# Supplementary material for: The Mobile Element Locator Tool (MELT): population-scale mobile element discovery and biology
Source: Genome Res. 2017 Nov;27(11):1916–29. doi: 10.1101/gr.218032.116 (PMC5668948; doi:10.1101/gr.218032.116)
Supplement: Supplemental Material [file supp_gr.218032.116_Supplemental_Table_S1.xlsx]

## Sheet: Sheet1
Supplemental Table S1. MEI features assessed by MELT.
During normal MELT analysis or with additional MELT tools, the MEI features described in this table are
ascertained whenever possible for applicable MEI types (see also Supplemental Fig. S2).
Feature	Description
Insertion site	Chromosomal position where MEI occurs (bp resolution where possible)
Insertion site assess score	Quality score based on the evidence used to call the insertion site (ranging from 0 to 5)
Insertion site features	Annotated genomic feature(s) at insertion site (e.g., coding exon of known gene)
Orientation	MEI is either in the forward or reverse direction on the chromosome
Target site duplication (TSD)	Duplicated target DNA sequence flanking new MEI insertion
MEI Length	Estimate of MEI length using MEI coordinates detected with DRP and SR
Adjacent deletion	Deletion of adjacent genomic sequences at MEI site
Interior mutations	Identified interior mutations in each MEI compared to consensus elements
Subfamily analysis	Uses interior mutations to assign subfamily status to each MEI
Offspring tracking with interior mutations	Uses interior mutations to track source/offspring relationships
3' transductions/offspring tracking	Identifies 3' transductions and uses them to track source/offspring relationships
5’ inversions	L1 MEI with 5' sequences inverted due to twin priming
Genotype analysis	Determine whether the site is hom REF, HET, or hom ALT in each sample
MELT-DEL (Reference MEIs)	Determines whether a reference MEI is present in a given genome
PacBio L1	PacBio-based L1 MEI detection with long reads—detection in complex regions
