# Supplementary material for: The Mobile Element Locator Tool (MELT): population-scale mobile element discovery and biology
Source: Genome Res. 2017 Nov;27(11):1916–29. doi: 10.1101/gr.218032.116 (PMC5668948; doi:10.1101/gr.218032.116)
Supplement: Supplemental Material [file supp_gr.218032.116_Supplemental_Table_S2.xlsx]

## Sheet: Sheet1
Supplemental Table S2. MELT tranches.
Description of the different breakpoint accuracy tranches reported in the MELT
VCF file and the numbers of human MEI sites in each tranche (sites reported in
the last column are from the updated 1000 Genomes data presented in
Supplemental Fig. S6).
Assess Score	Evidence	Total Sites Human Analysis
0	Imprecise TSD Estimate	1621
1	Precise TSD Estimate	580
2	DRP TSD Evidence Only	764
3	Left Side SR Evidence Only	4083
4	Right Side SR Evidence Only	4312
5	Both Side SR Evidence	11363
