# Supplementary material for: The Mobile Element Locator Tool (MELT): population-scale mobile element discovery and biology
Source: Genome Res. 2017 Nov;27(11):1916–29. doi: 10.1101/gr.218032.116 (PMC5668948; doi:10.1101/gr.218032.116)
Supplement: Supplemental Material [file supp_gr.218032.116_Supplemental_Table_S3.xlsx]

## Sheet: Sheet1
Supplemental Table S3. Differences between MELT ver. 1.0 and MELT ver. 2.0.
The table lists improvements and upgrades that were engineered into MELT ver. 2.0 compared to MELT
ver. 1.0 (top). New biological discoveries that were facilitated by MELT ver. 2.0 in this study also are listed
(bottom).
New features in MELT ver. 2.0 compared to MELT ver. 1.0:
Multiple new runtimes including MELT-Single, Split, and Cloud
Improved sensitivity of rare MEIs by altering the rules for using DRPs and SRs
Improved filtering rules to increase sensitivity for MEIs close to REF MEs
Assembly of MEIs and assignment to subfamilies with CAlu, LINEu, generic
3' transduction caller, 5’ inversion caller
MELT-DEL caller (to genotype REF MEIs in new genomes)
Extensive benchmarking for multiple variables using simulations and real data plus comparisons with other MEI discovery tools
Additional PCR validations
Over 200 downloads with user feedback at our download site/Google chat site
Thorough documentation provided as an online manual (melt.igs.umaryland.edu/manual.php)
Numerous bug fixes and improvements to code efficiency
New biological data in this paper:
Expanded 1KGP MEI call set including 36.6% more MEIs
Analysis of known and novel Alu subfamilies in 1KGP populations
Novel FL-L1 source element and offspring analysis using 3’ transductions in 1KGP populations
Comparisons of FL-L1 source element activities in the germline, somatic cancers, and cultured cells
5' inversion analysis across 1KGP and several additional studies
MEI discovery and analysis in chimpanzee and ancient hominid (Neanderthal and Denisovan) genomes
Discovery of MEI introgression from ancient hominids to modern humans
