# Supplementary material for: The Mobile Element Locator Tool (MELT): population-scale mobile element discovery and biology
Source: Genome Res. 2017 Nov;27(11):1916–29. doi: 10.1101/gr.218032.116 (PMC5668948; doi:10.1101/gr.218032.116)
Supplement: Supplemental Material [file supp_gr.218032.116_Supplemental_Table_S4.xlsx]

## Sheet: A
Supplemental Table S4. Datasets used in this study.
(A) Samples used for assessment of scalability of MEI discovery algorithms
Low Coverage
Genome	Order	Coverage
NA12878	1	6.02115
NA12004	2	11.753
NA11932	3	7.26543
NA12829	4	7.73855
NA12749	5	9.24766
NA12778	6	8.40862
NA12383	7	9.17738
NA12005	8	15.6668
NA12155	9	17.0002
NA07000	10	11.277
High Coverage
HG00419	N/A	60
HG01051	N/A	60
HG03642	N/A	60
NA12878	N/A	60
NA19240	N/A	60
Note: the same five high coverage genomes were used to measure the mutation rates in Alu copies (reported in Supplemental Table S8).

## Sheet: B
Supplemental Table S4. Datasets used in this study.
(B) Data repository locations of genomes utilized in this study, including URL and pubmed ID (PMID) of relevant publication
Genome	URL	PMID
Andromeda	http://sra-download.ncbi.nlm.nih.gov/srapub/SRR726275	23823723
Banyo	http://sra-download.ncbi.nlm.nih.gov/srapub/SRR748125	23823723
Basho	http://sra-download.ncbi.nlm.nih.gov/srapub/SRR748129	23823723
Bosco	http://sra-download.ncbi.nlm.nih.gov/srapub/SRR747951	23823723
Bwambale	http://sra-download.ncbi.nlm.nih.gov/srapub/SRR726352	23823723
Clara	http://sra-download.ncbi.nlm.nih.gov/srapub/SRR748071	23823723
Clint	http://sra-download.ncbi.nlm.nih.gov/srapub/SRR748179	23823723
Damian	http://sra-download.ncbi.nlm.nih.gov/srapub/SRR748133	23823723
Donald	http://sra-download.ncbi.nlm.nih.gov/srapub/SRR747947	23823723
Doris	http://sra-download.ncbi.nlm.nih.gov/srapub/SRR748061	23823723
Harriet	http://sra-download.ncbi.nlm.nih.gov/srapub/SRR747955	23823723
Jimmie	http://sra-download.ncbi.nlm.nih.gov/srapub/SRR748051	23823723
Julie_A959	http://sra-download.ncbi.nlm.nih.gov/srapub/SRR748066	23823723
Julie_LWC21	http://sra-download.ncbi.nlm.nih.gov/srapub/SRR748138	23823723
Kidongo	http://sra-download.ncbi.nlm.nih.gov/srapub/SRR726360	23823723
Koby	http://sra-download.ncbi.nlm.nih.gov/srapub/SRR748081	23823723
Kopongo	http://sra-download.ncbi.nlm.nih.gov/srapub/SRR748143	23823723
Koto	http://sra-download.ncbi.nlm.nih.gov/srapub/SRR748147	23823723
Nakuu	http://sra-download.ncbi.nlm.nih.gov/srapub/SRR726408	23823723
Paquita	http://sra-download.ncbi.nlm.nih.gov/srapub/SRR748152	23823723
Taweh	http://sra-download.ncbi.nlm.nih.gov/srapub/SRR748156	23823723
Tobi	http://sra-download.ncbi.nlm.nih.gov/srapub/SRR748161	23823723
Vaillant	http://sra-download.ncbi.nlm.nih.gov/srapub/SRR748056	23823723
Vincent	http://sra-download.ncbi.nlm.nih.gov/srapub/SRR726233	23823723
Neanderthal	http://cdna.eva.mpg.de/neandertal/altai/	24352235
Denisovan	http://cdna.eva.mpg.de/neandertal/altai/	22936568
1000 Genomes Human	ftp://ftp-trace.ncbi.nih.gov/1000genomes/ftp/phase3/data/	26432245

## Sheet: C
Supplemental Table S4. Datasets used in this study.
(C) Color key for populations in the main text figures.
Population Abbreviation	Population Description	Color	Hex Key
ACB	African Caribbean in Barbados		#FF9900
ASW	African Ancestry in Southwest US		#FF6600
BEB	Bengali in Bangladesh		#8B008B
CDX	Chinese Dai in Xishuangbanna, China		#339900
CEU	Utah residents with Northern and Western European ancestry		#0000FF
CHB	Han Chinese in Bejing, China		#ADCD00
CHS	Southern Han Chinese, China		#00FF00
CLM	Colombian in Medellin, Colombia		#CC3333
ESN	Esan in Nigeria		#FFCD00
FIN	Finnish in Finland		#00C5CD
GBR	British in England and Scotland		#00EBFF
GIH	Gujarati Indian in Houston,TX		#9400D3
GWD	Gambian in Western Division, The Gambia		#FFB900
IBS	Iberian populations in Spain		#6495ED
ITU	Indian Telugu in the UK		#B03060
JPT	Japanese in Tokyo, Japan		#008B00
KHV	Kinh in Ho Chi Minh City, Vietnam		#00CC33
LWK	Luhya in Webuye, Kenya		#CC9933
MSL	Mende in Sierra Leone		#E1B919
MXL	Mexican Ancestry in Los Angeles, California		#E10033
PEL	Peruvian in Lima, Peru		#FF0000
PJL	Punjabi in Lahore, Pakistan		#E11289
PUR	Puerto Rican in Puerto Rico		#CC3300
STU	Sri Lankan Tamil in the UK		#FF00FF
TSI	Toscani in Italy		#00008B
YRI	Yoruba in Ibadan, Nigeria		#FFB933
AFR	African super population		#FF99FF
AMR	American super population		#FF3D3D
EAS	East Asian super population		#FFB9ED
EUR	European super population		#FFCC33
SAS	South asian super population		#FFB9FF

## Sheet: D
Supplemental Table S4. Datasets used in this study.
(D) 1KGP and chimp samples filtered for this study (see Methods).
Human	Chimp
HG01182	Akawaya-Jean
HG01183
HG01187
HG01188
NA19474
NA19338
NA19055
NA18498
HG01522
NA19707
HG01495
HG01204
NA19058
NA18867
NA19116
NA18984
NA19000
HG00123
NA18982
HG01101
NA18537
NA18986
NA11994
HG00110
NA18504
NA19719
NA18624
NA18912
NA18632
HG01168
NA19063
NA19703
NA19789
NA18633
NA19909
NA18623
HG00864
NA12399
NA20800
NA12400
NA11832
NA19914
NA18636
NA19473
HG00236
HG00140
HG00238
NA19430
NA19247
NA19248
NA19901
NA18870
HG01366
HG01334
NA18853
HG02121
NA19064
HG01437
NA06985
HG03907
NA19819
HG03925
NA19075
NA19213
HG03595
HG03908
HG03805
NA19682
HG03594
HG03926
NA19189
HG02008
HG01176
NA19060
HG03304
HG01167
HG03378
NA19009
HG03354
NA19066
NA19921
NA19236

## Sheet: E
Supplemental Table S4. Datasets used in this study.
(E) Samples used for assessment of MELT sensitivity in cancer genomes analyzed by Tubio et al.
Genome	Tumor Type
G12520.TCGA-60-2711	Lung
G8893.TCGA-66-2766	Lung
TCGA-AA-3516	Colorectal
TCGA-D5-6540	Colorectal
