# Supplementary material for: The Mobile Element Locator Tool (MELT): population-scale mobile element discovery and biology
Source: Genome Res. 2017 Nov;27(11):1916–29. doi: 10.1101/gr.218032.116 (PMC5668948; doi:10.1101/gr.218032.116)
Supplement: Supplemental Material [file supp_gr.218032.116_Supplemental_Table_S5.xlsx]

## Sheet: A
Supplemental Table S5. MEI discovery algorithm comparisons.
(A) Individual trial runtimes for each MEI discovery algorithm using the NA12878 genome at 6X and 30X coverages.
6X Coverage
Algorithm	Trial 1 (s)	2	3	4	5	Average (s)	STDEV (s)	Average (m)	STDEV (m)
MELT	633	639	636	656	638	640.4	9.01665	10.6733	0.150278
TEMP	889	921	895	892	902	899.8	12.7945	14.9967	0.213242
RetroSeq	2515	2529	2497	2499	2526	2513.2	14.8391	41.8867	0.247319
Tangram	3813	3811	3817	3818	3812	3814.2	3.11448	63.57	0.051908
Mobster	1667	1670	1671	1679	1688	1675	8.51469	27.9167	0.141912
30X Coverage
Algorithm	Trial 1 (s)	2	3	4	5	Average (s)	STDEV (s)	Average (m)	STDEV (m)
MELT	5640	5617	5680	5528	5529	5598.8	68.0199	93.3133	1.13366
TEMP	8988	8986	10129	8463	8122	8937.6	760.718	148.96	12.6786
RetroSeq	26727	26636	26626	26741	26788	26703.6	70.1092	445.06	1.16849
Tangram	189886	189918	189825	189775	189876	189856	56.2717	3164.27	0.937861
Mobster	DNF	DNF	DNF	DNF	DNF	#N/A	#N/A	#N/A	#N/A

## Sheet: B
Supplemental Table S5. MEI discovery algorithm comparisons.
(B) Scalability tests using between one and 10 CEU WGS samples (indicated in seconds).
Mobster
	1 (s)	2	3	4	5
1	2205	2370	2190	2205	2280
2	8075	8175	8496	8174	7605
3	11279	11251	10980	10860	10680
4	24113	24228	23971	22400	20655
5	20731	18165	17535	17460	16965
6	21321	21779	26985	21735	21384
7	31457	29475	28635	24105	30630
8	39245	39105	36800	32820	36660
9	62985	63423	57052	40650	71887
10	56886	52429	54142	46141	130959
2500	13375809	154.8 days	Y = 5352*X - 4191
TEMP
	1 (s)	2	3	4	5
1	10366	6277	8858	6816	5159	Red text is not plotted in Figure 1B
2	24978	99825	25100	27724	33035
3	26469	34510	25292	34332	33009
4	30228	42662	28375	36680	39118
5	34496	307335	171594	40381	42347
6	67577	330375	44959	52809	105963
7	73346	63510	53957	58370	99704
8	109074	43569	86488	84547	126984
9	128645	39238	109692	106471	146926
10	149264	111105	123444	111064	155861
2500	25894689	299.7 days	Y = 10360*X - 5311
MELT
	1	2	3	4	5
1	825	840	870	870	885
2	5970	6210	6413	6870	6645
3	5850	5970	6060	6135	6450
4	5910	5925	5985	7627	6735
5	6135	6159	6450	6360	7530
6	6255	6390	7110	6690	6837
7	6690	6660	7335	7050	7150
8	8145	8311	8985	8280	8652
9	9255	9690	9585	9180	9662
10	10020	10380	11430	11493	10710
2500	1889970	21.9 days	Y = 754.9*X + 2720
Tangram
Tangram-23							Tangram-46							Tangram-92
	1 (s)	2	3	4	5			1 (s)	2	3	4	5			1 (s)	2	3	4	5
1	900	885	810	855	885		1	570	570	600	584	557		1	510	510	495	480	480
2	3465	3450	2670	3135	3450		2	2145	2055	2100	2115	2249		2	1785	1770	1770	1620	1589
3	6127	6015	6450	6000	6075		3	5266	5625	4456	5685	5940		3	5370	2505	2415	4575	4470
4	5415	5175	7515	5370	5295		4	6479	5445	5910	4170	4080		4	5670	3105	3000	2670	5010
5	6960	6630	8191	6780	6720		5	5870	7050	6285	6030	5220		5	6660	3990	3900	5070	3405
6	8025	8070	9990	8190	8220		6	7379	8730	7965	7950	9000		6	7785	4755	4725	5985	5910
7	10410	9780	10620	9705	9795		7	11551	8280	11189	8595	8085		7	8145	6150	5565	8115	8280
8	20535	19965	19005	18796	19869		8	18780	17835	16450	15375	16140		8	7965	7965	12360	13456	13220
9	25725	26565	23445	26775	27169		9	22530	21230	17715	19260	20745		9	10095	9735	17145	13965	15885
10	29393	28633	25179	26343	27270		10	20978	23955	19227	20025	22907		10	10890	10725	18397	16404	16806
2500	7257979	84.0 days	Y = 2905*X - 4521

## Sheet: C
Supplemental Table S5. MEI discovery algorithm comparisons.
(C) Sensitivity of MELT with 50 simulated human genomes
Run ID	% MEIs Properly Ascertained												% Aggregate Ascertained					Aggregate Formula
	60X Alu	30X Alu	15X Alu	7.5X Alu	60X L1	30X L1	15X L1	7.5X L1	60X SVA	30X SVA	15X SVA	7.5X SVA	60X	30X	15X	7.5X		=((((ALU/100)*922)+((LINE1/100)*124)+((SVA/100)*46))/1092) *100
1	96.85	95.44	92.19	84.92	99.19	99.19	99.19	91.94	97.83	97.83	91.3	84.78	97.157	95.9665	92.9474	85.7112
2	96.42	95.34	93.06	86.77	97.58	96.77	95.16	86.29	100	100	97.83	89.13	96.7025	95.6987	93.4994	86.8149
3	96.2	95.23	92.52	87.42	99.19	98.39	97.58	90.32	100	100	95.65	89.13	96.6996	95.7898	93.2264	87.8213
4	95.23	94.69	91.87	86.23	98.39	98.39	95.16	91.13	95.65	93.48	93.48	80.43	95.6065	95.0592	92.3114	86.5421
5	95.88	94.79	92.3	85.79	98.39	97.58	95.97	91.13	97.83	97.83	95.65	78.26	96.2472	95.2349	92.8579	86.0792
6	96.64	95.77	93.17	85.9	98.39	98.39	96.77	93.55	91.3	93.48	91.3	82.61	96.6138	95.971	93.5	86.6301
7	94.9	94.25	90.89	83.08	98.39	98.39	95.16	90.32	95.65	93.48	93.48	78.26	95.3279	94.6877	91.484	83.6991
8	95.99	95.12	93.49	86.98	99.19	99.19	98.39	94.35	95.65	93.48	93.48	82.61	96.339	95.5131	94.046	87.6328
9	96.64	95.99	94.25	87.53	96.77	95.16	91.94	88.71	100	100	97.83	91.3	96.7963	96.0647	94.1385	87.8228
10	95.01	94.79	91.76	85.68	96.77	95.16	95.97	87.9	95.65	97.83	95.65	84.78	95.2368	94.9601	92.4019	85.8942
11	96.64	95.66	92.95	87.85	97.58	97.58	95.16	92.74	97.83	95.65	95.65	82.61	96.7969	95.8776	93.3147	88.1845
12	95.88	94.9	92.52	86.88	98.39	96.77	93.55	91.13	97.83	97.83	95.65	89.13	96.2472	95.2358	92.7688	87.4574
13	97.07	96.2	94.25	87.2	99.19	98.39	97.58	94.35	95.65	95.65	93.48	86.96	97.2509	96.4255	94.5957	88.0018
14	96.31	95.01	92.73	84.06	96.77	95.16	91.94	87.9	97.83	93.48	91.3	78.26	96.4263	94.9626	92.5801	84.2517
15	96.75	96.31	93.6	86.23	98.39	98.39	95.97	89.52	97.83	95.65	95.65	86.96	96.9817	96.5184	93.9555	86.6343
16	95.55	94.9	92.84	86.77	97.58	96.77	96.77	88.71	91.3	89.13	91.3	71.74	95.6015	94.8693	93.2214	86.3572
17	96.2	95.01	92.19	84.82	95.97	95.97	95.97	87.9	95.65	89.13	84.78	78.26	96.1507	94.8713	92.3071	84.8934
18	95.12	94.14	92.08	86.44	100	100	97.58	94.35	97.83	97.83	93.48	80.43	95.7883	94.9609	92.7635	87.085
19	97.07	96.1	91.97	82.65	96.77	95.97	93.55	88.71	97.83	95.65	89.13	71.74	97.0679	96.0663	92.0298	82.8786
20	97.4	96.31	94.9	87.74	99.19	99.19	98.39	94.35	95.65	97.83	95.65	84.78	97.5295	96.7011	95.3279	88.3659
21	95.88	95.23	91.65	86.66	96.77	95.16	93.55	88.71	100	97.83	95.65	97.83	96.1546	95.3316	92.0342	87.3633
22	96.1	95.23	91.54	85.25	95.97	95.16	94.35	87.9	97.83	97.83	95.65	86.96	96.1581	95.3316	92.0322	85.6229
23	95.66	94.58	92.41	84.6	97.58	96.77	95.16	87.1	100	97.83	93.48	80.43	96.0608	94.9656	92.7673	84.7082
24	96.75	95.01	93.17	83.84	95.16	95.16	91.94	87.9	100	97.83	89.13	84.78	96.7064	95.1458	92.8601	84.3406
25	95.77	95.55	92.73	86.01	97.58	97.58	95.16	91.13	100	97.83	84.78	78.26	96.1537	95.8766	92.671	86.2649
26	95.23	94.9	92.3	86.23	95.97	95.97	95.97	89.52	95.65	95.65	100	86.96	95.3317	95.0531	93.0411	86.6343
27	95.99	95.66	93.38	87.2	98.39	97.58	95.16	86.29	97.83	95.65	93.48	86.96	96.34	95.8776	93.5863	87.0866
28	96.31	95.12	93.28	87.42	95.97	96.77	94.35	91.13	100	97.83	91.3	84.78	96.4268	95.4215	93.3181	87.7301
29	96.53	95.77	93.06	86.44	92.74	93.55	92.74	88.71	97.83	97.83	93.48	89.13	96.1544	95.6047	93.0414	86.8111
30	95.12	93.93	91.43	85.36	100	99.19	97.58	89.52	93.48	91.3	89.13	71.74	95.6051	94.4165	92.0315	85.2586
31	95.55	94.79	93.17	85.9	96.77	96.77	95.97	91.94	97.83	95.65	93.48	84.78	95.7846	95.0511	93.501	86.5387
32	95.99	95.23	93.6	85.25	98.39	98.39	96.77	90.32	95.65	95.65	93.48	80.43	96.2482	95.6065	93.9549	85.6227
33	96.53	96.2	93.93	87.2	100	98.39	98.39	89.52	100	100	95.65	80.43	97.0702	96.6088	94.5089	87.1783
34	96.96	96.2	93.6	86.01	95.97	95.16	93.55	86.29	95.65	97.83	95.65	89.13	96.7924	96.1506	93.6807	86.1732
35	96.53	95.77	93.38	86.23	99.19	97.58	97.58	90.32	100	97.83	95.65	82.61	96.9782	96.0623	93.9525	86.5419
36	95.34	94.47	92.41	83.3	95.97	94.35	91.94	85.48	93.48	93.48	91.3	84.78	95.3332	94.4147	92.3099	83.6099
37	95.77	94.25	91.54	85.03	98.39	97.58	96.77	92.74	95.65	93.48	91.3	78.26	96.0625	94.5957	92.1238	85.6203
38	96.53	95.77	92.95	86.33	98.39	97.58	95.97	91.13	93.48	93.48	91.3	80.43	96.6127	95.8791	93.2234	86.6265
39	96.42	96.2	93.06	87.31	96.77	95.16	94.35	88.71	97.83	95.65	95.65	84.78	96.5191	96.0587	93.3156	87.3624
40	96.2	95.77	93.06	86.33	95.16	95.16	92.74	90.32	97.83	97.83	95.65	86.96	96.1506	95.7875	93.1328	86.8096
41	96.1	94.69	92.3	84.16	95.97	95.16	93.55	90.32	97.83	97.83	95.65	86.96	96.1581	94.8756	92.5831	84.9774
42	96.42	95.01	93.38	84.71	94.35	92.74	91.13	86.29	95.65	97.83	91.3	82.61	96.1525	94.871	93.0369	84.801
43	96.53	95.12	93.49	85.25	92.74	91.94	91.94	89.52	95.65	93.48	89.13	82.61	96.0626	94.6898	93.1303	85.6237
44	96.42	95.77	93.28	85.79	94.35	94.35	93.55	89.52	93.48	91.3	84.78	76.09	96.0611	95.4205	92.9526	85.8049
45	96.42	95.44	92.73	85.36	96.77	96.77	95.16	85.48	93.48	91.3	89.13	82.61	96.3359	95.4166	92.8543	85.2578
46	95.66	93.82	92.19	86.33	95.97	95.16	91.94	87.1	95.65	95.65	95.65	80.43	95.6948	94.0492	92.3074	86.1689
47	96.31	95.44	92.84	85.79	97.58	96.77	95.16	91.13	100	97.83	95.65	86.96	96.6097	95.6917	93.2218	86.4457
48	96.53	96.75	93.06	86.33	97.58	97.58	94.35	86.29	97.83	100	93.48	82.61	96.704	96.9812	93.2242	86.1688
49	95.77	95.55	92.84	85.57	99.19	98.39	95.97	89.52	97.83	97.83	93.48	82.61	96.2451	95.9685	93.2224	85.8938
50	97.4	96.31	94.03	86.12	97.58	97.58	94.35	91.13	97.83	95.65	95.65	80.43	97.4386	96.4264	94.1346	86.4492
Average	96.1694	95.3096	92.8264	85.885	97.3058	96.725	95.0968	89.7256	97.0008	96.0446	93.2162	83.13	96.3335	95.5013	93.1006	86.2051
STDEV	0.60554	0.678642	0.80849	1.2082	1.71388	1.78065	2.02654	2.38211	2.32048	2.73318	3.27667	5.03819	0.552595	0.655693	0.757439	1.221
N	50	50	50	50	50	50	50	50	50	50	50	50	50	50	50	50

## Sheet: D
Supplemental Table S5. MEI discovery algorithm comparisons.
(D) Sensitivity of TEMP with 50 simulated human genomes
Run ID	% MEIs Properly Ascertained												% Aggregate Ascertained
	60X Alu	30X Alu	15X Alu	7.5X Alu	60X L1	30X L1	15X L1	7.5X L1	60X SVA	30X SVA	15X SVA	7.5X SVA	60X	30X	15X	7.5X
1	76.2473	79.6095	77.5488	73.9696	86.2903	83.0645	75	70.1613	67.3913	73.913	69.5652	63.0435	77.0147	79.7619	76.9231	73.0769
2	76.898	80.2603	76.7896	73.6443	83.0645	75.8065	71.7742	68.5484	65.2174	69.5652	67.3913	65.2174	77.1062	79.304	75.8242	72.7106
3	77.0065	81.8872	78.0911	74.4035	87.9032	82.2581	77.4194	70.9677	69.5652	73.913	71.7391	69.5652	77.9304	81.5934	77.7473	73.8095
4	78.0911	83.0803	79.2842	74.4035	83.871	78.2258	72.5806	64.5161	58.6957	56.5217	56.5217	54.3478	77.9304	81.4103	77.5641	72.4359
5	77.5488	81.7787	78.7419	75.0542	79.8387	74.1935	71.7742	66.129	60.8696	63.0435	58.6957	56.5217	77.1062	80.1282	77.1062	73.2601
6	76.1388	80.4772	77.5488	73.5358	80.6452	75	69.3548	66.9355	65.2174	71.7391	71.7391	60.8696	76.1905	79.4872	76.3736	72.2527
7	75.5965	77.5488	74.7289	71.1497	76.6129	74.1935	70.1613	66.129	65.2174	67.3913	63.0435	60.8696	75.2747	76.7399	73.7179	70.1465
8	78.5249	81.5618	79.0672	76.1388	88.7097	82.2581	79.8387	75	67.3913	67.3913	65.2174	63.0435	79.2125	81.044	78.5714	75.4579
9	76.0304	82.2126	77.3319	73.5358	86.2903	76.6129	74.1935	70.1613	84.7826	80.4348	80.4348	78.2609	77.5641	81.5018	77.1062	73.3516
10	77.6573	80.8026	77.5488	74.6204	81.4516	78.2258	73.3871	69.3548	67.3913	78.2609	76.087	67.3913	77.6557	80.4029	77.0147	73.7179
11	79.718	83.2972	80.3688	78.1996	81.4516	75.8065	72.5806	66.9355	71.7391	76.087	73.913	73.913	79.5788	82.1429	79.2125	76.7399
12	78.5249	82.4295	78.5249	75.1627	84.6774	83.871	77.4194	74.1935	67.3913	73.913	69.5652	69.5652	78.7546	82.2344	78.022	74.8168
13	81.128	83.731	80.3688	77.115	85.4839	79.0323	75	67.7419	73.913	78.2609	69.5652	69.5652	81.3187	82.967	79.304	75.7326
14	75.4881	79.3926	75.4881	72.3427	76.6129	70.9677	66.129	62.9032	73.913	76.087	73.913	71.7391	75.5495	78.2967	74.359	71.2454
15	77.6573	82.321	79.2842	74.9458	82.2581	78.2258	75.8065	73.3871	67.3913	76.087	71.7391	65.2174	77.7473	81.5934	78.5714	74.359
16	78.7419	82.7549	79.1757	75.1627	79.0323	74.1935	69.3548	65.3226	58.6957	60.8696	54.3478	52.1739	77.9304	80.8608	77.0147	73.0769
17	77.6573	81.4534	77.5488	73.6443	80.6452	73.3871	70.9677	65.3226	67.3913	71.7391	69.5652	67.3913	77.5641	80.1282	76.4652	72.4359
18	79.2842	83.8395	79.6095	75.3796	83.0645	78.2258	74.1935	70.1613	67.3913	73.913	73.913	69.5652	79.2125	82.7839	78.7546	74.5421
19	78.308	81.4534	77.6573	74.1866	78.2258	75	69.3548	62.0968	56.5217	63.0435	54.3478	50	77.381	79.9451	75.7326	71.7949
20	79.2842	82.321	78.7419	75.8134	85.4839	80.6452	76.6129	71.7742	73.913	76.087	73.913	73.913	79.7619	81.8681	78.2967	75.2747
21	76.5727	80.8026	77.6573	73.2104	83.871	77.4194	76.6129	74.1935	84.7826	84.7826	82.6087	82.6087	77.7473	80.5861	77.7473	73.7179
22	76.3557	79.0672	76.2473	73.3189	79.0323	74.1935	70.1613	66.129	76.087	76.087	71.7391	71.7391	76.6484	78.3883	75.3663	72.4359
23	78.5249	80.6941	78.4165	75.705	77.4194	71.7742	70.1613	66.129	69.5652	73.913	69.5652	65.2174	78.022	79.3956	77.1062	74.1758
24	76.3557	81.0195	77.8742	74.1866	80.6452	75.8065	70.1613	69.3548	67.3913	69.5652	65.2174	65.2174	76.4652	79.9451	76.4652	73.2601
25	77.8742	81.7787	78.1996	74.0781	89.5161	81.4516	79.8387	75.8065	67.3913	69.5652	67.3913	63.0435	78.7546	81.2271	77.9304	73.8095
26	79.1757	83.5141	79.8265	76.0304	79.8387	75	70.1613	65.3226	78.2609	80.4348	80.4348	76.087	79.2125	82.4176	78.7546	74.8168
27	78.7419	82.6464	79.3926	75.3796	72.5806	69.3548	66.9355	63.7097	71.7391	76.087	69.5652	69.5652	77.7473	80.8608	77.5641	73.8095
28	79.6095	82.6464	80.1518	76.5727	86.2903	83.0645	79.8387	75.8065	71.7391	71.7391	71.7391	65.2174	80.0366	82.2344	79.7619	76.0073
29	78.1996	81.8872	78.8503	75.3796	79.0323	75.8065	67.7419	63.7097	78.2609	76.087	73.913	73.913	78.2967	80.9524	77.381	73.9927
30	76.4642	80.2603	78.0911	74.0781	80.6452	75.8065	72.5806	68.5484	65.2174	65.2174	65.2174	60.8696	76.4652	79.1209	76.9231	72.8938
31	76.898	80.4772	77.2234	73.2104	82.2581	79.8387	74.1935	67.7419	71.7391	73.913	71.7391	67.3913	77.2894	80.1282	76.6484	72.3443
32	78.8503	82.4295	78.0911	74.1866	83.871	79.8387	75.8065	64.5161	60.8696	67.3913	60.8696	54.3478	78.663	81.5018	77.1062	72.2527
33	78.1996	83.4056	79.3926	76.3557	79.0323	77.4194	74.1935	68.5484	63.0435	65.2174	63.0435	60.8696	77.6557	81.9597	78.1136	74.8168
34	77.6573	82.7549	79.3926	75.705	79.8387	75.8065	72.5806	66.9355	76.087	73.913	71.7391	69.5652	77.8388	81.5934	78.2967	74.4505
35	80.2603	83.731	78.8503	75.5965	81.4516	78.2258	70.9677	66.9355	60.8696	67.3913	60.8696	54.3478	79.5788	82.4176	77.1978	73.7179
36	76.898	80.8026	77.3319	73.7527	79.8387	75.8065	70.9677	68.5484	63.0435	65.2174	58.6957	58.6957	76.6484	79.5788	75.8242	72.5275
37	76.4642	79.3926	76.1388	73.2104	87.0968	84.6774	77.4194	72.5806	69.5652	76.087	71.7391	69.5652	77.381	79.8535	76.0989	72.9853
38	78.8503	82.321	78.5249	75.0542	79.0323	75	73.3871	71.7742	73.913	78.2609	78.2609	71.7391	78.663	81.3187	77.9304	74.5421
39	77.7657	82.4295	78.8503	74.1866	81.4516	79.0323	74.1935	69.3548	78.2609	78.2609	73.913	71.7391	78.2051	81.8681	78.1136	73.5348
40	77.8742	81.5618	78.6334	76.1388	85.4839	82.2581	79.8387	73.3871	67.3913	71.7391	65.2174	65.2174	78.2967	81.2271	78.2051	75.3663
41	77.0065	80.6941	77.0065	74.1866	82.2581	78.2258	75	70.9677	71.7391	73.913	71.7391	67.3913	77.381	80.1282	76.5568	73.5348
42	76.5727	80.0434	77.3319	73.3189	82.2581	79.0323	74.1935	72.5806	65.2174	69.5652	67.3913	65.2174	76.7399	79.4872	76.5568	72.8938
43	77.0065	79.9349	77.5488	72.6681	78.2258	74.1935	69.3548	62.9032	67.3913	71.7391	67.3913	65.2174	76.7399	78.9377	76.1905	71.2454
44	76.7896	82.538	77.8742	74.4035	83.0645	76.6129	73.3871	71.7742	69.5652	67.3913	65.2174	65.2174	77.1978	81.2271	76.8315	73.7179
45	77.2234	83.0803	79.5011	76.1388	81.4516	78.2258	75	70.9677	65.2174	69.5652	65.2174	63.0435	77.1978	81.9597	78.3883	75
46	77.115	81.3449	78.1996	75.3796	84.6774	81.4516	76.6129	71.7742	73.913	78.2609	76.087	69.5652	77.8388	81.2271	77.9304	74.7253
47	77.2234	81.4534	77.4403	74.7289	83.0645	80.6452	76.6129	71.7742	78.2609	84.7826	78.2609	73.913	77.9304	81.5018	77.381	74.359
48	79.8265	81.6703	79.3926	75.1627	77.4194	75	70.9677	66.9355	69.5652	76.087	65.2174	65.2174	79.1209	80.6777	77.8388	73.8095
49	79.718	83.8395	80.3688	77.7657	86.2903	80.6452	77.4194	70.9677	69.5652	73.913	71.7391	63.0435	80.0366	83.0586	79.6703	76.3736
50	79.0672	82.8633	79.3926	75.5965	84.6774	83.0645	75.8065	66.9355	76.087	73.913	71.7391	71.7391	79.5788	82.5092	78.663	74.4505
Average	77.8134	81.6659	78.2928	74.7419	82.0645	77.6774	73.5	68.8871	69.4348	72.5652	69.1739	66.1739	77.9432	80.8297	77.3645	73.7161
STDEV	1.29266	1.4034	1.23644	1.36114	3.49274	3.49988	3.437	3.57362	6.21754	5.77489	6.48005	6.70635	1.21446	1.33266	1.24256	1.34822
N	50	50	50	50	50	50	50	50	50	50	50	50	50	50	50	50

## Sheet: E
Supplemental Table S5. MEI discovery algorithm comparisons.
(E) Sensitivity of RetroSeq with 50 simulated human genomes
Run ID	% MEIs Properly Ascertained												% Aggregate Ascertained
	60X Alu	30X Alu	15X Alu	7.5X Alu	60X L1	30X L1	15X L1	7.5X L1	60X SVA	30X SVA	15X SVA	7.5X SVA	60X	30X	15X	7.5X
1	84.0564	81.3449	75.5965	62.4729	89.5161	87.0968	79.0323	72.5806	93.4783	91.3043	82.6087	67.3913	85.0733	82.4176	76.2821	63.8278
2	85.141	82.7549	75.9219	61.0629	84.6774	83.0645	75.8065	65.3226	89.1304	84.7826	76.087	67.3913	85.2564	82.8755	75.9158	61.8132
3	84.5987	82.4295	76.6811	61.2798	87.9032	85.4839	81.4516	71.7742	89.1304	86.9565	84.7826	73.913	85.1648	82.967	77.5641	63.0037
4	85.6833	82.7549	77.115	60.1952	85.4839	83.0645	79.0323	67.7419	84.7826	78.2609	69.5652	63.0435	85.6227	82.6007	77.0147	61.1722
5	84.0564	81.9957	77.3319	61.6052	84.6774	83.871	78.2258	64.5161	82.6087	78.2609	69.5652	56.5217	84.0659	82.0513	77.1062	61.7216
6	83.6226	81.4534	76.2473	58.5683	81.4516	81.4516	74.1935	67.7419	86.9565	84.7826	76.087	65.2174	83.5165	81.5934	76.0073	59.8901
7	82.4295	79.6095	73.4273	58.1345	81.4516	79.8387	76.6129	67.7419	78.2609	78.2609	71.7391	67.3913	82.1429	79.5788	73.7179	59.6154
8	86.1171	84.3818	78.1996	62.1475	88.7097	87.9032	82.2581	75	84.7826	82.6087	78.2609	78.2609	86.3553	84.707	78.663	64.2857
9	86.3341	84.0564	77.2234	59.0022	88.7097	87.0968	81.4516	65.3226	97.8261	97.8261	95.6522	89.1304	87.0879	84.9817	78.4799	60.989
10	83.5141	80.6941	77.4403	60.0868	85.4839	83.871	78.2258	65.3226	91.3043	91.3043	84.7826	60.8696	84.0659	81.5018	77.8388	60.7143
11	86.2256	83.731	78.7419	64.9675	83.0645	79.8387	75.8065	63.7097	84.7826	84.7826	80.4348	67.3913	85.8059	83.3333	78.4799	64.9267
12	86.9848	85.0325	78.4165	61.8221	86.2903	84.6774	82.2581	72.5806	95.6522	89.1304	80.4348	67.3913	87.2711	85.1648	78.9377	63.2784
13	87.4187	86.1171	80.6941	64.7505	83.871	83.0645	79.8387	66.129	84.7826	82.6087	80.4348	71.7391	86.9048	85.6227	80.5861	65.2015
14	84.7072	81.5618	76.0304	59.1106	79.0323	78.2258	72.5806	63.7097	82.6087	80.4348	78.2609	80.4348	83.9744	81.1355	75.7326	60.5311
15	85.9002	82.321	77.3319	60.5206	89.5161	87.9032	79.8387	69.3548	86.9565	82.6087	73.913	67.3913	86.3553	82.967	77.4725	61.8132
16	86.3341	82.4295	77.2234	62.9067	82.2581	80.6452	77.4194	65.3226	89.1304	80.4348	73.913	60.8696	85.989	82.1429	77.1062	63.0952
17	84.0564	82.6464	77.7657	60.7375	86.2903	85.4839	82.2581	62.0968	78.2609	76.087	73.913	71.7391	84.0659	82.6923	78.1136	61.3553
18	86.7679	85.2495	78.8503	62.039	83.871	83.871	77.4194	69.3548	84.7826	84.7826	78.2609	73.913	86.3553	85.0733	78.663	63.37
19	83.731	81.0195	76.7896	60.846	83.0645	79.0323	73.3871	65.3226	78.2609	78.2609	69.5652	63.0435	83.4249	80.6777	76.0989	61.4469
20	84.9241	81.7787	77.3319	61.9306	87.0968	85.4839	79.8387	68.5484	84.7826	82.6087	82.6087	76.087	85.1648	82.2344	77.8388	63.2784
21	87.2017	84.0564	77.8742	59.8698	85.4839	81.4516	76.6129	70.1613	93.4783	93.4783	91.3043	86.9565	87.2711	84.1575	78.2967	62.1795
22	84.9241	82.8633	77.4403	60.4121	85.4839	81.4516	74.1935	59.6774	91.3043	86.9565	84.7826	78.2609	85.2564	82.8755	77.381	61.0806
23	85.5748	82.4295	77.2234	62.9067	79.8387	79.0323	75	64.5161	84.7826	80.4348	73.913	63.0435	84.8901	81.9597	76.8315	63.0952
24	83.731	81.128	76.3557	58.1345	86.2903	82.2581	75	62.0968	86.9565	84.7826	84.7826	67.3913	84.1575	81.4103	76.5568	58.9744
25	84.4902	82.1041	78.4165	61.1714	91.129	90.3226	84.6774	67.7419	82.6087	82.6087	78.2609	69.5652	85.1648	83.0586	79.1209	62.2711
26	84.9241	83.5141	78.1996	62.5813	82.2581	78.2258	73.3871	62.9032	91.3043	91.3043	91.3043	84.7826	84.8901	83.2418	78.2051	63.5531
27	84.9241	82.538	78.4165	62.039	82.2581	79.8387	70.1613	59.6774	84.7826	82.6087	80.4348	73.913	84.6154	82.2344	77.5641	62.2711
28	86.551	84.2733	80.3688	61.4967	87.0968	86.2903	80.6452	69.3548	91.3043	86.9565	82.6087	69.5652	86.8132	84.6154	80.4945	62.7289
29	85.7918	82.7549	77.0065	62.6898	87.0968	81.4516	73.3871	62.9032	91.3043	84.7826	84.7826	80.4348	86.1722	82.6923	76.9231	63.4615
30	83.8395	81.2364	75.705	59.9783	83.0645	79.0323	75	66.129	82.6087	78.2609	73.913	65.2174	83.6996	80.8608	75.5495	60.8974
31	84.5987	82.6464	76.6811	58.1345	86.2903	84.6774	75	61.2903	89.1304	91.3043	86.9565	76.087	84.9817	83.2418	76.9231	59.2491
32	86.551	84.5987	78.1996	60.5206	87.9032	86.2903	83.871	66.129	78.2609	76.087	69.5652	60.8696	86.3553	84.4322	78.4799	61.1722
33	86.6594	84.3818	78.4165	62.256	81.4516	81.4516	76.6129	61.2903	89.1304	86.9565	80.4348	67.3913	86.1722	84.1575	78.2967	62.3626
34	85.141	82.538	77.8742	60.846	81.4516	79.0323	71.7742	62.0968	91.3043	84.7826	82.6087	71.7391	84.9817	82.2344	77.381	61.4469
35	85.6833	83.5141	78.0911	63.5575	90.3226	84.6774	75.8065	60.4839	82.6087	78.2609	73.913	67.3913	86.0806	83.4249	77.6557	63.37
36	82.538	79.8265	73.6443	58.8937	83.871	83.0645	76.6129	65.3226	82.6087	78.2609	73.913	60.8696	82.6923	80.1282	73.9927	59.707
37	84.3818	81.5618	76.3557	62.1475	91.129	91.9355	84.6774	69.3548	76.087	76.087	73.913	65.2174	84.7985	82.5092	77.1978	63.0952
38	84.9241	81.8872	77.3319	61.6052	87.9032	86.2903	80.6452	68.5484	84.7826	84.7826	84.7826	71.7391	85.2564	82.5092	78.022	62.8205
39	87.0933	83.4056	78.0911	60.5206	83.0645	81.4516	74.1935	68.5484	89.1304	82.6087	82.6087	69.5652	86.7216	83.1502	77.8388	61.8132
40	85.3579	83.8395	78.1996	61.1714	90.3226	87.9032	82.2581	68.5484	93.4783	82.6087	82.6087	65.2174	86.2637	84.2491	78.8462	62.1795
41	83.731	81.3449	77.0065	61.1714	84.6774	83.871	79.8387	69.3548	89.1304	89.1304	84.7826	78.2609	84.0659	81.9597	77.6557	62.8205
42	84.3818	82.8633	76.898	61.0629	83.871	81.4516	79.0323	70.1613	82.6087	80.4348	80.4348	69.5652	84.2491	82.6007	77.2894	62.4542
43	84.2733	81.5618	75.705	58.5683	83.0645	83.0645	71.7742	62.9032	82.6087	78.2609	82.6087	69.5652	84.0659	81.5934	75.5495	59.5238
44	83.8395	81.5618	76.6811	61.0629	82.2581	79.8387	75.8065	63.7097	78.2609	78.2609	73.913	65.2174	83.4249	81.2271	76.4652	61.5385
45	84.5987	81.9957	77.3319	61.9306	84.6774	79.0323	77.4194	67.7419	86.9565	84.7826	73.913	73.913	84.707	81.7766	77.1978	63.0952
46	83.0803	80.6941	76.7896	59.8698	88.7097	87.0968	83.0645	66.129	93.4783	91.3043	86.9565	80.4348	84.1575	81.8681	77.9304	61.4469
47	84.4902	82.6464	77.5488	63.449	88.7097	87.0968	82.2581	69.3548	89.1304	82.6087	80.4348	73.913	85.1648	83.1502	78.2051	64.5604
48	84.2733	81.7787	76.4642	62.6898	79.8387	76.6129	73.3871	61.2903	82.6087	82.6087	80.4348	67.3913	83.6996	81.2271	76.2821	62.7289
49	85.6833	82.8633	78.7419	60.9544	85.4839	84.6774	79.8387	67.7419	89.1304	80.4348	76.087	71.7391	85.8059	82.967	78.7546	62.1795
50	85.141	83.4056	77.115	61.2798	87.9032	82.2581	76.6129	67.7419	89.1304	86.9565	84.7826	76.087	85.6227	83.4249	77.381	62.6374
Average	85.0195	82.5835	77.2907	61.1432	85.3065	83.2419	77.7097	66.2419	86.5652	83.6957	79.6522	70.6087	85.1172	82.7051	77.4377	62.1209
STDEV	1.22015	1.36245	1.30537	1.58872	3.10115	3.39144	3.66048	3.56216	5.00164	4.97379	5.98598	7.04415	1.21068	1.32486	1.32755	1.44435
N	50	50	50	50	50	50	50	50	50	50	50	50	50	50	50	50

## Sheet: F
Supplemental Table S5. MEI discovery algorithm comparisons.
(F) Sensitivity of Tangram with 50 simulated human genomes
Run ID	% MEIs Properly Ascertained												% Aggregate Ascertained
	60X Alu	30X Alu	15X Alu	7.5X Alu	60X L1	30X L1	15X L1	7.5X L1	60X SVA	30X SVA	15X SVA	7.5X SVA	60X	30X	15X	7.5X
1	95.4447	97.0716	90.6725	70.8243	90.3226	92.7419	73.3871	45.9677	76.087	93.4783	69.5652	39.1304	94.0476	96.4286	87.8205	66.6667
2	95.0108	96.9631	91.8655	72.7766	83.0645	87.0968	74.1935	42.7419	89.1304	91.3043	65.2174	43.4783	93.4066	95.6044	88.7363	68.1319
3	94.0347	96.0954	90.564	73.4273	83.871	87.0968	72.5806	47.5806	89.1304	93.4783	76.087	41.3043	92.674	94.9634	87.9121	69.1392
4	94.9024	96.0954	91.4317	71.8004	87.0968	90.3226	70.9677	40.3226	80.4348	89.1304	69.5652	45.6522	93.4066	95.1465	88.1868	67.1245
5	94.4685	97.18	89.5879	69.4143	85.4839	89.5161	69.3548	41.9355	73.913	84.7826	71.7391	45.6522	92.5824	95.7875	86.5385	65.293
6	94.577	96.2039	90.4555	71.2581	85.4839	88.7097	77.4194	51.6129	76.087	89.1304	76.087	32.6087	92.7656	95.0549	88.37	67.3993
7	95.4447	96.9631	92.2993	70.6074	82.2581	87.0968	73.3871	37.0968	78.2609	80.4348	69.5652	41.3043	93.2234	95.1465	89.1941	65.5678
8	94.2516	96.5293	90.3471	71.4751	81.4516	87.0968	73.3871	50	71.7391	84.7826	50	26.087	91.8498	94.9634	86.7216	67.1245
9	95.3362	97.8308	92.4078	74.6204	84.6774	86.2903	72.5806	45.1613	82.6087	86.9565	73.913	45.6522	93.5897	96.0623	89.3773	70.0549
10	94.577	96.0954	90.0217	72.3427	83.0645	87.9032	68.5484	40.3226	82.6087	91.3043	73.913	39.1304	92.7656	94.9634	86.9048	67.3077
11	95.6616	97.2885	91.6486	72.6681	84.6774	85.4839	76.6129	43.5484	84.7826	89.1304	73.913	32.6087	93.956	95.6044	89.1941	67.674
12	94.4685	96.0954	90.3471	75.1627	87.0968	91.9355	79.0323	42.7419	84.7826	93.4783	71.7391	45.6522	93.2234	95.5128	88.2784	70.2381
13	96.4208	98.0477	94.0347	74.0781	83.0645	86.2903	75	43.5484	82.6087	80.4348	63.0435	30.4348	94.3223	95.9707	90.5678	68.7729
14	94.1432	96.3124	91.1063	70.6074	84.6774	89.5161	70.9677	43.5484	78.2609	86.9565	73.913	32.6087	92.3993	95.1465	88.0952	65.9341
15	96.0954	97.397	91.3232	74.4035	80.6452	85.4839	73.3871	44.3548	80.4348	91.3043	71.7391	41.3043	93.6813	95.7875	88.4615	69.5971
16	95.2278	96.4208	91.3232	70.282	83.0645	86.2903	76.6129	47.5806	80.4348	89.1304	71.7391	36.9565	93.2234	94.9634	88.8278	66.3004
17	94.6855	96.3124	89.3709	71.2581	85.4839	90.3226	78.2258	48.3871	78.2609	86.9565	67.3913	32.6087	92.9487	95.2381	87.1795	67.033
18	95.6616	96.8547	90.8894	73.5358	87.9032	92.7419	80.6452	44.3548	76.087	91.3043	67.3913	32.6087	93.956	96.1538	88.7363	68.4982
19	95.7701	96.7462	89.9132	72.2343	81.4516	84.6774	68.5484	41.9355	93.4783	93.4783	80.4348	43.4783	94.0476	95.2381	87.0879	67.5824
20	95.7701	97.9393	91.4317	71.9089	87.0968	88.7097	73.3871	48.3871	78.2609	91.3043	67.3913	34.7826	94.0476	96.6117	88.37	67.674
21	95.4447	96.8547	88.9371	68.9805	80.6452	85.4839	68.5484	39.5161	82.6087	95.6522	67.3913	39.1304	93.2234	95.5128	85.7143	64.3773
22	94.3601	97.0716	91.3232	73.6443	80.6452	79.8387	70.9677	47.5806	67.3913	80.4348	71.7391	39.1304	91.6667	94.4139	88.1868	69.2308
23	94.1432	96.6377	90.8894	73.4273	86.2903	89.5161	70.9677	45.1613	73.913	86.9565	65.2174	43.4783	92.3993	95.4212	87.5458	68.956
24	94.7939	96.6377	90.0217	71.8004	90.3226	87.9032	72.5806	52.4194	84.7826	84.7826	71.7391	30.4348	93.8645	95.1465	87.2711	67.8571
25	95.0108	96.3124	90.6725	72.6681	86.2903	91.9355	66.9355	43.5484	76.087	80.4348	63.0435	39.1304	93.2234	95.1465	86.8132	67.9487
26	95.0108	97.6139	91.8655	72.6681	89.5161	87.9032	75.8065	45.1613	78.2609	91.3043	76.087	43.4783	93.6813	96.2454	89.3773	68.315
27	95.2278	97.0716	92.1909	74.1866	83.0645	83.0645	65.3226	42.7419	89.1304	95.6522	71.7391	39.1304	93.5897	95.4212	88.2784	69.1392
28	95.8785	96.9631	92.5163	72.2343	91.9355	92.7419	78.2258	50.8065	84.7826	93.4783	67.3913	26.087	94.9634	96.337	89.8352	67.8571
29	95.3362	96.6377	90.9978	71.8004	83.871	82.2581	66.9355	37.9032	84.7826	86.9565	71.7391	32.6087	93.5897	94.5971	87.4542	66.3004
30	93.4924	95.6616	89.8048	73.3189	84.6774	93.5484	76.6129	51.6129	82.6087	80.4348	73.913	34.7826	92.033	94.7802	87.6374	69.2308
31	94.6855	97.18	91.974	72.7766	83.871	84.6774	69.3548	43.5484	80.4348	86.9565	71.7391	41.3043	92.8571	95.3297	88.5531	68.1319
32	93.9262	95.8785	90.0217	70.4989	84.6774	87.0968	77.4194	53.2258	73.913	80.4348	60.8696	30.4348	92.033	94.2308	87.3626	66.8498
33	95.6616	97.18	92.8416	72.4512	84.6774	86.2903	76.6129	50.8065	73.913	89.1304	80.4348	30.4348	93.4982	95.6044	90.4762	68.2234
34	95.0108	96.7462	92.2993	71.8004	79.0323	86.2903	69.3548	43.5484	84.7826	91.3043	76.087	36.9565	92.7656	95.3297	89.011	67.1245
35	95.5531	97.397	91.5401	70.8243	84.6774	87.9032	73.3871	48.3871	78.2609	84.7826	63.0435	36.9565	93.5897	95.7875	88.2784	66.8498
36	95.2278	96.3124	90.0217	73.9696	89.5161	91.129	73.3871	45.9677	71.7391	84.7826	60.8696	43.4783	93.5897	95.2381	86.9048	69.5055
37	94.577	96.5293	90.564	72.7766	89.5161	92.7419	76.6129	43.5484	71.7391	78.2609	56.5217	34.7826	93.0403	95.3297	87.5458	67.8571
38	94.7939	96.8547	91.1063	71.4751	91.9355	95.9677	81.4516	50.8065	78.2609	84.7826	69.5652	39.1304	93.7729	96.2454	89.1026	67.7656
39	95.5531	97.397	91.757	72.9935	84.6774	87.0968	70.9677	44.3548	78.2609	95.6522	65.2174	36.9565	93.5897	96.1538	88.2784	68.2234
40	95.1193	96.0954	91.2148	72.1258	89.5161	89.5161	80.6452	52.4194	73.913	86.9565	76.087	41.3043	93.5897	94.9634	89.3773	68.5897
41	96.0954	96.8547	90.1302	73.6443	85.4839	87.9032	70.1613	47.5806	82.6087	86.9565	71.7391	28.2609	94.3223	95.4212	87.0879	68.7729
42	95.4447	96.7462	89.8048	70.282	83.0645	87.0968	73.3871	41.129	73.913	89.1304	71.7391	39.1304	93.1319	95.3297	87.1795	65.6593
43	94.6855	96.9631	90.0217	71.8004	79.8387	82.2581	64.5161	38.7097	82.6087	86.9565	67.3913	36.9565	92.4908	94.8718	86.1722	66.5751
44	95.5531	96.9631	90.7809	73.8612	87.0968	90.3226	79.0323	45.1613	65.2174	84.7826	58.6957	39.1304	93.315	95.696	88.0952
45	94.4685	96.7462	91.8655	76.898	85.4839	87.0968	66.9355	42.7419	76.087	95.6522	71.7391	41.3043	92.674	95.6044	88.1868	71.5201
46	94.4685	96.9631	90.7809	69.9566	89.5161	88.7097	72.5806	44.3548	84.7826	95.6522	82.6087	45.6522	93.4982	95.9707	88.37	66.0256
47	93.7093	96.3124	90.1302	71.5835	87.0968	91.9355	76.6129	49.1935	76.087	84.7826	71.7391	41.3043	92.2161	95.3297		67.7656
48	95.8785	97.7223	91.1063	72.4512	87.9032	89.5161	75	44.3548	73.913	91.3043	73.913	32.6087	94.0476	96.5201	88.5531	67.5824
49	94.6855	97.18	90.564	71.0412	88.7097	90.3226	72.5806	47.5806	78.2609	91.3043	63.0435	36.9565	93.315	96.1538	87.3626	66.9414
50	95.5531	97.8308	91.5401	71.9089	85.4839	90.3226	74.1935	44.3548	78.2609	91.3043	86.9565	43.4783	93.6813	96.7033	89.3773	67.5824
Average	95.026	96.8351	91.0065	72.2907	85.4194	88.2742	73.3065	45.3871	79.1739	88.3043	70.087	37.7391	93.2674	95.5037	88.1214	67.7525
STDEV	0.661738	0.558091	0.994978	1.5317	3.13753	3.1811	4.08702	3.96099	5.66019	4.70761	6.63986	5.35676	0.69403	0.570013	1.04946	1.37197
N	50	50	50	50	50	50	50	50	50	50	50	50	50	50	49	49

## Sheet: G
Supplemental Table S5. MEI discovery algorithm comparisons.
(G) Sensitivity of Mobster with 50 simulated human genomes
Run ID	% MEIs Properly Ascertained (DNF = Did not finish)												% Aggregate Ascertained (DNF = Did not finish)
	60X Alu	30X Alu	15X Alu	7.5X Alu	60X L1	30X L1	15X L1	7.5X L1	60X SVA	30X SVA	15X SVA	7.5X SVA	60X	30X	15X	7.5X
1	66.0521	63.9913	60.7375	54.1215	72.5806	70.9677	66.129	64.5161	69.5652	69.5652	69.5652	65.2174	66.9414	65.0183	61.7216	55.7692
2	67.0282	65.0759	62.7983	53.4707	70.1613	69.3548	65.3226	59.6774	65.2174	65.2174	63.0435	63.0435	67.3077	65.5678	63.0952	54.5788
3	65.9436	64.5336	61.9306	55.2061	71.7742	70.9677	68.5484	66.9355	73.913	73.913	71.7391	71.7391	66.9414	65.6593	63.0952	57.2344
4	65.2928	63.1236	60.3037	52.7115	68.5484	66.9355	63.7097	60.4839	63.0435	60.8696	60.8696	58.6957	65.5678	63.4615	60.7143	53.8462
5	68.4382	65.8351	62.9067	56.6161	66.9355	64.5161	62.0968	59.6774	56.5217	54.3478	52.1739	50	67.7656	65.2015	62.3626	56.685
6	65.0759	63.2321	61.1714	53.3623	69.3548	68.5484	62.9032	61.2903	69.5652	69.5652	67.3913	63.0435	65.7509	64.1026	61.63	54.6703
7	63.5575	61.7137	59.9783	51.8438	65.3226	64.5161	61.2903	60.4839	63.0435	58.6957	56.5217	56.5217	63.7363	61.9048	59.9817	53.022
8	68.2213	66.8113	64.6421	57.3753	75.8065	74.1935	73.3871	70.9677	71.7391	69.5652	67.3913	65.2174	69.2308	67.7656	65.7509	59.2491
9	64.0998	62.3644	60.6291	53.9046	70.1613	69.3548	66.9355	62.0968	89.1304	82.6087	82.6087	80.4348	65.8425	64.011	62.2711	55.9524
10	64.859	63.1236	60.3037	53.0369	70.1613	67.7419	66.129	63.7097	73.913	71.7391	67.3913	63.0435	65.8425	64.011	61.2637	54.6703
11	69.8482	68.7636	66.7028	58.8937	65.3226	63.7097	62.9032	59.6774	71.7391	71.7391	69.5652	69.5652	69.4139	68.315	66.3919	59.4322
12	DNF	65.4013	62.3644	54.9892	DNF	75	72.5806	68.5484	DNF	71.7391	67.3913	65.2174	DNF	66.7582	63.7363	56.9597
13	68.7636	66.4859	63.2321	55.423	68.5484	66.129	63.7097	61.2903	73.913	71.7391	71.7391	65.2174	68.956	66.6667	63.6447	56.5018
14	61.8221	60.4121	57.5922	51.1931	64.5161	61.2903	58.0645	55.6452	71.7391	67.3913	67.3913	67.3913	62.5458	60.8059	58.0586	52.381
15	64.3167	62.6898	60.846	54.6638	71.7742	70.9677	66.9355	60.4839	73.913	69.5652	67.3913	65.2174	65.5678	63.9194	61.8132	55.7692
16	66.269	64.4252	61.0629	54.6638	65.3226	65.3226	64.5161	60.4839	67.3913	67.3913	65.2174	63.0435	66.2088	64.652	61.63	55.6777
17	65.8351	64.3167	61.9306	53.5792	70.1613	68.5484	62.9032	60.4839	71.7391	71.7391	69.5652	69.5652	66.5751	65.1099	62.3626	55.0366
18	DNF	65.9436	63.449	55.423	DNF	65.3226	65.3226	63.7097	DNF	71.7391	71.7391	67.3913	DNF	66.1172	64.011	56.8681
19	DNF	62.7983	59.7614	52.1692	DNF	59.6774	56.4516	54.0323	DNF	58.6957	56.5217	56.5217	DNF	62.2711	59.2491	52.5641
20	67.8959	66.3774	63.9913	56.6161	72.5806	70.9677	70.1613	65.3226	76.087	76.087	73.913	71.7391	68.7729	67.3077	65.1099	58.2418
21	65.7267	63.8829	61.3883	53.6876	70.1613	69.3548	67.7419	66.9355	80.4348	78.2609	78.2609	73.913	66.8498	65.1099	62.8205	56.044
22	DNF	61.9306	59.8698	52.7115	DNF	64.5161	62.9032	59.6774	DNF	78.2609	78.2609	71.7391	DNF	62.9121	60.989	54.304
23	66.8113	65.0759	61.9306	53.1453	64.5161	63.7097	62.9032	61.2903	71.7391	69.5652	69.5652	69.5652	66.7582	65.1099	62.3626	54.7619
24	63.7744	61.7137	59.436	52.82	66.129	65.3226	61.2903	59.6774	71.7391	69.5652	65.2174	65.2174	64.3773	62.4542	59.8901	54.1209
25	66.5944	65.1844	62.5813	55.2061	77.4194	73.3871	71.7742	65.3226	73.913	71.7391	69.5652	63.0435	68.1319	66.3919	63.9194	56.685
26	DNF	65.4013	62.7983	53.9046	DNF	64.5161	61.2903	59.6774	DNF	82.6087	82.6087	78.2609	DNF	66.0256	63.4615	55.5861
27	67.3536	66.1605	64.0998	54.9892	61.2903	58.871	57.2581	54.8387	65.2174	60.8696	58.6957	58.6957	66.5751	65.1099	63.0952	55.1282
28	67.679	65.7267	63.3406	54.9892	75	74.1935	70.9677	67.7419	73.913	69.5652	67.3913	65.2174	68.7729	66.8498	64.3773	56.8681
29	68.5466	66.3774	63.449	57.4837	62.0968	58.0645	56.4516	52.4194	82.6087	76.087	76.087	76.087	68.4066	65.8425	63.1868	57.6923
30	63.6659	62.1475	60.5206	53.0369	66.9355	64.5161	62.9032	57.2581	65.2174	65.2174	65.2174	65.2174	64.1026	62.5458	60.989	54.0293
31	DNF	61.4967	59.2191	51.41	DNF	66.9355	62.0968	58.0645	DNF	73.913	73.913	71.7391	DNF	62.6374	60.1648	53.022
32	64.5336	63.2321	60.4121	52.9284	70.9677	66.129	64.5161	58.871	65.2174	63.0435	63.0435	63.0435	65.293	63.5531	60.989	54.0293
33	67.462	66.0521	63.3406	56.2907	69.3548	67.7419	64.5161	60.4839	67.3913	63.0435	58.6957	58.6957	67.674	66.1172	63.2784	56.8681
34	66.4859	65.5098	64.0998	55.5315	65.3226	65.3226	61.2903	56.4516	73.913	73.913	71.7391	71.7391	66.6667	65.8425	64.1026	56.3187
35	66.5944	65.6182	63.1236	57.2668	65.3226	63.7097	63.7097	57.2581	63.0435	60.8696	58.6957	56.5217	66.3004	65.2015	63.0037	57.2344
36	DNF	63.3406	61.8221	54.2299	DNF	64.5161	61.2903	58.871	DNF	60.8696	58.6957	52.1739	DNF	63.37	61.63	54.6703
37	67.2451	64.6421	62.3644	54.8807	72.5806	72.5806	70.9677	65.3226	69.5652	65.2174	60.8696	58.6957	67.9487	65.5678	63.2784	56.2271
38	66.3774	65.4013	62.256	55.6399	74.1935	73.3871	70.1613	66.129	80.4348	78.2609	76.087	69.5652	67.8571	66.8498	63.7363	57.4176
39	65.0759	62.9067	60.7375	54.013	69.3548	67.7419	63.7097	58.871	69.5652	69.5652	69.5652	60.8696	65.7509	63.7363	61.4469	54.8535
40	66.3774	64.6421	61.9306	53.1453	71.7742	72.5806	70.9677	65.3226	65.2174	60.8696	58.6957	58.6957	66.9414	65.3846	62.8205	54.7619
41	66.269	65.4013	62.3644	55.7484	70.1613	67.7419	66.9355	62.9032	71.7391	71.7391	69.5652	65.2174	66.9414	65.9341	63.1868	56.9597
42	62.4729	60.6291	59.3275	53.5792	70.1613	68.5484	68.5484	66.9355	65.2174	65.2174	65.2174	63.0435	63.4615	61.7216	60.6227	55.4945
43	65.0759	62.7983	60.0868	53.3623	65.3226	61.2903	58.0645	56.4516	65.2174	65.2174	60.8696	54.3478	65.1099	62.7289	59.8901	53.7546
44	66.269	64.0998	61.9306	56.6161	66.9355	66.129	62.0968	61.2903	69.5652	69.5652	69.5652	65.2174	66.4835	64.5604	62.2711	57.5092
45	66.3774	64.4252	62.5813	55.2061	70.9677	68.5484	68.5484	62.9032	69.5652	69.5652	67.3913	63.0435	67.033	65.1099	63.4615	56.4103
46	65.1844	63.5575	60.846	53.7961	71.7742	71.7742	70.1613	66.129	73.913	71.7391	69.5652	67.3913	66.3004	64.8352	62.2711	55.7692
47	DNF	65.6182	62.6898	56.9414	DNF	69.3548	69.3548	64.5161	DNF	71.7391	69.5652	69.5652	DNF	66.3004	63.7363	58.3333
48	65.9436	64.2082	61.1714	54.5553	68.5484	65.3226	61.2903	58.0645	69.5652	65.2174	63.0435	58.6957	66.3919	64.3773	61.2637	55.1282
49	70.7158	68.872	66.3774	58.3514	74.1935	72.5806	67.7419	62.9032	69.5652	69.5652	69.5652	65.2174	71.0623	69.3223	66.6667	59.1575
50	DNF	65.4013	63.5575	56.1822	DNF	66.129	65.3226	59.6774	DNF	73.913	71.7391	69.5652	DNF	65.8425	64.1026	57.1429
Average	66.1446	64.3774	61.9197	54.6182	69.2565	67.371	64.9355	61.4355	70.6257	69.1739	67.5217	64.9565	66.6868	64.9194	62.4982	55.8278
STDEV	1.84678	1.84547	1.78705	1.76132	3.67885	4.05756	4.26186	3.98987	5.93606	6.09661	6.59395	6.37426	1.7096	1.76661	1.75703	1.68884
N	41	50	50	50	41	50	50	50	41	50	50	50	41	50	50	50

## Sheet: H
Supplemental Table S5. MEI discovery algorithm comparisons.
(H) Specificity of MELT with 50 simulated human genomes
Run ID	Individual MEI												Aggregate
	60X Alu	30X Alu	15X Alu	7.5X Alu	60X L1	30X L1	15X L1	7.5X L1	60X SVA	30X SVA	15X SVA	7.5X SVA	60X	30X	15X	7.5X
1	0.777815	0.339767	0	0	0.80648	0	0	0	0	0	0	0	0.748395	0.285455	0	0
2	1.33186	0.452983	0.116413	0	0	0	0	0	0	0	0	0	1.1236	0.381305	0.0978461	0
3	1.0045	0.566238	0.117091	0	0	0	0	0	0	0	0	0	0.845102	0.475726	0.0981323	0
4	0.678717	0.795417	0.117919	0.125622	0	0	0	0	0	0	0	0	0.571416	0.669827	0.099104	0.105704
5	0.896847	0.4556	0.11737	0.126265	0.812984	0	0	0	0	0	0	0	0.849041	0.383155	0.0985214	0.106272
6	1.21948	0.563063	0.116275	0	0.812984	0.812984	0.826482	0	0	0	0	0	1.12462	0.569258	0.1955	0
7	1.35291	0.572092	0	0	0	0	0	0	0	0	0	0	1.13962	0.481237	0	0
8	0.44993	0.340907	0.231487	0.12454	0.80648	0	0	0	0	0	0	0	0.473027	0.286806	0.194367	0.10439
9	1.76402	0.67338	0.114945	0	0.826482	0	0	0	0	0	0	0	1.58284	0.568706	0.0971824	0
10	0.904985	0.342089	0.11806	0.126427	0.826482	0.840347	0.833314	0	0	0	0	0	0.857971	0.384259	0.197818	0.1065
11	0.889857	0.226248	0.11655	0	0.819678	0	0	0	0	0	0	0	0.84426	0.190661	0.0980396	0
12	1.33927	0.681061	0	0	0.812984	0	0	0	0	0	0	0	1.22178	0.573628	0	0
13	0.995591	0.112617	0	0	1.60006	0.812984	0.819678	0	0	0	0	0	1.02518	0.189579	0.0967132	0
14	1.22361	0.567542	0.116826	0	0.826482	1.66669	0.869523	0	0	0	0	0	1.12679	0.670504	0.197438	0
15	1.1086	0.336709	0.115742	0	0.812984	0.812984	0	0	0	0	0	0	1.028	0.378079	0.0973716	0
16	1.67416	0.568196	0.116688	0.124841	0	0	0	0	0	0	0	0	1.41647	0.48032	0.0981376	0.10593
17	1.0045	0.454549	0	0	0	0	0	0	0	0	0	0	0.849886	0.384617	0	0
18	1.23873	0.458731	0	0	0	0	0	0	0	0	0	0	1.04067	0.384256	0	0
19	1.10499	0.337442	0.117791	0	0	0	0	0	0	0	0	0	0.934595	0.285159	0.099407	0
20	0.992252	0.336709	0	0.123462	0.80648	0.80648	0	0	0	0	0	0	0.930213	0.377367	0	0.103524
21	1.33927	0.566238	0	0	0	0	0	0	0	0	0	0	1.12993	0.478002	0	0
22	1.22625	0.340514	0	0	0	0	0	0	0	0	0	0	1.03671	0.287351	0	0
23	0.898891	0.342846	0	0	0.819678	0.826482	0	0	0	0	0	0	0.850674	0.384237	0	0
24	1.32738	0.792759	0.116275	0	0	0	0	0	0	0	0	0	1.12356	0.669221	0.098519	0
25	1.45089	0.788314	0.23338	0	0.819678	0	0	0	0	0	0	0	1.31579	0.664154	0.197245	0
26	0.902914	0.341694	0.11737	0	0	0	0	0	0	0	0	0	0.762615	0.28819	0.0983276	0
27	1.00668	0.338989	0	0	0.812984	0	0	0	0	0	0	0	0.94159	0.285719	0	0
28	1.44288	0.454026	0.232007	0	0	0	0	0	0	0	0	0	1.21953	0.382408	0.19588	0
29	1.0011	0.563063	0	0	0	0	0	0	0	0	0	0	0.849854	0.476643	0	0
30	0.791849	0.345211	0	0	1.5873	0.80648	0.819678	0	0	0	0	0	0.854695	0.386463	0.0994052	0
31	1.89316	0.794584	0.116275	0.126104	0.826482	0	0	0	0	0	0	0	1.69178	0.669884	0.0978444	0.105708
32	1.66662	0.453504	0.115742	0	0	0	0	0	0	0	0	0	1.40709	0.381671	0.0973722	0
33	1.54866	0.337092	0.115336	0	0	0	0	0	0	0	0	0	1.30353	0.283563	0.0968019	0
34	1.5419	0.224981	0.231216	0	1.65285	0.840347	0	0	0	0	0	0	1.49118	0.28491	0.195123	0
35	1.33037	0.450959	0	0	0.80648	0.819678	0.819678	0	0	0	0	0	1.21268	0.474383	0.0973746	0
36	1.23591	0.570768	0.117231	0	0	0	0	0	0	0	0	0	1.04559	0.482622	0.0991057	0
37	1.56076	1.02507	0	0	0	0	0	0	0	0	0	0	1.31702	0.863736	0	0
38	0.890862	0.450959	0.11655	0.125476	0.812984	0.819678	0	0	0	0	0	0	0.845856	0.475285	0.0981354	0.105601
39	0.781257	0.337092	0	0	0	0	0	0	0	0	0	0	0.659762	0.285182	0	0
40	1.4445	0.338601	0.116413	0	0	0	0	0	0	0	0	0	1.223	0.285987	0.0982309	0
41	1.00554	0.342449	0	0	0	0	0	0	0	2.17383	0	0	0.849821	0.3846	0	0
42	0.891869	0	0	0.127873	0	0	0	0	0	0	0	0	0.756154	0	0	0.107872
43	1.33037	0.566889	0.34683	0.253805	0.862087	0	0	0	0	0	0	0	1.2241	0.481226	0.294122	0.213445
44	1.5504	0.563063	0	0.126265	1.68076	1.68076	0	0	0	0	0	0	1.50237	0.667308	0	0.106611
45	1.11236	0.452511	0	0	0.826482	0.826482	0.840347	0	0	0	0	0	1.03482	0.477578	0.0985252	0
46	1.56253	0.688847	0	0	0	0	0	0	0	0	0	0	1.32202	0.580823	0	0
47	1.00337	0.564999	0	0	0	0	0	0	0	0	0	0	0.845883	0.476212	0	0
48	1.1111	0.335182	0.116413	0	0	0	0	0	0	0	0	0	0.93808	0.282477	0.0981347	0
49	1.34078	0.226508	0.116688	0	0	0	0	0	0	0	0	0	1.12888	0.19048	0.0981365	0
50	1.10129	0.448441	0.115213	0.125782	0.819678	0	0.847501	0	0	0	0	0	1.02323	0.378438	0.194184	0.105817
Average	98.8151	99.5354	99.9209	99.9673	99.542	99.7526	99.8665	100	100	99.9565	100	100	98.9472	99.5778	99.9176	99.9725
STDEV	0.304552	0.189647	0.0827074	0.0613895	0.526125	0.45056	0.309119	0	0	0.307426	0	0	0.259355	0.159748	0.0750344	0.0516633
N	50	50	50	50	50	50	50	50	50	50	50	50	50	50	50	50

## Sheet: I
Supplemental Table S5. MEI discovery algorithm comparisons.
(I) Specificity of TEMP with 50 simulated human genomes
Run ID	Individual MEI												Aggregate
	60X Alu	30X Alu	15X Alu	7.5X Alu	60X L1	30X L1	15X L1	7.5X L1	60X SVA	30X SVA	15X SVA	7.5X SVA	60X	30X	15X	7.5X
1	0	0.136054	0	0	1.83486	0.961538	0	0	0	5.55556	0	0	0.237248	0.457143	0	0
2	0	0	0	0	0	0	0	0	0	0	0	0	0	0	0	0
3	0	0.264201	0.138696	0	0.909091	0	0	0	0	2.85714	2.94118	3.0303	0.117371	0.33557	0.235018	0.123916
4	0	0.260417	0.272851	0.14556	0.952381	0	0	0	0	0	0	0	0.117371	0.224467	0.235571	0.126263
5	0	0.13245	0	0	1	1.07527	0	0	0	0	0	0	0.118624	0.22805	0	0
6	0	0	0	0	0.990099	0	0	0	0	2.94118	2.94118	3.44828	0.120048	0.115075	0.11976	0.126582
7	0	0	0	0	0	0	0	0	0	3.125	0	0	0	0.11919	0	0
8	0.137931	0.265252	0.136986	0	0	0	0	0	3.125	3.125	3.22581	0	0.230681	0.337838	0.232558	0
9	0	0.263158	0	0	0	0	0	0	0	0	0	0	0	0.224215	0	0
10	0	0.134048	0	0	1.94175	0	0	0	3.125	2.7027	2.77778	3.125	0.352526	0.227273	0.118765	0.124069
11	0	0	0	0	0	0	0	0	0	2.77778	2.85714	0	0	0.111359	0.115473	0
12	0	0	0	0	0	0	0	0	0	2.85714	3.0303	3.0303	0	0.111235	0.117233	0.122249
13	0.133511	0.258398	0.134771	0	2.75229	1.0101	0	0	0	2.7027	3.0303	3.0303	0.44843	0.43956	0.230415	0.120773
14	0	0.27248	0.143472	0	1.04167	0	0	0	0	2.77778	0	0	0.121065	0.34965	0.123001	0
15	0	0.524246	0.136612	0	0.970874	0	0	0	0	2.77778	0	0	0.117647	0.558036	0.116414	0
16	0	0.13089	0.136799	0	0	0	0	0	0	6.66667	3.84615	0	0	0.3386	0.237248	0
17	0	0.132979	0	0	0	0	0	0	0	0	0	0	0	0.114155	0	0
18	0	0.386598	0	0	0.961538	0	0	0	0	2.85714	2.85714	3.0303	0.115473	0.440529	0.116144	0.122699
19	0	0	0	0	0	0	0	0	0	0	0	0	0	0	0	0
20	0	0.262812	0	0	0	0	0	0	0	0	0	0	0	0.223214	0	0
21	0	0.666667	0.417246	0.147929	0.952381	0	0	0	0	2.5	2.5641	0	0.117647	0.677201	0.468933	0.124069
22	0	0.136986	0	0	2.9703	0	0	0	0	2.77778	2.94118	2.94118	0.357143	0.2331	0.121359	0.126263
23	0	0.268097	0.275862	0.285714	0	0	0	0	3.0303	2.85714	3.0303	0	0.117233	0.344828	0.35503	0.246305
24	0	0.13369	0	0	0	0	0	0	0	3.0303	3.22581	3.22581	0	0.228571	0.119617	0.124844
25	0	0.789474	0.414365	0.146199	1.76991	0	0	0	0	0	0	0	0.232019	0.671892	0.351288	0.123916
26	0	0	0	0	1	0	0	0	0	5.12821	2.63158	0	0.115473	0.221729	0.116144	0
27	0	0.131062	0.136426	0.143678	0	0	0	0	0	0	0	0	0	0.113122	0.117925	0.123916
28	0	0.26178	0	0	0	0	0	0	0	0	0	0	0	0.222222	0	0
29	0	0	0	0	0	0	0	0	0	0	0	0	0	0	0	0
30	0	0.403769	0.277008	0.146199	0.990099	2.08333	0	0	0	6.25	3.22581	3.44828	0.119617	0.803674	0.355872	0.250627
31	0.140845	0.402685	0.140252	0.147929	1.92308	1	0	0	0	0	0	0	0.354191	0.455063	0.119332	0.126422
32	0	0.262467	0.138696	0.145985	1.88679	0	0	0	0	6.06061	0	0	0.232288	0.447427	0.118624	0.126582
33	0	0.259403	0.27248	0.141844	0	0	0	0	0	0	0	0	0	0.222965	0.233918	0.122249
34	0	0	0	0	1	2.08333	2.17391	0	0	0	0	0	0.117509	0.223964	0.233372	0
35	0	0.129366	0.137363	0.143266	0.980392	1.02041	1.1236	0	0	0	0	0	0.114943	0.221729	0.236686	0.124069
36	0	0.134048	0.140056	0.146843	0	0	0	0	3.33333	0	0	0	0.119332	0.114943	0.120627	0.126103
37	0	0	0	0	0	0	0	0	0	0	0	0	0	0	0	0
38	0	0.65445	0.275482	0	1.0101	2.10526	0	0	2.85714	2.7027	2.7027	0	0.232288	0.892857	0.351288	0
39	0	0.262467	0.137363	0.145985	0	0	0	0	0	0	0	0	0	0.223214	0.117096	0.124378
40	0	0.265252	0.137741	0	0.934579	0	0	0	0	2.94118	3.22581	0	0.116822	0.337079	0.233645	0
41	0.140647	0.534759	0.280899	0.291545	0.970874	1.02041	0	0	0	2.85714	0	0	0.236128	0.681044	0.238663	0.248447
42	0	0	0	0	0.970874	1.0101	0	0	3.22581	5.88235	3.125	0	0.238095	0.344432	0.119474	0
43	0	0	0	0	0	0	0	0	0	2.94118	0	0	0	0.115875	0	0
44	0	0.262123	0.139082	0.14556	2.83019	1.04167	0	0	0	0	0	0	0.35461	0.337079	0.119048	0.124069
45	0	0.390117	0.13624	0	0.980392	1.02041	0	0	0	0	0	0	0.118483	0.444939	0.116686	0
46	0	0.530504	0.276625	0	0	0	0	0	2.85714	2.7027	2.77778	0	0.117509	0.560538	0.351288	0
47	0	0.397878	0.13986	0.144928	1.90476	0	0	0	0	4.87805	5.26316	2.85714	0.234467	0.558659	0.353774	0.2457
48	0	0.132626	0	0	0	0	0	0	0	0	0	0	0	0.113379	0	0
49	0	0.129199	0	0	0	0	0	0	0	0	0	0	0	0.110132	0	0
50	0	0.261097	0.136426	0.143266	0.943396	0	0	0	0	2.85714	0	0	0.114943	0.331858	0.116279	0.12285
Average	99.9889	99.7755	99.8978	99.9478	99.2525	99.6914	99.934	100	99.5689	97.9982	98.7556	99.3767	99.8829	99.6958	99.8563	99.9305
STDEV	0.037892	0.194596	0.117847	0.0815699	0.842422	0.60068	0.343181	0	1.08106	2.04747	1.58126	1.26225	0.120009	0.209783	0.123974	0.0799064
N	50	50	50	50	50	50	50	50	50	50	50	50	50	50	50	50

## Sheet: J
Supplemental Table S5. MEI discovery algorithm comparisons.
(J) Specificity of RetroSeq with 50 simulated human genomes
Run ID	Individual MEI												Aggregate
	60X Alu	30X Alu	15X Alu	7.5X Alu	60X L1	30X L1	15X L1	7.5X L1	60X SVA	30X SVA	15X SVA	7.5X SVA	60X	30X	15X	7.5X
1	1.14796	0.793651	0.712251	0	65.9509	58.6207	32.8767	9.09091	14	6.66667	0	0	19.9138	15.2542	5.98194	1.27479
2	0.632911	0.651042	0.426743	0.177305	65.9091	57.6132	33.3333	10	6.81818	4.87805	2.77778	0	18.4764	13.9734	5.79545	1.45985
3	1.01523	0.52356	0.422535	0.176678	65.8307	60	35.2564	9.18367	18	9.09091	4.87805	0	19.6197	15.5638	6.61521	1.43266
4	1.61893	1.8018	1.25	0.359066	65.9164	58.6345	30.9859	8.69565	13.3333	7.69231	0	0	19.327	15.3052	5.92841	1.47493
5	0.895141	0.526316	0.418994	0.350877	67.8899	57.377	32.1678	11.1111	19.1489	12.1951	0	0	20.5882	14.2584	5.49944	1.74927
6	0.772201	0.529801	0.283688	0.184843	66.6667	57.9167	36.1111	15.1515	18.3673	4.87805	0	0	19.2205	13.9961	6.1086	2.38806
7	0.262467	0	0.147493	0	64.1844	58.2278	34.9315	8.69565	7.69231	0	0	0	17.1745	13.7041	6.06768	1.21396
8	0.873908	0.63857	0.276625	0.174216	64.7436	55.8704	33.7662	15.4545	15.2174	9.52381	2.7027	0	18.6368	13.7127	6.01751	2.5
9	0.871731	0.768246	0.558659	0.183486	62.963	55	31.7568	11.9565	11.7647	10	2.22222	0	17.3762	13.352	5.72057	1.76991
10	0.516796	0.268097	0.13986	0.18018	65.8065	57.8947	35.7616	11.9565	8.69565	6.66667	0	0	18.7611	14.2582	6.07735	1.77778
11	0.37594	0.129366	0.274725	0	66.7742	60.4	32.8571	16.8421	13.3333	0	0	0	18.7337	14.3126	5.30387	2.2069
12	0.742574	0.759494	0.138122	0	67.5758	59.144	27.1429	8.16327	8.33333	0	0	0	19.6459	14.5221	4.32852	1.14449
13	1.10429	0.625782	0.268097	0.167224	68.1957	57.438	30.2817	8.88889	18.75	17.3913	5.12821	2.94118	20.2521	13.9834	5.07012	1.38504
14	0.888325	0.660502	0.567376	0	67.4419	56.6964	36.6197	15.0538	13.6364	11.9048	5.26316	0	19.0644	13.392	6.55367	2.07407
15	1	0.913838	0.696379	0.357143	63.8436	58.5551	40.7186	17.3077	14.8936	5	2.85714	0	18.2842	15.2479	8.04348	2.8777
16	0.375469	0.131406	0.140252	0.172117	64.7059	57.4468	30.4348	10	10.8696	5.12821	0	0	17.1958	13.3333	4.85876	1.43062
17	1.02171	0.65189	0.692521	0.178253	65.1466	54.5064	29.1667	12.5	21.7391	16.6667	5.55556	0	19.1901	13.3397	5.43237	1.75953
18	0.744417	0.757576	0.410959	0.348432	66.7732	58.4	31.4286	12.2449	18.75	11.3636	10	0	19.1945	14.4567	5.6044	1.983
19	0.515464	0.532623	0.28169	0.177936	64.2361	59.5041	34.058	7.95455	18.1818	5.26316	3.0303	0	17.7798	14.549	5.67537	1.1782
20	0.886076	0.396301	0.140056	0.174825	65.4952	56.3786	33.557	10.5263	13.3333	7.31707	2.5641	0	18.9895	13.7368	5.76497	1.56695
21	0.49505	0.513479	0.416089	0	66.0256	57.9167	31.1594	3.33333	10.4167	6.52174	0	0	18.4075	13.7089	5.10544	0.439883
22	1.13636	0.779221	0.41841	0.179211	66.875	60.7004	38.255	16.8539	14.2857	0	0	0	19.8105	15.1828	6.62983	2.34261
23	1.00376	0.52356	0.558659	0.172117	70.4478	60.6426	40.3846	14.8936	9.30233	2.63158	0	0	21.1064	14.843	7.39514	2.13068
24	1.02564	0.927152	0.424328	0.18622	61.6487	55.0661	32.1168	7.22892	11.1111	4.87805	0	0	16.7572	13.0987	5.32276	1.07527
25	0.890585	0.394737	0.413223	0.353357	63.4304	55.0201	25	8.69565	13.6364	7.31707	0	0	18.3494	13.619	4.21286	1.44928
26	0.254777	0.259067	0.138504	0.17301	64.7059	58.547	38.5135	15.2174	10.6383	6.66667	4.54545	0	17.306	13.5109	6.56455	2.11566
27	0.760456	0.522876	0.138122	0	68.7117	63.6029	40.8163	16.8539	20.4082	9.52381	2.63158	0	20.6186	16.7748	6.82068	2.15827
28	0.869565	0.384615	0.269179	0.176056	64.4737	55.4167	31.0345	8.51064	17.6471	11.1111	2.5641	0	18.2759	13.2394	5.17799	1.29683
29	0.503145	0.391645	0.420757	0.344828	66.0377	58.9431	41.2903	20.4082	10.6383	0	0	0	18.8793	14.0818	7.38699	3.07692
30	0.514801	0.398936	0.285714	0	66.4495	60.3239	34.0426	9.89011	19.1489	7.69231	5.55556	0	19.1866	14.9326	5.9293	1.33531
31	0.383142	0.26178	0.141243	0.18622	64.6865	59.7701	36.3014	12.6437	18	6.66667	0	0	18.3099	15.0467	6.04027	1.82094
32	0.622665	0.636943	0.414365	0.357143	65.2866	56.6802	32.4675	9.89011	14.2857	7.89474	0	0	18.6368	13.8318	5.82418	1.62003
33	0.868486	0.63857	0.686813	0	68.4375	59.4378	37.0861	8.43373	8.88889	11.1111	5.12821	0	19.6413	14.6704	6.86275	1.01744
34	0.883838	0.39267	0.277778	0.177936	65.0519	57.2052	29.3651	9.41176	4.54545	0	0	0	17.5111	12.9845	4.41176	1.32353
35	0.628931	0.388098	0.277008	0.170358	64.6688	60.076	40.1274	8.53659	15.5556	10	5.55556	0	18.7554	15.3346	7.3224	1.14286
36	1.04031	0.942127	0.585652	0.183824	66.1238	58.4677	37.9085	10	22.449	5.26316	5.55556	0	19.7333	14.966	7.33945	1.51057
37	0.89172	0.922266	0.705219	0.520833	63.8978	56.4885	31.8182	6.52174	5.40541	2.77778	0	0	18.4141	14.7588	6.02007	1.2894
38	0.760456	0.527009	0.27972	0.350877	66.8693	57.7075	37.8882	10.5263	17.0213	15.2174	7.14286	0	20.0858	14.8393	7.18954	1.7192
39	0.618812	0.774194	0.277008	0.357143	64.2361	57.384	36.9863	9.57447	24.0741	15.5556	5	3.0303	17.6522	14.0965	6.38767	1.74672
40	0.631313	0.514801	0.414365	0	63.3987	55.6911	32.4503	7.6087	10.4167	5	2.5641	0	17.801	13.4525	5.79869	1.02041
41	1.02564	0.793651	0.280899	0.353357	66.9811	60.1533	34.8684	8.51064	8.88889	8.88889	0	0	19.685	15.725	6.09081	1.43678
42	0.765306	0.650195	0.281294	0	66.1238	57.563	31.4685	11.2245	24	7.5	2.63158	0	19.369	13.8491	5.38117	1.5873
43	0.766284	0.397351	0.42796	0	66.1184	60.2317	40.6667	11.3636	2.5641	2.7027	0	0	18.4725	15.2236	7.1991	1.51515
44	1.1509	0.660502	0.282087	0.177305	68.4211	59.4262	36.0544	11.236	7.69231	7.69231	2.85714	0	20.3671	14.7115	6.28507	1.61054
45	0.763359	0.787402	0.834492	0.34904	66.0194	59.6708	34.6939	7.69231	11.1111	0	0	0	18.8596	14.4636	6.33333	1.2894
46	1.03359	0.8	0.561798	0.180832	62.069	56.8	33.5484	14.5833	14	6.66667	0	0	17.5045	14.4498	6.1742	2.18659
47	0.383632	0	0.139665	0.170648	65.2997	57.6471	32.4503	14	19.6078	11.6279	7.5	2.85714	19.1304	14.3396	5.84344	2.21914
48	0.639386	0.396301	0.282885	0.172712	66.4407	59.0517	36.8056	10.5882	9.52381	7.31707	0	0	18.3199	13.8835	6.19369	1.43885
49	0.878294	0.779221	0.137552	0.17762	66.3492	58.498	32.1918	7.69231	21.1538	11.9048	2.77778	0	19.5017	14.9296	5.39054	1.16448
50	0.883838	0.388601	0.280505	0	64.9518	60.7692	38.7097	14.2857	16.3265	2.43902	0	0	18.8368	15.0979	6.83572	2.00573
Average	99.2133	99.4239	99.614	99.8233	34.2743	41.7895	65.6064	88.8603	86.048	92.9161	97.8202	99.8234	81.1458	85.642	93.9617	98.3453
STDEV	0.26691	0.291693	0.221449	0.132976	1.70958	1.83781	3.70796	3.39399	5.18418	4.48043	2.59383	0.706206	0.989696	0.793694	0.824318	0.501586
N	50	50	50	50	50	50	50	50	50	50	50	50	50	50	50	50

[truncated: 3 more sheets: K, L, Legend]
