# Supplementary material for: The Mobile Element Locator Tool (MELT): population-scale mobile element discovery and biology
Source: Genome Res. 2017 Nov;27(11):1916–29. doi: 10.1101/gr.218032.116 (PMC5668948; doi:10.1101/gr.218032.116)
Supplement: Supplemental Material [file supp_gr.218032.116_Supplemental_Table_S6.xlsx]

## Sheet: A
Supplemental Table S6. In silico assessment of MELT accuracy and features.
(A) Tranche distributions at various sequence coverage levels
Tranche	Alu				L1				SVA
	7.5x	15x	30x	60x	7.5x	15x	30x	60x	7.5x	15x	30x	60x
5	0.597395	0.800988	0.883705	0.916708	0.375614	0.641626	0.837724	0.912683	0.374359	0.680476	0.857333	0.934667
4	0.173282	0.0952471	0.0548182	0.0368869	0.220526	0.142602	0.0660163	0.0320325	0.241538	0.165714	0.0591111	0.0253333
3	0.16848	0.0944235	0.0566591	0.0382307	0.22	0.134634	0.0647154	0.0343089	0.217949	0.144286	0.0631111	0.0311111
2	0.00444444	0.00195294	0.000590909	0.000223964	0.0580702	0.015122	0.00211382	0.000487805	0.06	0.0133333	0	0
1	0.00158365	0.00145882	0.000727273	0.000358343	0.00403509	0.00308943	0.00097561	0.000650407	0.0025641	0.000952381	0.00133333	0.000444444
0	0.0661303	0.0128235	0.00209091	0.000515118	0.0977193	0.021626	0.00357724	0.000813008	0.0841026	0.0161905	0.000888889	0

## Sheet: B
Supplemental Table S6. In silico assessment of MELT accuracy and features.
(B) Breakpoint accuracy at various sequence coverages
Alu				L1				SVA
7.5x	15x	30x	60x	7.5x	15x	30x	60x	7.5x	15x	30x	60x
-31	114	78	0	99	-20	-67	0	-16	2	0	0
55	-23	-18	0	-24	-78	0	0	-72	0	0	0
23	14	-4	0	-20	-67	0	0	-37	0	0	0
-9	-26	0	0	-18	1	0	1	-34	0	0	1
151	-44	0	1	-22	0	0	0	-14	-22	1	2
-58	116	0	0	-23	-7	0	1	-17	0	2	0
-42	-55	0	0	1	0	0	0	1	0	0	0
-16	-51	0	2	1	1	0	0	1	1	0	1
90	-135	0	0	1	0	0	0	-1	0	1	0
-12	-59	0	1	1	0	1	0	2	1	0	0
-10	-88	1	0	0	2	0	0	0	0	0	0
-9	182	0	0	0	0	0	0	0	0	0	0
66	0	0	1	0	0	1	4	1	0	0	0
146	0	-8	0	0	0	0	0	0	0	0	0
-18	0	0	0	0	-7	0	0	0	0	0	0
49	0	2	3	0	0	0	0	0	0	0	0
16	1	0	0	0	0	0	4	0	0	0	0
-85	0	2	0	1	0	0	0	0	-13	0	-13
21	1	0	3	0	0	4	0	1	0	-13	0
-26	0	0	2	2	0	0	0	0	0	0	0
78	1	0	2	0	0	0	0	0	0	0	0
26	0	0	0	0	1	0	0	0	0	0	0
-33	0	0	0	-7	1	4	-4	0	0	0	0
35	0	1	0	0	1	0	0	0	0	0	0
88	-8	0	0	-66	0	0	0	0	1	0	0
-8	0	0	0	0	1	0	-8	0	0	0	0
-18	0	0	0	0	0	0	0	0	0	0	0
-112	2	0	0	0	1	0	0	1	0	0	0
9	0	0	0	0	0	-4	0	0	0	0	1
-8	0	3	0	0	0	0	1	1	1	1	0
-30	0	0	0	1	0	0	0	0	0	0	0
-29	2	0	0	0	0	-8	0	0	1	0	0
70	0	0	0	0	0	0	0	-39	0	0	0
26	0	0	1	0	4	0	2	-33	0	0	0
50	0	3	1	1	0	0	1	62	7	0	0
-18	0	0	0	0	0	1	0	12	1	0	0
-43	1	2	1	1	0	0	0	-150	1	-12	-12
-20	0	2	1	0	4	0	0	1	0	1	1
-11	0	0	1	0	0	2	0	2	1	0	0
3	0	0	0	0	0	1	1	1	0	0	0
-74	0	0	0	0	0	0	0	0	0	1	0
-18	0	0	0	0	0	0	1	0	0	0	1
-143	3	0	0	4	0	0	0	1	0	2	0
14	0	0	0	0	0	0	0	0	0	0	2
-49	0	0	1	0	-8	1	0	0	0	0	0
-20	0	0	0	4	0	0	0	0	1	0	0
-66	0	0	1	0	0	0	0	1	2	0	0
-13	1	0	0	0	0	0	0	3	3	0	1
18	2	0	0	0	0	0	0	0	2	1	0
11	0	0	0	1	1	0	0	2	0	0	2
-39	0	1	0	0	0	0	-4	0	0	2	3
-197	2	0	0	0	0	0	0	0	1	3	2
-198	0	1	-14	1	0	-4	0	0	2	2	0
97	0	0	0	0	1	0	0	4	0	0	0
64	3	0	2	0	0	0	-13	1	0	0	1
1	0	0	1	0	0	-13	0	0	0	1	0
1	2	1	0	0	0	0	-6	0	0	2	2
0	0	1	0	0	0	0	0	0	0	1	1
0	2	1	0	0	0	0	0	0	0	1	1
0	1	1	0	0	0	0	0	-101	4	0	0
0	0	1	0	0	0	0	0	-29	1	0	0
1	2	0	2	1	0	1	0	53	0	0	0
0	0	0	-13	-14	-13	0	1	-6	1	0	0
0	0	0	0	0	0	1	0	5	0	0	0
0	0	0	0	1	0	0	1	1	0	0	0
0	0	1	1	1	0	-4	0	0	0	0	0
1	0	0	2	0	0	1	-4	0	0	0	0
1	0	1	0	0	1	0	1	1	0	4	0
0	0	0	0	0	0	-14	0	0	1	1	0
0	0	0	0	0	0	0	-14	0	0	0	4
0	0	0	0	1	-4	1	0	0	0	0	1
1	0	0	0	0	1	1	1	0	0	1	0
0	0	0	1	1	-14	0	1	1	-3	0	0
0	1	-14	0	0	0	0	0	0	1	0	1
0	1	0	1	0	1	1	0	0	0	0	0
0	0	2	3	0	1	0	0	0	0	0	0
0	0	1	0	0	0	1	0	0	0	0	0
1	0	0	1	1	0	0	1	0	0	0	1
-27	0	0	0	0	1	0	0	0	0	0	0
0	1	0	1	0	0	0	1	0	0	1	0
0	0	0	0	2	0	1	0	0	0	0	0
0	3	0	1	0	0	1	0	0	0	0	0
0	0	2	0	1	1	0	0	0	0	1	0
1	0	-13	0	1	0	0	1	0	0	0	1
0	0	0	0	-176	0	1	1	1	0	-3	0
0	1	0	0	24	1	0	0	0	0	-66	0
-8	1	1	1	5	0	0	0	0	0	0	1
0	0	2	0	-65	0	0	1	0	1	0	0
0	0	0	1	13	0	1	0	1	0	0	-3
0	1	0	0	15	0	0	0	0	0	0	0
0	1	0	0	14	0	0	0	61	0	3	0
1	1	0	0	1	0	0	1	-10	0	0	3
6	0	0	0	75	0	0	0	45	1	0	0
0	0	1	1	-33	0	0	0	44	0	0	0
0	0	0	0	-12	0	0	0	-9	0	0	0
2	1	1	0	-36	0	0	0	3	1	0	0
1	0	3	0	1	1	0	0	-7	1	0	0
0	1	0	0	7	0	0	0	1	0	1	0
0	0	1	0	2	0	0	0	2	1	0	0
0	0	0	0	1	2	1	0	-2	1	0	0
0	0	1	0	1	0	0	0	0	0	0	1
0	0	0	0	1	1	1	0	0	0	0	0
1	-14	1	0	0	0	0	0	-8	0	0	0
0	0	0	0	0	0	2	1	0	0	0	0
0	2	0	0	1	0	0	2	1	0	1	0
2	1	0	0	1	1	1	0	0	0	0	0
0	0	1	0	0	2	0	1	0	0	0	0
2	0	1	0	0	-66	0	0	0	0	1	1
1	0	0	1	0	1	0	2	0	0	0	0
1	0	0	0	3	35	1	0	0	1	1	0
0	2	0	0	0	-36	2	1	0	0	1	0
0	-13	0	0	0	-1	5	0	0	45	1	1
1	0	1	0	0	1	-1	0	0	1	0	0
0	0	0	0	0	1	0	0	0	1	0	1
0	1	0	1	0	0	0	1	0	2	0	1
0	2	0	2	0	0	0	2	2	0	0	1
0	0	0	0	1	0	0	5	1	0	0	0
0	0	0	0	0	0	0	-1	0	0	0	0
1	0	0	1	1	0	0	0	0	0	0	0
1	0	0	0	1	0	-11	0	-10	1	0	0
0	1	0	0	0	0	0	0	0	0	0	0
0	0	0	0	0	0	0	-11	21	0	0	0
2	1	0	1	0	1	1	0	-86	0	0	0
1	3	0	0	0	0	6	0	1	0	1	0
0	0	0	0	1	1	0	1	1	0	0	0
0	1	0	2	0	0	0	6	1	0	0	0
0	0	0	0	-11	0	1	0	0	0	0	0
0	1	1	1	0	0	0	0	1	0	0	0
0	0	0	0	0	1	0	1	1	0	0	-5
0	0	0	0	0	0	0	0	0	0	0	1
1	0	0	0	0	-11	0	0	0	3	1	0
0	1	0	2	0	0	0	0	5	0	2	0
0	0	0	0	0	0	0	0	0	0	2	0
0	0	1	0	0	1	1	0	1	0	-2	0
0	0	2	0	0	6	0	0	1	0	0	1
0	0	0	0	0	0	0	1	0	0	0	2
0	0	0	1	-5	0	1	0	1	0	0	2
1	0	1	0	0	1	0	0	0	1	0	-2
0	0	0	0	0	0	-5	1	0	0	0	0
0	0	0	0	0	0	0	0	0	2	-4	2
2	0	0	0	0	0	1	-5	0	1	0	0
1	0	1	0	3	0	0	0	0	0	0	0
0	0	0	1	2	0	1	1	0	0	0	0
2	0	0	0	0	0	0	0	0	-10	3	0
0	0	2	0	0	1	0	1	0	0	0	0
0	0	0	-9	0	0	0	0	-10	1	0	-4
1	0	1	0	2	1	0	0	1	-70	0	0
0	0	0	0	0	0	0	0	0	0	0	0
0	0	0	0	0	-5	0	0	0	1	0	0
2	0	0	0	1	0	0	0	0	0	0	3
0	0	2	0	0	1	0	0	0	1	0	0
0	0	0	0	0	0	0	0	0	0	0	0
0	0	0	2	0	0	0	0	-40	1	0	0
1	1	0	0	0	0	3	0	2	1	1	0
0	2	0	0	0	0	2	0	0	1	0	0
1	0	1	0	0	0	0	0	0	0	1	0
0	0	0	0	0	3	3	0	0	0	2	0
0	1	0	0	0	2	1	3	0	1	1	0
0	0	0	0	1	0	0	2	2	1	0	0
1	0	0	1	0	3	0	0	1	0	0	0
0	0	1	0	0	0	0	3	0	0	0	1
1	1	0	0	0	0	0	1	1	0	-10	0
0	0	0	0	1	0	0	0	3	4	-10	1
1	0	-9	0	0	0	2	0	0	0	0	2
-8	2	0	0	2	2	0	0	1	0	0	1
0	0	0	0	0	0	0	0	1	0	1	0
0	1	0	1	0	0	0	0	0	0	0	0
0	0	0	0	1	1	1	2	0	0	0	0
0	0	0	2	0	1	1	0	0	0	5	-10
0	0	0	0	0	0	0	0	0	0	0	-10
-10	2	2	0	0	0	0	0	0	0	0	0
0	0	0	0	0	0	0	1	0	99	10	0
0	0	0	0	2	0	0	1	0	-10	1	1
0	0	0	0	-47	0	0	0	0	0	1	0
1	1	0	1	-21	0	0	0	1	2	0	0
0	0	0	0	18	1	0	0	1	1	1	50
3	0	0	0	-50	0	0	0	-15	0	0	0
0	0	1	1	-20	0	0	0	-193	0	1	0
0	0	0	0	-15	0	0	0	1	0	0	10
0	1	0	0	77	0	1	0	1	0	0	1
1	0	0	7	42	0	0	0	1	0	4	1
0	0	0	-4	-16	0	1	0	10	0	0	0
1	-9	0	0	-31	0	0	0	0	1	0	1
1	0	0	0	1	1	0	0	0	0	0	0
1	0	1	1	1	0	0	1	1	0	0	1
0	0	0	0	1	0	0	0	0	0	0	0
0	0	2	0	1	0	1	1	0	1	0	0
0	0	0	1	1	0	0	0	0	0	0	4
0	0	0	0	1	1	0	0	0	3	0	0
0	2	0	0	0	0	0	0	2	1	1	0
0	0	0	0	3	0	0	0	0	0	1	0
1	0	0	0	1	2	0	1	0	0	0	0
0	0	1	0	0	0	0	0	0	1	0	0
0	0	0	0	0	0	0	0	0	0	0	0
0	0	0	0	1	0	0	0	0	1	-10	0
1	0	1	0	0	1	1	0	0	0	0	0
-14	1	0	0	0	0	0	0	0	0	2	0
0	0	0	0	0	0	0	0	0	2	0	1
2	0	7	0	0	0	0	0	0	1	1	1
0	0	0	0	1	0	0	0	0	1	0	0
0	0	0	3	0	0	0	0	0	0	1	0
2	0	1	0	0	0	0	1	0	0	0	0
-13	1	0	0	0	0	1	0	1	0	1	-10
1	2	0	0	0	0	0	0	0	0	0	0
0	0	0	0	1	2	0	0	1	0	0	2
0	0	0	0	0	-20	0	0	0	0	0	0
0	0	0	0	0	-31	2	0	1	0	1	1
0	0	0	0	0	1	0	0	1	0	0	0
1	1	0	0	1	0	0	1	77	0	0	1
0	0	0	0	137	3	0	0	63	0	0	0
3	0	0	0	0	1	1	0	3	0	1	1
0	1	0	-4	0	0	1	0	0	0	0	0
1	0	0	0	1	1	0	0	0	0	0	0
1	7	0	0	0	0	0	2	2	0	0	0
0	0	0	0	0	0	0	0	0	1	1	1
0	0	3	0	0	0	0	0	0	1	0	0
0	1	0	0	-14	1	1	0	0	0	0	0
0	0	0	0	0	0	0	0	0	-22	0	0
0	0	0	0	0	0	0	1	0	0	0	0
0	0	0	0	1	1	0	1	2	1	1	0
0	0	0	0	1	2	2	0	0	0	0	0
0	0	0	0	1	1	1	0	0	0	0	1
0	0	0	1	1	0	3	0	0	0	1	0
0	0	0	0	0	137	0	0	0	0	0	0
0	0	0	-11	8	0	0	0	0	0	0	0
0	0	0	0	1	0	0	0	0	0	2	1
0	0	-4	1	1	2	0	0	0	2	0	0
0	3	0	-5	0	-14	1	1	8	0	1	1
0	0	0	1	0	0	137	0	0	0	1	0
0	0	0	6	0	1	0	0	1	0	0	0
0	0	0	2	0	1	2	0	0	2	0	1
1	0	0	0	3	1	0	2	0	0	2	0
0	0	0	2	0	0	0	1	-109	0	0	0
0	0	0	0	0	1	1	0	-122	0	0	1
1	0	0	0	0	3	1	0	-5	0	0	2
0	0	0	0	0	1	1	0	1	0	0	0
0	0	1	0	0	0	0	2	1	0	1	1
1	0	0	0	0	0	1	0	1	0	0	0
0	0	-11	0	0	0	0	0	0	0	0	1
0	0	0	0	0	0	1	1	0	0	0	0
2	0	1	0	0	0	1	1	1	0	0	0
0	0	-5	0	1	8	3	3	1	0	0	0
0	0	1	2	0	0	1	1	0	1	0	2
0	0	6	1	0	1	0	0	0	0	3	0
0	0	2	0	0	0	0	0	0	0	0	0
0	1	0	0	1	1	0	1	0	0	0	0
0	0	2	0	1	1	0	0	0	1	0	1
0	-11	0	0	0	0	0	1	1	0	1	0
0	1	0	1	0	0	0	1	0	1	1	1
0	-5	0	0	1	0	0	3	0	1	0	0
0	1	0	0	0	0	8	1	0	0	0	0
0	6	0	0	0	0	1	0	0	-151	0	0
0	2	0	-11	0	0	0	0	0	0	0	0
0	2	0	0	0	3	0	0	0	1	2	0
0	0	0	1	0	0	0	0	0	0	0	0
0	0	0	0	0	0	1	0	-13	0	0	2
1	0	1	6	0	0	0	0	0	0	0	3
2	0	0	0	0	0	0	0	0	0	0	0
0	0	0	0	-151	0	1	3	0	-26	-11	0
0	0	0	0	5	0	1	0	1	0	0	0
0	1	1	0	-42	0	0	8	0	0	0	0
0	0	0	0	-13	0	0	1	154	1	0	1
0	0	0	1	-26	0	0	0	4	0	0	1
0	0	0	0	-32	0	0	0	1	0	0	0
1	0	-11	0	-110	0	0	0	1	0	0	0
7	0	0	0	-28	4	0	1	1	0	0	0
0	-11	1	2	-47	0	0	0	0	0	0	0
0	0	0	0	30	0	3	0	0	0	0	2
1	1	6	0	-31	0	0	1	0	0	0	0
0	6	0	1	131	2	0	1	0	0	0	0
0	0	0	0	9	0	0	0	0	0	1	0
0	0	0	0	50	0	0	0	0	0	0	0
0	0	0	0	0	-9	0	0	0	2	0	0
0	0	0	0	-65	0	0	0	0	0	0	0
0	0	1	1	-130	0	0	0	1	8	0	-11
0	1	0	0	-19	1	0	0	1	0	0	0
0	0	0	0	5	0	0	0	0	0	1	0
3	0	0	0	0	0	0	3	0	0	0	0
0	2	2	0	1	1	0	0	0	1	0	0
0	0	0	0	1	0	2	0	0	0	0	0
0	0	0	1	7	1	0	0	0	0	0	0
0	1	1	0	90	0	0	0	0	3	0	0
0	0	1	1	2	1	4	0	0	0	1	0
0	0	0	0	0	0	0	0	0	2	0	0
0	0	0	0	0	0	0	0	0	0	1	0
0	0	0	0	0	0	0	0	0	0	2	0
0	1	0	0	1	0	1	0	0	0	1	0
0	0	1	0	0	1	0	0	0	1	0	1
0	0	0	0	0	1	2	1	-1	0	0	0
0	0	0	1	0	0	0	0	59	0	0	0
0	1	0	0	4	0	0	2	-96	0	0	0
0	0	0	0	1	0	-9	0	73	0	0	0
0	1	1	0	0	0	0	0	-86	0	0	0
1	0	0	1	0	0	0	4	2	1	0	1
0	0	1	0	0	0	0	0	1	0	1	0
-11	0	0	0	0	0	0	0	0	0	0	0
1	0	0	0	2	0	1	0	0	0	0	0
2	1	0	0	1	0	0	1	0	3	0	0
0	0	0	0	0	0	0	0	0	0	0	0
0	1	1	1	-10	0	0	2	1	0	0	1
0	0	0	-5	0	0	0	0	0	1	0	0
0	0	1	0	1	0	1	0	0	1	0	1
-11	0	0	0	0	0	0	-9	0	-13	0	2
0	0	0	0	0	-32	1	0	0	0	0	1
1	0	0	1	-5	-110	0	0	0	0	0	0
0	1	0	0	0	-65	0	0	1	0	0	0
0	-5	0	0	0	21	1	0	0	0	1	0
1	0	1	2	0	1	0	1	1	0	0	0
0	0	-5	0	0	0	0	0	0	0	1	0
0	0	0	0	0	0	0	0	1	1	2	0
0	1	0	0	0	2	0	0	0	0	0	1
0	0	0	0	0	0	0	0	0	0	0	0
1	0	1	4	2	1	1	1	61	1	0	0
0	2	0	2	2	0	0	0	-95	1	8	0
0	0	0	0	0	0	1	1	17	0	0	0
0	0	2	0	1	0	0	1	-17	1	0	0
0	0	0	0	0	2	0	0	1	0	0	0
0	0	0	1	0	0	-11	0	2	0	1	0
0	4	0	0	1	1	0	1	1	0	0	0
0	2	0	1	0	0	0	0	0	1	-9	0
1	0	4	1	0	0	0	0	0	0	0	0
0	0	2	1	0	0	1	0	0	0	2	1
0	0	0	0	0	2	1	0	-24	-28	3	0
0	0	0	1	1	0	0	0	0	-98	0	1
0	1	0	0	0	-5	0	1	2	0	0	0
0	1	1	0	0	0	0	0	0	0	2	0
0	1	0	1	3	0	0	1	0	0	0	1
0	0	1	0	0	0	1	0	0	0	0	2
1	1	1	1	1	1	0	0	0	0	0	0
-5	0	1	0	0	0	0	0	0	1	0	0
0	0	0	0	0	1	2	-11	0	0	0	0
0	1	1	0	0	0	0	0	0	0	1	8
0	0	0	-11	0	0	0	0	0	0	0	0
1	1	0	0	0	0	0	0	0	1	0	0
0	0	1	1	0	0	0	1	1	1	0	0
0	-11	0	0	0	0	-32	1	0	0	0	0
0	0	1	0	2	0	0	0	1	0	0	1
0	1	0	0	0	0	0	0	0	0	0	2
0	0	0	0	0	0	2	0	0	0	0	0
0	0	-11	1	0	0	0	0	0	0	3	-9
0	0	0	0	0	0	0	1	0	0	0	0
1	0	1	0	0	2	0	0	0	0	0	2
1	1	0	1	1	1	0	0	0	0	1	3
1	0	0	0	0	2	0	2	0	0	1	0
0	0	0	0	0	2	2	0	14	1	0	0
1	0	0	1	0	0	0	0	152	0	1	2
0	0	1	0	2	1	0	0	1	1	-13	0
1	1	0	1	0	0	1	0	1	0	0	0
0	0	0	0	0	0	-5	0	0	0	0	0
-11	1	1	0	-10	1	0	0	0	0	0	0
1	0	0	1	-55	0	0	0	0	0	0	0
0	0	0	0	-167	0	0	0	0	0	0	0
0	1	1	0	-23	0	0	0	0	0	0	0
0	0	0	1	71	0	2	2	-20	0	0	0
0	0	1	0	43	1	1	0	0	0	0	0
0	1	0	1	23	1	0	0	0	0	1	0
0	0	0	0	16	4	1	1	0	-38	0	0
0	1	1	0	67	0	0	-5	0	0	0	0
1	0	0	0	11	0	0	0	1	0	0	0
0	0	0	0	-18	0	0	0	0	1	1	3
1	0	1	0	88	3	0	0	0	4	1	0
0	0	0	0	63	0	0	0	0	0	0	0
1	0	1	0	31	0	0	2	0	0	1	1
0	0	0	0	79	0	0	1	0	0	0	1
0	0	0	0	-100	0	0	0	0	1	0	0
1	0	0	0	61	1	0	1	1	1	0	1
0	3	0	0	-5	0	0	0	0	0	0	-13
0	1	0	-7	2	0	0	0	0	0	1	0
0	0	0	0	55	0	0	0	0	0	0	0
0	0	0	0	1	0	0	0	0	0	0	0
0	0	0	3	2	0	0	0	0	0	0	0
1	1	0	1	1	0	0	0	1	0	0	0
0	0	0	0	2	0	0	0	1	0	0	0
0	2	0	0	1	0	2	0	0	0	0	0
0	1	3	0	0	0	1	0	0	0	1	0
1	0	1	1	1	1	0	0	0	1	0	1
0	2	0	0	1	0	2	0	0	0	0	0
2	1	0	2	2	0	2	0	1	0	0	0
1	0	0	1	0	2	0	0	0	1	0	0
0	1	1	0	1	-5	0	0	-26	0	0	1
0	0	0	0	0	0	1	0	-8	1	1	1
3	0	2	0	0	0	0	0	-14	0	1	0
0	0	1	2	0	0	0	2	165	0	1	1
0	3	0	1	0	0	1	1	-14	1	0	0
0	0	0	0	0	0	0	0	-3	1	0	0
0	0	2	0	3	0	0	2	-8	0	0	0
0	0	1	1	-24	0	0	2	-22	0	0	0
1	0	0	0	0	-5	0	0	1	0	0	1
0	0	0	0	0	1	0	0	91	0	0	1
0	0	1	0	0	0	1	1	0	0	1	0
1	0	0	3	0	0	1	0	0	0	0	0
0	1	0	0	0	0	0	0	0	17	0	0
1	1	0	0	0	1	1	3	0	0	0	0
0	0	3	0	0	0	4	1	3	1	1	0
0	0	0	0	0	2	1	0	0	0	0	0
0	0	0	0	0	0	0	0	0	2	0	1
0	0	0	0	2	2	0	0	0	0	0	6
1	1	0	0	0	0	0	0	0	0	0	0
-9	1	0	0	0	0	3	0	0	0	1	0
0	0	0	0	0	1	0	0	0	0	0	0
0	0	0	1	0	-85	0	1	0	0	1	0
0	1	0	1	0	-23	0	2	0	0	0	0
0	0	0	1	0	12	0	1	0	0	0	1
0	0	1	0	0	-2	0	0	0	0	1	1
0	0	1	0	0	-5	1	1	0	0	0	1
0	1	1	0	5	2	0	4	0	1	0	0
1	0	0	0	1	1	0	1	0	0	0	0
1	0	0	2	2	1	0	0	0	1	0	0
0	1	0	0	0	2	0	0	0	2	0	0
0	0	0	1	1	0	0	0	0	0	0	0
0	0	2	1	1	0	0	0	0	0	0	0
-13	0	0	0	0	0	0	3	1	0	0	1
0	0	1	0	0	0	0	0	2	1	0	0
0	-9	1	1	0	0	0	0	4	0	0	0
0	1	0	0	0	3	0	0	0	1	0	0
1	0	0	0	0	0	0	0	0	0	1	1
0	0	1	0	0	0	2	0	0	0	0	0
0	0	0	0	0	0	1	1	1	1	0	0
0	1	0	1	0	0	5	0	0	0	0	0
0	0	0	0	0	0	0	0	-7	-13	0	0
1	0	1	0	0	0	0	0	-35	0	0	1
0	0	0	1	0	0	2	0	-111	0	0	0
0	0	0	0	0	0	-5	0	9	0	0	1
1	0	1	2	1	0	0	0	1	0	0	0
0	0	0	0	0	1	0	0	3	0	0	0
0	1	2	0	2	2	0	0	0	1	0	1
2	1	0	0	1	0	0	0	2	0	1	0
0	0	0	0	0	0	0	0	0	0	0	0
0	0	0	0	1	0	0	0	0	0	0	0
0	0	0	0	1	1	0	0	1	0	1	0
0	0	0	0	0	0	0	2	0	152	0	0
0	0	0	0	1	0	-5	1	1	0	1	0
1	0	-9	-9	1	0	1	5	4	0	0	0
0	-13	1	1	0	0	1	0	0	0	1	0
0	0	0	0	0	0	0	0	1	0	0	0
0	0	0	0	0	0	0	2	1	-20	0	0
0	0	0	0	0	0	0	-5	0	0	0	0
0	1	1	1	0	0	0	0	0	0	0	1
0	0	0	0	1	1	1	0	0	0	1	0
0	0	0	0	0	5	0	0	1	0	1	0
0	0	0	0	0	1	2	0	0	0	4	0
0	0	0	0	0	0	0	0	3	0	0	0
0	0	0	0	0	2	0	0	0	1	1	0
-4	1	0	0	1	0	2	0	0	0	1	0
2	0	1	1	0	1	0	6	0	0	1	0
0	0	1	1	-8	1	0	0	0	0	0	0
0	1	0	0	-4	0	0	0	0	0	0	0
0	0	0	0	-7	0	0	-5	0	0	0	0
2	1	0	0	-6	0	0	1	1	0	0	0
0	0	0	0	41	1	1	1	111	0	0	1
1	0	0	0	-95	0	2	0	2	0	0	1
1	0	0	0	26	0	0	0	45	0	0	0
0	0	-13	-13	-66	1	1	0	2	1	0	0
0	0	0	0	-150	0	0	0	1	0	1	0
0	0	0	0	-75	0	0	0	2	0	0	1
4	2	0	0	21	0	0	1	0	0	1	0
0	0	0	0	74	0	0	0	0	0	0	1
0	1	1	0	-25	0	0	2	0	0	1	0
0	0	0	0	25	0	0	0	0	1	2	1
0	0	0	0	-9	0	0	0	0	0	0	0
0	0	0	1	1	1	0	2	0	1	0	0
1	0	0	0	0	0	0	0	0	0	0	0
0	0	0	0	0	0	0	0	1	0	0	0
0	1	1	0	0	-8	1	0	0	1	0	0
1	0	0	0	0	0	2	0	0	1	0	1
1	0	0	0	2	0	0	0	0	0	0	1
0	0	1	1	0	1	0	0	2	0	1	4
0	0	0	0	0	2	2	1	0	1	0	0
1	0	1	0	1	0	0	0	2	0	1	1
0	0	0	1	0	0	1	0	0	0	2	1
1	0	0	0	0	0	0	0	0	6	0	1
0	0	0	1	0	0	0	0	0	1	0	0
0	1	0	0	0	2	1	0	0	1	0	0
0	0	0	0	0	1	0	0	0	0	1	0
0	0	0	0	0	0	0	0	0	0	0	0
0	0	0	0	0	0	0	0	0	0	1	0
0	0	2	0	0	1	0	1	0	0	0	0
0	0	0	0	1	0	0	2	0	0	0	0
0	0	1	0	0	1	0	0	-80	0	1	0
0	0	0	2	0	-13	0	0	-4	0	0	0
0	0	0	0	0	0	0	2	73	0	0	1
0	1	0	1	0	0	0	0	1	0	0	0
0	-4	0	0	0	1	1	1	-63	0	-13	0
0	2	0	0	0	1	5	0	1	0	0	0
0	0	1	0	0	0	1	0	0	0	0	0
0	0	0	0	1	0	0	1	0	0	0	0
0	0	0	0	0	0	2	0	0	3	0	0
-8	2	0	1	0	1	0	0	0	0	0	0
0	0	0	0	0	0	1	0	2	2	0	0
0	1	0	0	0	-15	1	0	0	0	1	0
0	2	0	0	0	0	0	0	0	0	1	0
0	1	0	0	0	0	2	0	3	0	0	1
0	0	0	0	0	0	0	0	1	0	0	0
0	0	0	0	0	0	0	0	1	1	0	1
0	0	1	0	0	0	1	0	0	0	0	2
0	0	0	0	1	0	0	0	2	0	0	0
0	0	0	0	0	0	0	1	0	0	0	0
0	4	0	1	2	0	1	0	0	2	0	0
2	0	0	0	0	1	1	1	0	0	1	1
0	0	0	0	0	0	0	5	0	0	0	0
0	-12	0	0	0	0	0	1	0	0	0	1
0	1	0	0	0	0	0	0	0	4	1	0
1	0	0	0	0	-5	0	1	0	0	0	0
0	0	0	0	1	3	0	2	0	0	0	0
0	0	0	0	1	0	0	0	0	0	0	1
0	0	1	0	1	0	0	1	0	0	0	0
0	0	-4	0	1	0	1	1	46	1	0	1
0	0	2	0	0	1	0	0	-17	0	0	0
0	0	0	0	0	0	0	2	1	9	0	0
0	0	0	1	0	0	-8	0	0	2	0	0
0	1	0	-4	0	28	0	0	0	0	0	-13
0	1	2	2	0	37	0	1	0	0	0	0
0	1	0	0	0	-54	1	0	0	2	1	0
0	0	1	0	0	-12	2	0	1	0	1	0
0	0	2	0	0	2	0	1	0	1	4	0
0	1	1	2	0	0	0	1	2	0	-11	0
0	1	0	0	0	2	0	0	2	4	0	1
3	0	0	1	0	1	0	0	-4	1	0	0
0	0	0	2	0	1	0	0	0	1	0	1
0	0	0	1	0	0	2	0	2	0	0	2
1	1	0	0	0	0	1	0	0	1	0	1
0	-4	0	0	1	0	0	0	0	0	0	0
1	1	4	0	0	0	0	0	0	0	1	0
0	0	0	0	2	0	0	1	0	-6	0	0
0	0	0	0	0	1	1	0	0	0	1	0
0	0	-12	0	-84	0	0	0	0	4	0	0
0	0	1	4	-31	0	1	-8	1	0	0	0
0	0	1	0	6	0	0	0	0	1	0	0
2	0	0	0	47	0	0	0	0	0	0	1
0	0	0	0	-18	0	3	1	0	0	0	0
0	1	0	-12	-128	0	-13	2	47	1	0	0
-13	0	0	1	5	0	0	0	-6	0	1	1
1	1	0	0	-8	0	0	0	0	0	1	0
0	0	1	1	73	0	1	0	4	3	0	0
0	0	2	0	-32	0	1	0	2	0	0	0
1	0	0	0	-6	2	0	0	1	0	0	0
0	0	0	0	88	0	0	0	1	0	0	0
0	0	0	0	-28	0	0	2	0	0	1	0
-12	1	0	0	-27	0	1	1	-16	0	0	0
1	0	1	1	1	0	0	0	0	0	0	0
0	0	0	2	1	1	-15	0	0	0	0	0
-4	1	1	0	1	0	0	0	0	1	0	0
0	0	1	0	1	0	2	1	0	0	1	1
0	-8	1	0	6	1	0	0	0	-4	0	1
0	0	0	1	1	0	0	1	0	-6	0	4
0	0	0	0	2	2	0	0	0	22	0	-11
0	0	1	0	0	0	0	0	0	33	0	0
0	0	1	1	0	0	0	3	0	2	0	0
0	0	0	0	0	0	0	-13	0	0	0	0
0	0	0	1	0	0	0	0	0	0	0	0
0	0	0	1	0	1	0	0	1	0	0	0
0	1	1	1	0	1	1	1	0	0	3	0
0	0	-4	0	-6	0	0	0	0	0	0	0
0	0	1	0	0	0	0	1	0	0	2	1
0	0	0	1	0	1	0	0	0	0	0	0
0	2	0	1	0	1	0	0	0	0	0	0
0	0	0	0	0	0	-5	0	1	0	0	0
1	0	0	0	0	1	3	0	-13	0	0	0
0	1	0	0	1	6	0	1	0	1	2	0
0	1	0	1	1	0	1	0	-7	0	0	0
0	0	0	-4	0	1	0	-15	0	0	0	1
0	0	0	1	0	1	0	1	0	0	1	1
1	0	1	0	0	1	0	0	0	2	0	0
0	0	0	0	0	0	0	2	0	-9	0	0
2	0	1	0	0	0	1	0	0	0	0	0
0	0	0	0	-26	0	0	0	4	0	0	0
-12	0	0	0	1	0	0	0	10	2	2	1
0	0	0	0	0	0	0	0	2	0	0	0
0	1	0	0	0	0	-54	0	3	0	0	0
0	0	0	0	0	0	2	0	1	0	0	0
0	0	1	0	0	0	1	0	0	0	0	0
3	0	0	1	0	0	0	0	0	0	0	1
1	0	0	0	0	0	0	1	0	0	4	0
0	0	0	1	0	3	0	0	2	0	0	0
1	0	1	0	0	0	1	0	0	0	0	0
0	0	0	0	0	0	0	0	0	0	0	0
3	2	0	0	1	0	0	0	-26	0	0	0
1	1	0	0	0	0	0	-5	1	0	1	0
0	0	-8	0	0	0	0	3	1	0	0	0
0	0	0	1	0	0	0	0	0	0	0	0
0	0	0	0	1	0	0	1	1	0	0	-199
0	0	0	1	0	0	0	0	0	0	1	3
0	0	0	0	0	1	0	0	0	0	0	0
0	0	0	0	1	0	0	0	0	0	1	2
0	3	0	1	0	0	0	0	0	0	0	0
0	0	0	1	0	0	0	1	1	3	1	0
2	0	0	0	0	0	1	0	0	1	2	0
0	1	1	0	0	0	2	0	0	1	0	0
0	0	0	0	0	0	0	0	2	1	0	2
0	1	0	0	1	2	0	0	0	0	1	0
1	0	0	-8	1	0	0	2	0	0	0	0
1	0	0	0	1	0	-6	0	0	1	0	1
1	0	2	0	-5	0	0	2	0	0	4	0
0	1	0	0	3	0	1	0	1	0	2	0
0	0	0	0	0	0	0	1	-7	2	0	0
0	0	1	0	1	1	0	1	151	0	-6	0
1	0	1	0	1	0	0	0	13	0	0	2
1	0	0	0	0	0	1	0	-45	0	4	0
0	0	0	0	0	0	0	0	-9	0	0	0
0	2	0	1	0	2	2	0	3	0	1	0
0	0	0	0	0	0	0	0	2	0	0	0
0	0	0	0	3	0	0	0	1	0	0	4
3	-13	0	0	1	5	2	0	1	0	0	0
0	1	0	0	0	-7	0	0	0	0	2	0
0	0	0	2	0	0	0	0	0	2	0	4
1	0	0	0	0	0	0	0	1	0	0	0
-13	0	0	0	0	0	0	0	0	0	0	0
0	1	1	0	0	0	1	1	0	0	0	0
0	0	0	0	0	0	0	2	0	0	1	0
0	3	0	1	0	0	1	0	0	0	0	1
0	0	0	1	0	-6	1	0	3	0	0	0
0	0	0	0	0	0	0	0	0	0	0	0
0	-12	0	0	2	0	0	-6	1	0	3	0
0	0	0	0	1	0	0	0	0	5	0	1
0	-4	0	0	0	0	0	1	0	0	0	1
0	0	0	0	0	0	1	0	1	0	0	0
0	0	2	0	0	0	1	0	-4	0	0	1
0	0	0	0	0	0	1	0	0	0	0	2
0	0	1	0	-18	0	0	1	0	0	0	0
0	1	0	0	-18	0	1	0	0	0	0	0
0	0	0	0	-49	0	1	2	1	1	0	1
0	0	0	0	135	0	6	0	0	0	4	0
0	0	0	0	5	0	0	0	0	2	1	0
0	-4	0	0	-51	1	0	2	0	2	0	4
0	0	0	1	4	1	1	0	0	-4	-4	2
1	0	0	0	-102	3	1	0	0	0	-18	0
0	0	3	0	8	0	1	1	1	2	1	-6
1	0	0	0	-11	0	0	0	-23	0	2	0
0	0	0	0	11	0	0	0	2	0	0	4
1	0	0	0	-45	0	0	1	21	0	0	0
2	0	1	0	-7	0	0	0	-143	0	0	1
1	0	0	0	15	0	0	0	0	0	0	0
1	0	1	0	-13	0	0	1	0	0	0	0
0	0	1	0	1	0	0	1	1	0	0	0
1	0	0	2	2	1	0	0	0	1	-6	2
1	0	0	0	1	0	0	0	3	1	1	0
0	0	0	0	2	0	0	0	0	0	0	0
0	0	1	1	2	0	0	0	1	0	0	0
1	1	1	0	2	1	0	1	0	0	0	0
2	0	0	0	1	0	3	1	0	0	0	1
0	0	0	0	2	0	0	1	0	0	0	0
0	0	0	0	0	1	0	0	-18	1	2	0
0	0	0	0	0	0	0	1	10	0	0	0
0	0	0	0	1	0	0	1	0	0	-9	3
1	0	2	0	0	0	0	6	0	0	0	0
1	0	0	3	0	0	0	0	0	1	0	0
0	1	0	0	0	0	0	0	0	0	0	0
0	0	-13	0	0	0	0	0	1	0	0	0
0	0	1	0	0	1	0	1	0	1	2	0
12	1	0	1	0	1	0	1	0	1	0	0
-5	2	0	0	2	0	0	1	3	3	1	0
-31	0	0	1	1	0	0	0	0	-16	0	0
-132	-12	1	1	3	0	1	0	0	0	0	0
100	0	1	1	1	1	0	0	1	0	0	4
31	-5	0	0	0	2	0	0	-28	0	0	1
-34	0	3	0	-26	-5	0	0	-158	0	0	0
-1	0	0	0	2	3	0	0	-11	0	0	-4
-92	0	0	1	0	1	0	0	27	0	0	1
-9	3	-12	1	0	3	0	0	1	0	0	0
73	1	1	0	0	0	2	0	1	0	0	0
37	-13	0	0	0	0	0	0	1	0	0	0
1	0	-4	0	0	1	0	0	0	0	0	0
-1	1	0	0	0	0	0	0	-10	1	1	0
68	0	0	0	0	1	0	3	0	0	0	-6
0	3	0	2	0	1	0	0	1	0	0	1
45	1	0	0	2	0	0	0	0	0	0	0
50	0	1	0	0	0	1	0	1	0	1	2
10	2	0	-13	0	0	0	0	1	0	1	0
83	0	0	1	0	0	0	0	0	0	0	0
39	0	0	0	0	0	0	0	1	0	0	0
15	0	0	0	0	0	2	0	0	1	1	0
-16	0	0	0	0	0	0	0	1	0	0	0
10	0	-4	0	1	3	0	0	2	0	0	2
18	0	0	1	0	1	0	0	0	1	0	0
26	0	0	1	0	0	0	0	0	-13	0	-9
16	0	0	0	-10	0	0	0	0	0	2	0
12	0	0	3	0	0	0	0	0	-7	0	0
-95	0	0	0	0	1	0	1	0	1	0	0
-60	0	0	0	1	0	0	0	0	1	0	0
128	0	0	-12	0	1	0	0	0	0	0	0
-23	2	0	1	0	-13	0	0	0	0	0	2
21	0	0	0	1	1	3	0	0	7	0	0
-17	0	0	-4	0	0	1	0	2	0	0	0
43	0	0	0	0	0	0	0	0	0	0	0
-125	1	1	0	1	2	0	2	0	0	0	1
15	1	0	0	0	0	1	0	0	0	0	0
22	1	0	0	1	0	0	0	133	0	0	0
-43	0	0	1	0	0	0	0	-180	0	2	0
-37	0	0	0	0	0	0	0	-3	0	0	0
-2	0	1	0	1	0	0	0	-10	2	0	0
30	0	0	0	0	2	0	0	-12	6	0	0
-50	0	0	0	0	0	0	1	-27	2	0	0
14	0	0	0	0	0	0	0	2	-26	-10	0
-3	1	0	-4	0	0	1	0	1	0	0	0
-14	1	0	0	0	0	0	0	0	1	0	0
15	0	0	0	0	2	3	0	0	1	0	0
-7	0	0	0	0	-10	0	2	1	1	0	0
19	0	0	0	0	1	1	0	0	0	0	1
3	0	1	0	0	0	0	0	1	1	3	0
-84	3	0	0	0	0	0	0	1	2	1	0
29	0	0	0	0	0	0	0	0	0	0	1
-90	0	2	0	0	0	0	0	0	0	5	1
-32	2	1	0	0	0	0	0	0	0	0	1
-37	0	2	0	0	0	1	0	0	0	0	0
1	1	0	0	0	-90	-6	0	0	0	0	0
-172	-13	-12	1	2	1	0	1	1	0	0	0
-11	0	0	0	1	2	1	0	1	1	0	1
2	0	0	0	0	-10	1	0	0	0	0	0
-7	0	0	0	14	2	0	0	0	0	2	0
0	0	-5	0	111	1	1	0	0	0	2	0
1	0	0	1	-116	0	0	0	0	0	-4	0
1	0	0	0	-27	0	0	0	0	2	0	2
0	0	0	0	-61	0	0	0	-6	0	2	0
2	2	0	0	-45	0	0	1	-1	0	0	0
1	0	3	0	38	0	0	0	1	0	0	0
0	0	1	0	-2	2	1	3	3	0	0	0
0	0	-13	0	-1	0	2	0	1	0	0	0
0	0	0	0	-43	0	-5	0	0	0	0	0
0	1	1	0	-31	1	0	1	0	1	0	0
0	0	0	0	-82	1	0	0	0	0	0	0
1	0	3	1	2	0	3	0	0	0	0	0
0	0	1	0	-3	3	0	0	0	-9	0	0
0	0	0	0	1	2	1	1	1	1	1	0
0	0	2	2	2	0	3	0	0	0	1	0
-25	0	0	1	2	2	0	0	0	1	0	2
0	0	0	2	4	0	0	1	0	0	0	0
0	0	0	0	1	0	0	0	0	0	0	0
0	0	0	-12	1	0	0	-6	1	1	0	0
0	0	0	0	0	0	1	0	0	1	0	0
0	0	0	0	0	0	0	1	0	1	0	-10
-41	1	0	0	1	1	1	1	1	0	0	0
0	1	0	-5	0	0	0	0	0	2	0	0
2	0	0	0	1	0	1	1	0	0	1	0
1	1	0	0	0	0	0	0	0	0	0	0
0	1	0	0	0	0	0	0	2	0	1	0
0	0	0	0	1	0	0	0	1	1	1	3
0	1	0	3	0	1	0	0	0	-4	0	1
2	2	2	1	3	2	0	0	0	0	0	0
0	1	0	-13	2	1	0	0	0	0	0	5
0	1	0	0	0	0	0	1	0	0	1	0
0	0	0	1	0	1	0	2	2	0	0	0
0	0	1	0	0	0	0	-5	-15	0	0	0
2	1	1	3	2	-10	0	0	-45	0	0	0
0	1	3	1	0	0	3	0	32	0	3	0
0	0	1	0	0	0	1	3	22	1	0	0
0	0	0	2	2	0	0	0	-8	0	0	2
0	0	0	0	1	0	0	1	0	0	0	2
0	1	0	0	1	0	0	3	0	0	0	0
1	2	0	0	0	1	1	0	1	0	1	0
1	0	0	0	1	0	1	0	0	0	0	0
0	0	0	0	0	0	0	0	3	3	-8	2
0	0	0	0	0	0	0	0	0	0	0	-9
0	0	1	0	1	3	1	1	0	0	0	0
0	0	1	0	0	1	0	0	0	1	0	0
0	0	0	0	0	0	-13	1	0	0	0	0
2	0	0	0	0	0	0	0	0	0	0	0
0	0	0	0	1	0	1	1	0	0	0	0
0	1	0	0	0	1	1	0	1	141	1	0
0	1	0	0	0	0	1	0	1	1	0	0
1	0	3	2	3	-13	0	0	0	0	-5	0
0	0	0	0	0	0	0	0	0	1	0	0
0	0	0	0	1	0	0	0	0	0	0	0
1	0	2	0	0	0	2	0	0	0	1	0
0	0	0	1	0	1	0	0	0	-18	-13	1
0	2	1	1	0	1	0	0	0	0	0	1
0	0	-13	0	0	0	0	0	1	0	-4	0
0	100	0	0	0	0	0	0	1	10	1	0
0	-76	0	3	0	0	0	0	0	0	1	0
0	-54	0	1	0	0	0	0	0	0	0	0
0	58	0	0	0	1	0	3	1	0	0	0
0	-39	0	0	0	0	0	1	18	0	0	0
0	-9	0	0	2	0	0	0	-134	0	0	0
0	-17	0	0	1	0	0	0	3	0	0	0
1	43	2	0	0	0	2	0	0	0	0	1
1	-101	1	0	1	1	0	1	2	0	0	0
0	1	0	0	0	3	0	1	0	3	0	1
0	-11	0	1	0	0	0	0	0	0	1	1
0	0	0	1	1	0	-4	0	0	0	0	0
1	0	0	0	0	0	0	1	0	0	0	0
0	2	1	0	0	0	0	0	0	0	0	1
0	1	0	0	1	0	2	0	1	1	0	0
0	0	0	0	0	0	-10	-13	0	0	0	0
0	0	0	0	0	0	1	0	0	1	0	0
0	0	0	3	1	0	0	1	0	0	1	1
0	0	0	0	0	0	0	1	0	0	0	0
0	-25	0	0	0	0	0	1	0	0	2	0
0	0	0	2	0	0	0	3	0	3	0	0
3	0	0	0	3	0	0	0	2	0	0	0
-8	0	0	1	0	0	0	0	0	0	1	0
0	-41	0	-13	0	0	0	0	0	1	1	0
0	0	0	0	0	0	-10	2	0	-100	1	1
0	0	1	0	0	0	0	0	1	0	0	3
0	0	1	0	0	0	2	0	0	0	1	0
0	2	0	0	0	1	0	0	2	1	1	0
0	0	1	0	-81	0	0	0	1	1	2	-8
0	0	1	0	-12	2	0	0	1	0	0	0
0	0	0	0	-2	0	1	0	-23	2	2	0
0	0	1	2	-69	0	0	0	-1	0	0	0
0	0	2	1	18	2	0	0	7	0	0	0
0	0	1	0	-27	1	0	0	76	0	0	0
1	1	1	0	2	1	0	0	-32	0	0	0
0	0	0	0	1	0	0	2	-11	2	6	1
1	0	0	0	1	0	1	0	1	0	0	0
0	0	1	0	-4	10	1	0	1	0	1	-5
0	0	1	1	1	-45	0	0	-1	0	0	0
0	0	0	0	2	-5	0	-4	1	0	0	0
1	0	0	0	0	1	0	0	1	0	0	1
2	0	0	0	2	0	0	0	0	-5	0	-13
1	0	1	0	1	2	0	1	0	0	0	0
0	0	2	0	1	0	0	2	0	1	0	-4
2	0	0	0	1	0	1	-10	2	1	2	1
0	0	0	0	4	0	2	1	0	0	0	1
0	0	0	0	1	2	0	0	0	0	0	0
1	1	0	0	1	0	1	0	0	0	0	0
1	1	0	0	2	0	0	0	0	0	0	0
0	0	0	0	1	0	1	0	0	0	0	0
0	0	0	0	1	1	0	0	0	0	0	0
0	0	0	0	0	0	-10	0	0	1	0	0
0	0	0	1	0	0	0	0	0	0	1	0
0	1	0	1	0	1	0	0	0	0	0	0
0	1	1	1	0	1	0	1	0	0	0	0
0	0	1	0	-10	0	0	0	0	2	1	0
0	0	0	1	0	0	0	0	0	0	-13	0
0	0	0	1	0	0	0	0	1	0	1	1
0	0	0	0	0	1	0	1	0	1	1	0
0	0	0	1	0	2	0	1	0	2	3	0
0	0	0	2	1	0	1	0	-37	1	0	0
0	1	2	1	1	0	1	0	7	0	2	0
0	0	0	1	1	0	0	0	-92	3	-13	0
0	0	-91	0	0	1	0	0	-55	129	0	0
0	0	0	0	1	0	0	0	23	1	1	1
3	0	0	1	0	1	1	0	-61	0	0	0
0	1	0	1	0	0	3	0	1	-22	1	0
1	2	0	0	1	0	1	1	1	1	0	0
0	2	0	0	0	-8	0	2	3	1	0	1
0	0	0	0	1	1	0	0	0	0	0	1
0	0	0	1	0	0	0	1	0	0	1	1
0	0	-41	2	1	0	1	0	0	0	1	0
0	-10	0	0	0	1	0	1	1	1	-4	1
0	0	0	0	0	0	0	0	0	0	0	1
0	0	0	0	0	0	1	-10	0	0	0	2
1	0	0	0	0	0	0	0	0	0	0	0
0	0	0	0	0	0	3	0	0	1	0	2
0	1	0	0	0	0	-13	0	0	0	0	0
0	0	0	0	1	0	2	0	-10	1	0	0
0	0	0	0	0	1	0	0	1	0	0	0
1	0	0	0	0	0	0	0	1	1	1	0
0	0	0	0	0	0	0	0	0	-11	0	6
1	0	0	1	0	0	0	0	0	1	0	0
0	1	0	1	1	0	1	1	0	0	0	1
0	0	0	0	0	1	1	1	1	1	1	0
1	1	0	0	0	0	0	0	1	1	0	0
0	0	0	0	0	0	0	0	0	0	0	0
0	0	1	0	0	3	0	2	0	0	0	0
0	0	0	0	0	0	0	0	0	0	0	0
0	0	0	2	2	3	0	0	0	0	0	0
0	0	1	0	0	0	0	0	0	0	0	2
0	0	0	0	1	1	1	0	0	0	1	0
0	0	0	0	0	0	0	0	0	2	1	1
0	0	0	0	0	0	0	1	1	0	3	0
0	0	0	0	0	3	0	3	32	0	0	0
1	0	1	0	2	0	0	1	-33	0	0	2
0	2	0	-41	0	0	1	0	-4	0	1	0
0	0	0	0	0	0	2	0	-110	1	2	0
0	1	0	0	0	0	3	0	24	0	0	0
0	0	0	0	0	0	0	1	1	0	0	0
1	1	1	0	0	0	0	0	-11	0	0	0
0	0	2	0	0	0	0	0	4	0	0	1
0	0	2	0	0	1	0	1	0	1	0	0
2	0	0	0	2	2	0	0	0	0	0	0
0	0	0	1	1	1	0	3	0	0	-18	1
-4	1	0	0	0	0	0	-13	0	0	0	-13
0	0	0	0	3	0	0	1	0	0	0	1
0	0	0	1	1	1	0	2	2	0	10	1
-1	1	0	0	0	0	0	0	-10	1	-9	3
0	0	0	0	0	1	0	0	0	1	0	0
0	0	0	1	0	0	3	0	1	0	0	2
0	1	1	0	1	0	0	0	2	0	0	-13
0	0	0	0	0	0	0	1	0	0	0	0
0	2	0	1	0	1	0	1	0	0	0	1
0	0	0	2	0	0	0	0	0	0	1	0
0	0	0	0	0	0	0	0	0	0	0	1
0	-4	0	-89	-171	0	0	0	1	2	0	0
0	0	0	0	-12	0	0	0	0	2	0	0
1	0	0	0	57	1	0	0	0	1	0	3
0	0	0	0	-17	0	0	0	1	0	0	0
0	0	2	0	106	2	0	1	1	0	0	0
0	-1	0	0	1	0	1	0	1	1	0	1
2	0	1	1	15	0	0	0	0	0	0	1
1	0	0	0	33	3	2	0	50	0	3	-4
0	0	1	0	68	0	0	0	95	0	0	0
0	0	0	0	-25	0	0	0	89	0	0	0
0	0	0	0	4	0	2	1	1	0	0	0
0	0	0	0	-2	0	1	2	0	1	0	0
0	0	0	0	2	0	1	0	1	0	1	0
0	0	1	0	1	0	0	3	0	0	0	0
0	0	0	0	4	1	0	0	0	0	1	0
0	0	0	0	0	2	0	0	2	2	0	1
0	0	1	2	0	0	1	0	0	0	0	0
3	0	0	0	0	0	2	0	0	0	0	0
0	0	0	1	0	0	0	0	0	0	0	0
0	0	0	0	0	0	1	0	1	0	0	1
0	0	1	1	0	-11	0	0	0	1	1	0
0	1	0	0	-14	-28	0	0	0	0	0	0
0	1	2	0	1	-9	1	0	0	0	0	0
1	0	0	0	1	18	0	0	0	0	3	0
-9	0	0	0	0	1	0	0	0	0	0	0
0	0	-4	1	2	1	0	0	1	1	0	0
0	0	0	0	3	1	1	0	0	0	1	1
0	0	0	0	1	0	0	3	1	1	0	1
0	2	0	1	0	0	1	0	0	0	0	3
0	1	0	0	3	0	0	0	0	0	2	0
0	0	-1	0	0	0	1	0	-4	1	0	0
0	0	0	0	0	1	0	0	1	0	0	1
0	0	0	0	0	0	0	0	0	0	0	2
0	0	0	1	0	0	0	0	0	3	2	0
1	0	0	0	0	0	-8	0	1	0	0	0
1	0	0	2	0	0	1	0	-9	0	0	0
-6	0	0	0	0	1	0	0	-21	0	0	0
0	1	0	0	1	1	0	0	-22	0	0	0
0	0	0	-4	0	1	1	0	12	0	0	0
0	0	0	0	0	0	0	1	-81	0	-5	10
0	0	2	0	0	2	0	0	2	0	0	-9
0	0	0	0	0	1	0	2	1	0	-7	0
2	0	1	0	0	0	1	0	0	0	1	0
0	3	0	-1	0	0	0	0	0	1	1	0
0	0	0	0	0	0	0	2	1	1	0	0
0	0	0	0	2	0	1	1	0	0	0	0
0	0	0	0	1	0	0	1	0	0	0	0
0	1	0	0	1	0	1	0	-12	0	1	1
2	0	0	0	0	0	0	0	3	0	0	0
0	0	0	0	3	1	0	0	0	0	0	0
0	0	0	0	0	1	0	0	0	1	0	0
0	0	1	0	0	0	0	179	0	0	0	0
1	0	1	0	0	0	0	0	0	-7	1	0
-6	-5	0	2	0	0	0	0	-13	0	0	0
1	1	0	0	0	0	1	1	0	0	0	0
1	0	0	0	0	0	0	0	0	0	0	0
0	0	0	1	4	0	0	0	0	0	2	3
1	-9	0	0	2	0	3	0	1	0	1	0
0	0	2	0	0	0	0	1	1	-5	0	0
0	0	1	0	1	1	0	0	0	2	0	0
0	0	0	0	-11	0	3	1	2	0	0	0
0	0	0	0	0	0	0	0	2	0	1	1
0	0	0	0	0	0	0	1	0	0	2	0
0	0	0	0	-13	2	0	0	0	2	3	1
1	0	0	1	0	1	1	1	100	1	0	0
-12	0	0	0	1	0	0	0	-160	2	1	0
-10	0	0	1	0	0	0	0	68	0	0	0
0	0	1	1	-12	-6	0	0	-57	3	0	0
4	0	0	0	0	0	0	-8	-22	0	3	0
0	0	0	0	1	0	3	1	1	0	0	-10
0	0	0	0	0	2	0	0	1	0	0	1
0	0	0	0	1	0	0	0	0	0	1	0
0	1	0	0	0	1	2	1	0	0	0	0
9	1	3	0	0	0	0	0	0	1	0	0
1	-6	0	0	1	0	0	0	0	0	0	3
0	0	0	2	1	0	0	0	0	0	0	0
0	0	0	1	1	0	0	1	1	0	1	0
0	0	1	1	1	2	0	2	0	0	1	1
1	0	0	0	0	0	0	0	0	0	0	0
0	0	0	0	0	0	0	0	2	2	0	0
0	0	0	0	4	0	0	1	0	0	1	0
0	0	0	0	1	0	1	0	0	0	0	2
0	0	0	0	0	0	2	1	0	0	1	0
1	2	0	0	6	1	1	0	0	1	0	0
0	0	0	0	0	0	0	0	0	0	-11	0
0	0	-5	1	0	0	0	0	0	1	-11	0
0	0	1	0	0	0	3	0	0	1	1	1
0	0	1	0	0	1	0	0	0	0	0	0
0	0	0	0	-43	1	0	0	0	1	1	-5
0	0	0	0	29	0	1	0	1	0	1	0
1	0	-9	0	-80	1	0	1	1	0	1	-7
0	0	0	3	-19	0	1	0	2	0	1	0
1	2	0	0	22	0	0	0	0	0	1	1
3	0	-13	0	126	0	0	3	0	1	0	0
0	0	0	0	-122	0	0	0	0	1	0	1
0	0	0	1	1	0	1	0	1	1	0	0
0	0	0	0	-65	0	1	3	-77	1	0	0
0	0	0	0	-57	2	0	0	18	0	0	0
0	1	0	0	4	1	0	0	3	1	0	1
0	-6	0	0	137	0	0	0	-32	0	0	0
0	1	0	0	1	1	0	1	1	0	0	0
0	2	0	0	1	0	1	0	1	0	2	0
0	1	0	0	-4	0	0	0	0	0	0	0
0	0	0	0	1	0	0	0	0	0	0	1
0	1	0	-5	1	3	2	0	0	0	0	0
4	0	0	1	0	1	0	3	0	0	0	0
0	0	1	1	1	0	0	0	1	0	0	0
0	0	1	0	0	0	3	0	0	0	1	2
0	2	0	0	0	3	0	2	0	0	0	1
2	1	-6	-9	0	0	0	0	1	0	0	0
0	0	0	0	0	0	0	0	1	0	0	0
0	0	0	0	0	0	0	0	0	0	1	0
0	0	0	-13	0	2	0	0	0	0	0	1
0	2	0	0	1	0	0	0	0	0	0	2
1	0	0	0	0	0	0	0	0	0	0	3
1	1	0	0	0	1	1	0	0	0	0	0
0	-12	0	0	1	0	2	0	0	0	0	1
0	0	0	0	0	0	0	0	0	0	1	-5
0	-10	0	0	0	1	0	1	0	0	1	2
0	0	2	0	0	0	0	2	0	0	0	0
0	2	0	0	0	0	1	1	0	2	0	0
0	0	0	0	0	0	0	0	1	0	0	3
2	4	0	0	0	-171	0	0	0	0	0	0
-4	0	0	0	0	-17	0	3	0	0	0	0
0	0	1	0	0	68	2	0	0	0	0	1
0	0	0	0	0	0	18	0	-48	0	2	0
1	0	0	1	0	1	1	1	-19	1	0	0
0	0	0	1	0	0	0	0	1	0	2	0
1	9	0	0	0	0	1	1	0	0	1	0
0	1	0	-6	0	0	1	0	0	0	1	1
1	0	2	0	0	0	1	0	0	0	0	1
1	0	0	0	0	0	2	0	0	0	0	1
0	0	0	0	0	-14	1	1	2	0	1	0
0	0	0	0	0	1	0	1	0	7	0	0
0	1	0	0	0	1	0	0	1	-55	0	1
0	1	0	0	0	2	0	0	1	7	0	0
1	0	1	0	0	1	0	0	0	0	0	1
0	0	-6	0	0	1	0	0	1	1	0	0
0	0	0	0	0	0	1	0	0	1	0	-11
0	0	1	2	0	0	0	0	1	0	1	-11
0	0	2	0	0	0	0	1	0	0	0	1
0	0	1	0	0	1	0	0	2	0	0	0
1	0	0	0	0	3	0	0	0	0	0	1
1	1	1	0	0	0	0	2	0	0	0	1
-4	0	0	1	0	0	0	0	2	2	0	1
-5	0	0	0	0	0	0	0	0	0	0	1
0	0	0	0	0	0	0	3	1	0	0	1
0	0	2	0	0	2	1	0	0	0	2	0
0	0	1	0	0	0	1	0	2	-10	0	0
0	0	0	0	0	1	1	0	1	-13	25	0
2	1	0	0	0	1	0	0	1	0	0	0
0	0	0	2	0	0	0	0	0	1	1	0
0	1	0	0	0	3	0	0	0	0	1	0
0	0	2	0	0	0	0	0	0	1	0	0
0	0	0	0	0	0	0	1	-12	0	0	0
0	2	1	0	1	0	0	2	0	0	1	2
0	1	-12	0	0	0	0	0	0	-10	0	0
0	3	0	1	-4	0	0	0	1	0	1	0
0	0	0	-6	0	0	0	0	0	0	0	0
0	0	-10	0	0	0	0	1	-34	0	0	0
0	0	0	0	1	0	1	0	12	1	0	0
0	0	2	1	1	0	8	0	27	1	0	0
0	0	0	2	1	0	0	0	43	0	1	0
0	0	4	1	0	4	0	0	1	0	0	1
0	0	0	0	0	2	0	2	0	0	0	0
-4	0	0	1	-12	0	0	1	0	2	0	0
-10	0	0	0	0	0	0	0	1	0	3	1
0	0	0	0	0	0	2	2	0	0	0	0
1	0	0	0	0	0	1	1	1	0	0	0
0	0	9	2	0	1	0	2	0	0	0	0
2	0	1	1	0	-11	0	1	0	0	0	0
0	0	0	0	0	1	0	0	0	0	0	0
0	0	1	0	1	0	-6	0	0	0	0	1
0	0	0	0	3	0	0	0	0	0	1	1
0	0	0	0	2	0	0	0	0	1	0	0
0	0	0	2	-15	3	2	0	0	-6	0	0
0	0	1	0	-3	-13	0	1	0	1	0	0
0	0	1	1	8	0	1	0	0	0	0	0
0	4	0	-12	-23	3	0	0	0	0	0	0
-6	1	0	0	20	1	0	0	0	0	1	0
0	0	2	0	26	0	0	0	0	0	1	0
0	0	0	-10	-8	-12	0	0	0	0	0	2
0	0	0	0	4	0	2	0	0	2	0	0
0	1	0	2	3	1	0	0	1	2	0	2
1	2	0	0	1	0	0	0	2	0	1	1
0	0	0	4	2	0	0	1	0	0	0	1
0	0	0	0	1	3	0	1	0	0	0	0
0	1	1	0	0	1	0	1	0	0	0	0
0	0	0	0	0	1	0	0	1	0	0	1
0	0	0	0	-1	0	1	0	0	0	1	0
1	1	0	0	0	0	0	0	143	0	0	0
0	1	0	0	0	0	0	0	64	1	0	0
2	0	0	9	0	1	0	0	-39	0	0	0
0	0	0	1	0	1	1	0	3	0	-5	0
0	0	1	0	0	1	1	0	1	0	2	0
0	0	0	1	1	0	0	0	0	-5	0	1
0	0	0	0	2	0	0	0	0	0	0	0
0	1	0	0	2	2	0	0	0	1	0	0
3	0	0	0	0	1	1	0	0	1	2	0
1	0	1	1	0	0	0	0	0	0	1	0
0	0	0	1	0	0	1	0	0	1	2	0
2	2	0	0	1	0	1	1	0	1	0	0
0	0	2	0	0	0	4	1	0	0	3	0
0	-4	1	2	1	0	0	8	1	0	0	2
1	1	3	0	1	0	0	0	1	3	0	0
0	0	0	0	0	0	0	0	2	0	0	1
0	0	0	0	0	1	0	0	1	0	0	1
0	0	0	0	0	2	0	0	1	50	0	0
1	1	0	0	-25	0	0	0	0	-11	0	0
0	0	0	0	0	0	0	2	0	1	0	0
0	0	0	1	1	0	2	1	0	0	1	0
0	1	0	0	56	0	1	0	0	3	0	1
0	2	0	0	0	4	0	0	0	0	0	0
1	0	0	0	0	0	1	0	0	0	0	1
0	1	0	0	6	1	0	1	0	0	0	0
0	1	0	0	0	0	0	-6	0	0	0	0
0	0	0	0	1	0	0	0	-17	0	0	0
1	0	0	1	0	0	3	0	12	0	0	0
0	0	0	0	0	6	1	2	-171	0	2	1
0	0	0	0	0	0	0	0	10	1	0	0
0	0	0	0	0	0	0	1	-139	0	0	0
1	1	0	0	12	0	3	0	1	0	0	0
0	0	0	1	0	0	0	0	0	0	0	3
0	0	0	0	0	0	0	0	1	0	0	0
0	0	1	1	2	0	0	0	0	2	1	0
0	0	0	0	0	0	0	2	0	0	0	0
1	0	4	0	0	-160	0	0	0	1	1	0
0	0	1	2	1	-43	2	0	1	0	1	0
0	1	0	1	1	126	0	0	2	1	0	0
0	0	0	0	3	-116	0	0	0	0	1	1
0	1	0	3	0	111	1	0	0	0	0	0
0	0	1	0	0	1	0	0	1	1	0	0
0	-4	2	0	1	0	0	1	1	1	0	0
2	-5	0	0	0	0	0	0	0	1	0	0
0	0	0	0	0	1	1	0	2	0	0	0
0	0	1	0	0	2	0	0	0	0	0	1
0	0	0	0	0	0	0	1	0	0	0	1
0	0	0	0	1	0	0	1	0	0	0	0
0	0	1	-10	0	3	-171	0	0	-4	0	0
0	0	1	0	1	0	-61	0	0	1	0	0
1	0	0	0	1	1	1	0	0	0	0	1
1	1	0	0	1	0	0	1	0	0	0	0
2	0	0	0	2	0	0	0	2	0	0	0
2	0	0	0	0	0	-14	0	0	1	0	0
1	2	0	0	0	1	1	1	3	1	0	0
0	0	1	0	-7	0	2	1	0	0	0	1
0	0	0	0	0	0	1	4	-21	0	0	0
0	0	0	0	1	0	1	0	1	1	0	0
0	1	0	0	0	0	1	0	1	1	0	0
0	0	2	0	0	0	0	0	1	0	0	-5
1	0	0	0	-12	0	2	0	0	0	0	2
1	0	0	0	0	0	0	0	1	0	1	0
0	0	-4	0	0	1	1	0	1	0	0	0
1	0	1	1	0	0	0	0	0	0	0	0
0	0	0	0	1	7	1	0	0	0	0	2
0	0	0	4	0	0	0	2	0	6	0	1
1	0	1	1	0	0	3	1	0	1	0	2
2	0	0	0	0	0	0	0	0	0	0	0
0	0	0	0	0	0	0	1	1	0	0	3
0	0	1	0	0	0	0	0	0	0	0	0
0	0	0	1	0	0	0	0	0	-13	0	0
0	1	0	2	0	0	0	0	0	1	2	0
0	0	0	0	0	0	0	3	0	2	-13	0
28	0	0	0	0	0	0	1	0	0	0	0
0	0	3	1	0	0	0	0	0	0	0	0
3	0	0	0	1	0	0	0	0	0	0	0
1	0	1	0	39	0	0	3	0	2	0	1
2	0	2	1	-29	0	0	0	0	0	0	0
0	8	0	1	25	0	0	0	0	0	0	0
0	0	1	0	-1	0	4	1	0	1	1	0
0	0	1	0	138	0	2	0	0	-6	0	0
0	-10	0	0	-84	2	0	0	0	3	0	0
0	0	0	0	3	0	0	0	0	1	0	0
0	1	0	0	-9	0	0	0	1	0	0	0
1	0	0	0	89	0	0	2	0	0	0	2
0	2	0	1	4	1	0	0	-110	0	0	0
0	0	0	0	1	0	0	0	-135	0	0	0
0	0	1	0	1	0	1	0	-98	2	0	0
0	0	1	0	1	0	1	1	1	0	0	0
0	0	0	2	0	0	0	0	1	2	1	0
0	0	0	0	0	0	-11	0	1	0	0	1
0	0	0	0	0	0	0	0	0	0	0	0
0	0	0	0	0	0	1	1	1	7	0	1
0	0	0	-4	0	1	1	0	0	1	0	1
-3	0	0	1	1	0	0	0	0	0	0	0
0	0	0	0	0	0	0	0	1	0	0	1
1	0	1	0	0	0	0	-61	0	1	0	0
0	0	0	1	0	0	3	0	0	4	-10	0
0	-6	1	0	0	0	-13	0	0	0	-13	0
0	0	0	0	0	0	0	-14	0	0	0	0
-7	0	0	1	2	0	3	1	0	0	0	0
1	0	-4	0	0	0	1	1	0	1	1	0
0	0	1	0	0	0	0	0	0	0	0	0
0	0	-5	0	0	0	0	2	0	0	1	0
3	0	0	0	0	1	-12	0	0	0	0	0
0	1	0	0	0	0	0	1	1	2	0	0
0	0	0	0	0	0	1	0	0	0	-10	0
0	0	0	3	0	0	0	1	0	0	0	0
0	0	0	0	0	0	0	0	0	0	0	0
2	0	0	1	0	1	3	3	0	0	0	0
0	0	0	2	0	0	1	0	1	0	1	0
2	0	1	0	0	0	1	0	0	0	1	0
0	1	0	1	1	1	0	0	1	0	1	0
0	0	0	1	0	1	0	0	0	0	1	0
0	0	2	0	0	0	0	0	-99	0	1	0
0	2	0	0	0	-4	1	0	-26	0	0	1
0	0	0	0	0	0	0	0	5	0	0	0
0	0	0	0	0	0	1	1	1	0	2	0
-6	0	1	0	0	1	1	0	0	1	0	0
0	0	0	0	0	0	0	0	0	0	0	1
1	0	0	0	0	0	0	0	0	0	0	0
0	4	0	0	0	0	1	0	0	0	0	0
0	0	0	1	0	1	0	0	1	1	0	0
0	0	0	1	0	0	2	0	0	1	0	0
0	9	0	0	0	1	1	0	1	2	1	0
0	1	0	0	3	0	0	4	1	0	0	0
0	0	0	0	0	1	0	2	0	-8	0	0
0	0	0	0	0	0	0	0	0	0	0	0
0	3	0	0	0	0	0	0	0	0	0	0
0	1	0	0	0	-12	0	0	1	1	0	2
0	0	0	0	0	0	0	0	1	0	1	0
0	2	1	1	0	0	0	0	-7	-12	2	0
0	0	0	0	0	6	1	0	0	0	0	0
0	0	0	1	0	0	2	0	0	0	0	0
0	1	0	0	2	0	0	0	1	0	0	0
1	0	0	0	0	0	1	1	0	2	0	0
0	0	0	-4	2	1	3	1	0	1	0	1
0	1	0	1	0	0	0	0	0	0	0	0
0	0	0	-5	0	0	0	-11	0	1	0	0
0	0	8	0	0	0	0	0	0	0	0	0
0	1	0	0	0	1	0	1	0	1	0	0
8	0	0	0	3	0	0	1	-12	1	0	0
0	0	-10	0	0	0	4	0	0	0	0	0
0	0	0	0	1	2	0	0	1	0	0	0
0	0	1	0	3	1	0	0	0	0	0	0
0	0	0	0	1	0	0	2	0	0	1	1
0	0	2	1	0	0	1	3	-38	0	0	0
2	1	0	0	0	-1	0	-13	-16	0	0	0
0	0	0	0	0	0	0	0	5	0	0	0
-9	0	0	2	0	1	0	3	1	0	2	0
0	0	0	0	0	0	0	1	2	0	-5	0
0	1	0	0	0	0	6	1	0	0	0	0
0	0	0	0	0	1	0	0	1	0	1	0
1	0	0	1	1	0	0	1	2	0	0	-10
0	0	0	0	0	1	0	0	0	0	1	0
0	0	0	0	0	0	0	-12	5	0	1	0
1	0	0	0	0	0	0	0	0	0	0	-13
0	1	0	1	0	0	0	1	0	0	0	0
1	0	0	0	0	0	0	0	0	0	0	0
1	0	-6	0	0	0	-128	0	0	0	1	1
-40	3	0	0	0	1	0	3	0	1	1	0
0	0	0	0	-65	0	0	1	1	0	0	1
0	-4	0	0	8	1	0	1	0	1	0	0
0	0	0	0	16	56	0	0	0	0	2	0
0	0	0	0	-8	0	0	0	0	0	2	-10
0	0	0	0	-85	0	0	0	0	0	3	0
0	0	0	0	-18	6	0	1	0	0	0	0
0	0	1	1	44	0	2	0	1	0	0	0
0	1	0	0	50	1	0	1	0	0	115	1
0	0	0	0	-79	0	0	1	0	-32	3	1
0	0	0	0	13	0	0	0	0	0	0	1
0	0	0	0	9	0	0	0	0	0	0	1
0	0	0	0	54	1	1	1	0	2	0	0
0	0	0	0	100	1	0	0	0	0	0	1
0	0	1	0	16	0	0	2	0	1	1	0
0	0	0	8	1	0	7	1	2	1	0	0
0	1	0	0	2	1	0	0	1	0	0	2
0	0	2	0	142	0	0	0	0	2	0	0
0	0	0	-10	-1	0	0	0	0	1	0	0
0	0	0	0	1	0	1	0	0	0	0	0
1	2	0	0	1	0	2	0	1	0	2	0
3	0	0	1	4	2	0	0	1	0	0	0
0	0	0	0	1	0	0	0	1	0	1	0
0	0	4	2	1	0	0	1	1	0	0	1
0	1	0	0	0	0	0	2	1	2	0	0
0	0	1	0	0	3	0	0	0	0	1	0
0	-13	0	0	0	0	0	1	0	0	0	0
0	0	9	0	-12	0	0	3	0	0	0	0
0	0	1	0	0	0	3	0	-24	1	1	0
0	0	0	0	0	1	0	0	0	0	0	1
0	1	2	0	0	0	0	0	0	2	0	2
1	0	0	0	0	0	0	0	0	1	1	0
0	1	0	0	0	1	0	0	0	1	1	0
0	1	0	0	2	3	0	4	0	1	0	0
0	1	3	0	3	1	0	0	5	0	0	0
1	2	1	0	0	0	0	0	0	1	0	0
0	2	0	-6	0	0	0	0	0	0	0	0
0	1	2	0	0	2	0	1	1	0	0	0
0	0	0	0	0	1	0	0	0	0	0	0
0	0	0	0	0	2	0	0	1	0	-4	0
0	0	1	0	0	0	2	0	0	-12	1	0
3	0	0	0	0	0	0	0	0	0	0	0
1	0	0	0	0	0	0	6	0	0	0	0
0	0	1	0	0	0	0	0	0	0	0	0
0	0	0	1	0	0	1	0	1	0	0	1
0	0	0	0	0	0	0	0	0	0	1	0
0	1	1	0	0	0	0	0	0	1	0	0
0	1	0	0	0	1	0	0	0	0	0	0
0	0	0	0	0	0	0	0	-5	7	0	0
0	0	0	0	0	1	0	0	0	1	0	2
0	1	0	0	0	0	0	0	0	0	0	-5
0	0	0	0	3	1	0	0	-11	2	0	0
0	0	0	1	0	1	1	0	2	1	6	1
0	1	0	0	0	1	0	2	134	0	1	0
0	0	1	0	1	1	1	0	1	1	0	1
0	2	0	2	0	2	0	0	1	0	0	1
0	0	0	0	1	0	0	0	1	0	0	0
1	0	0	0	0	0	0	0	1	0	0	0
0	0	1	0	0	0	0	0	0	0	-13	0
0	0	0	0	0	1	0	1	0	0	0	1
-10	0	0	0	2	0	0	0	0	0	1	1
3	0	0	4	0	-7	0	0	2	0	-6	0
0	0	0	0	0	0	0	7	0	1	2	0
0	0	0	1	4	1	0	0	0	0	0	2
3	0	0	0	0	0	0	0	0	0	1	2
0	28	0	9	2	0	1	0	0	0	0	3
0	0	1	1	0	-12	0	1	0	0	0	0
0	0	0	0	0	1	0	2	0	2	1	0
0	3	0	2	1	0	0	0	0	-7	0	3
0	1	3	0	0	-11	0	0	0	0	0	0
1	0	0	0	0	0	0	0	0	0	2	0
0	0	-4	0	-12	0	0	0	0	0	0	0
0	1	0	3	1	0	0	0	0	0	0	1
-40	2	0	1	0	0	0	0	0	0	1	0
29	3	0	0	0	0	0	0	0	0	-6	0
124	0	0	2	0	0	1	0	0	0	3	0
-6	0	0	0	0	0	1	3	0	0	0	0
-20	0	0	0	2	1	0	0	0	1	1	0
56	0	1	1	0	0	-4	0	0	2	0	1
-59	0	1	0	-9	-1	0	0	0	0	0	2
-10	0	0	0	0	0	0	0	0	0	0	0
-12	0	0	1	0	0	1	0	2	0	0	0
23	0	0	0	0	-13	0	0	4	0	-9	1
25	0	0	0	0	0	0	0	109	1	2	0
111	1	0	1	0	0	0	0	96	1	0	0
46	0	0	0	62	0	0	0	-1	0	2	1
61	0	0	0	-147	1	1	0	1	0	0	0
-116	0	1	0	-171	0	1	0	0	162	0	0
-94	1	0	0	42	0	0	0	0	0	2	1
-111	0	0	0	-11	0	1	2	0	0	0	0
-2	0	0	0	88	0	0	0	0	1	0	0
13	0	2	0	81	0	1	0	0	0	8	0
103	0	0	1	-30	0	0	0	1	0	4	1
28	0	0	0	-132	1	0	1	0	0	0	1
12	0	0	0	3	39	-12	0	0	0	1	0
-2	0	0	0	25	-84	0	0	0	1	0	0
-28	0	1	1	1	-5	0	0	0	0	0	0
-31	0	0	0	66	1	6	0	1	0	0	0
-27	0	-13	0	4	1	0	0	0	1	0	0
-14	0	0	0	2	0	0	0	0	0	2	0
-47	0	0	0	0	0	2	0	0	2	0	-4
-20	1	0	0	0	0	0	0	2	1	0	1
31	0	1	0	0	1	1	1	1	0	0	0
4	0	0	0	0	0	0	0	0	1	0	0
-62	-3	0	1	0	0	0	1	0	0	0	0
16	0	1	0	0	0	0	0	0	0	0	0
-6	1	1	0	0	0	0	0	0	0	0	0
-93	0	0	3	0	0	2	0	0	2	0	1
-61	0	1	0	1	0	0	0	0	0	0	0
-29	0	2	-4	0	0	0	0	0	0	0	0
-61	0	2	0	0	0	1	0	2	0	0	0
-16	1	1	0	0	0	0	0	-91	0	0	0
22	1	0	0	0	0	0	0	-129	0	0	0
83	-7	0	0	0	0	0	0	34	0	1	0
-151	1	0	0	0	1	0	0	5	0	1	6
-59	0	0	1	1	0	1	-13	1	0	0	1
-37	0	0	1	0	0	0	1	1	0	0	0
-124	0	0	0	2	0	0	0	1	0	0	0
45	0	0	0	0	0	0	0	0	1	1	0
5	3	1	0	0	0	0	0	0	2	0	0
-52	0	0	0	1	1	1	0	0	1	1	-13
51	0	1	0	3	0	0	0	1	1	2	0
60	0	1	0	0	0	56	0	0	0	0	1
14	0	0	0	1	3	0	0	0	1	0	-6
-12	0	0	1	0	0	0	0	0	0	-8	2
-10	0	1	0	0	1	0	0	0	2	0	0
-4	0	0	0	0	0	0	1	3	0	0	1
-18	0	0	0	1	0	1	1	0	0	0	0
-3	0	1	2	-26	0	1	0	1	0	1	0
76	0	0	0	0	0	0	-4	0	0	0	1
-30	0	2	0	-10	0	0	0	0	1	-12	0
10	0	0	0	0	0	0	0	1	1	0	0
119	0	0	0	1	0	-1	1	0	0	0	2
0	0	0	0	0	0	0	0	3	0	2	0
-72	0	0	0	0	1	1	0	0	2	1	0
82	2	0	0	2	2	0	0	0	0	0	1
-11	0	0	1	2	0	0	0	2	0	0	-6
-5	2	0	1	0	0	0	0	1	0	1	3
85	0	0	0	0	0	0	1	-15	0	1	0
-53	0	1	-13	0	0	0	0	23	0	1	1
56	0	0	-12	0	0	2	0	-12	0	0	0
0	0	0	0	0	0	0	1	2	0	0	0
1	0	28	0	0	2	1	0	1	0	0	0
0	0	0	0	0	0	-2	1	2	0	7	0
1	0	0	0	0	2	0	0	0	1	0	-9
0	0	3	1	0	0	3	1	0	0	0	2
0	-6	1	0	0	0	0	0	0	2	0	0
0	0	0	0	0	2	0	0	0	0	0	2
0	0	0	1	0	0	0	-12	1	3	0	0
1	0	0	1	0	0	1	0	1	0	0	0
0	1	0	0	0	0	0	0	0	0	0	2
0	0	1	1	0	0	0	6	0	1	0	0
0	0	2	2	0	0	1	0	1	0	0	0
0	0	3	2	0	0	0	0	1	2	0	0
0	0	0	1	0	0	3	2	0	0	0	0
0	0	0	0	1	3	1	0	0	0	0	0
1	0	0	0	1	1	0	1	0	0	0	2
-14	0	0	0	0	-12	0	0	0	0	0	0
0	0	0	0	0	0	2	0	3	0	0	0
1	0	0	0	0	0	1	0	0	0	0	0
0	0	0	0	0	0	2	0	1	0	1	0
3	0	0	0	0	1	0	2	0	0	0	0
0	0	0	0	3	3	0	0	0	0	0	8
0	0	0	1	2	1	0	0	0	0	0	0
0	0	1	0	0	0	0	1	0	0	1	0
-10	0	0	1	1	1	0	0	0	1	1	0
0	1	0	1	0	0	0	0	0	0	0	0
0	0	0	0	0	0	0	0	0	1	0	0
1	0	1	0	0	0	0	0	-43	0	0	0
0	0	0	0	1	0	0	1	66	0	0	0
0	0	0	1	0	0	1	0	-53	0	1	0
0	1	0	0	51	0	0	0	-4	3	0	0
0	0	0	0	-1	0	1	0	2	0	1	0
0	0	0	1	-30	0	0	0	0	0	0	1
2	0	0	0	-117	0	1	1	0	0	2	1
1	0	0	2	-82	1	1	1	0	0	3	0
0	8	0	0	-11	0	1	0	0	0	0	4
0	0	0	0	-33	0	1	0	0	1	1	0
0	3	0	0	-23	0	2	0	0	0	0	0
0	0	0	0	79	2	0	0	0	0	0	1
0	0	0	0	-34	0	0	0	0	0	0	0
2	0	1	0	41	0	0	1	0	1	0	1
0	0	0	0	-38	0	1	0	0	1	0	2
0	0	0	0	1	0	0	0	0	0	0	0
1	0	-3	0	0	0	-7	5	0	0	0	0
1	2	0	0	1	0	0	0	2	0	2	-8
1	6	0	0	1	0	1	0	0	0	0	0
0	0	1	1	1	0	0	0	-11	-98	0	0
0	-9	0	0	3	0	1	2	3	1	0	0
0	0	0	0	-11	0	0	0	0	1	0	0
0	0	1	0	1	0	-12	1	1	0	0	1
0	0	0	0	0	0	1	-2	0	1	2	0
0	1	0	0	0	0	0	0	2	0	1	-12
0	0	0	3	0	-49	0	3	0	0	0	1
0	0	0	1	1	-48	0	0	3	0	2	0
2	1	1	0	0	44	0	1	0	0	1	2
0	0	1	0	1	50	0	0	-146	0	0	0
0	1	-7	0	0	-61	0	0	-21	1	1	1
1	1	1	0	0	33	0	1	-11	0	1	1
0	-40	0	1	0	54	0	0	-25	0	0	1
0	0	0	2	0	1	1	0	-14	0	1	0
1	0	0	3	0	1	0	1	21	1	0	0
0	0	0	0	1	1	-1	0	110	0	0	0
0	0	3	0	4	1	0	3	2	0	0	7
0	0	0	0	0	0	0	1	0	2	0	0
-3	0	0	0	0	0	0	0	0	0	-12	0
1	0	0	0	-16	0	0	0	0	0	0	0
0	0	0	0	0	0	0	0	0	1	0	0
0	0	0	0	0	0	-13	2	3	1	0	0
0	0	0	0	0	3	0	1	0	0	1	0
1	0	0	0	1	0	0	2	2	0	0	0
0	0	0	0	0	1	1	0	0	0	0	0
0	0	0	1	0	0	0	0	0	1	1	0
0	0	0	0	0	0	0	0	0	0	0	0
0	0	0	0	0	0	1	0	0	1	0	0
0	0	0	0	0	0	0	0	0	0	0	0
0	0	0	1	0	0	0	0	0	0	0	0
0	0	0	0	1	1	6	0	0	1	0	0
1	0	0	0	0	0	0	0	1	0	0	0
1	0	0	2	0	0	0	0	0	0	0	0
0	0	2	0	1	0	0	1	0	0	0	0
0	0	0	0	1	0	0	0	2	0	0	0
1	1	2	0	1	0	1	1	0	6	1	1
1	0	0	0	0	0	0	-9	0	36	0	0
0	0	0	0	1	4	1	0	0	1	2	0
0	0	0	0	0	0	0	1	28	0	0	1
0	1	0	0	0	0	24	1	1	0	1	0
2	3	-6	0	0	0	1	1	1	0	1	0
0	1	0	0	0	0	1	1	1	1	0	0
1	0	0	0	0	0	0	2	1	0	0	1
1	0	0	1	0	0	0	0	0	0	0	1
0	0	0	0	0	0	0	0	0	1	2	0
0	0	-6	0	0	0	0	2	0	0	-7	0
2	0	0	-3	0	-6	0	0	0	0	0	0
0	0	0	0	0	3	1	1	1	1	0	0
1	0	0	0	0	0	0	0	0	0	0	0
0	0	1	1	0	0	0	-7	0	-7	0	1
0	0	0	0	2	1	1	0	0	4	0	0
0	1	0	0	7	0	0	1	0	0	0	1
0	0	0	0	1	0	3	0	0	0	0	0
0	0	0	1	2	1	0	1	0	0	0	2
0	0	0	0	0	2	0	0	0	1	0	3
1	0	0	0	0	0	0	-12	0	0	1	0
0	0	0	0	0	0	1	1	1	0	0	1
0	0	0	0	0	0	0	0	0	0	1	0
0	1	0	1	0	0	0	-11	0	0	0	0
0	0	0	1	2	0	0	0	0	0	2	0
0	0	0	-7	0	0	0	0	1	0	0	0
0	0	0	1	-13	0	0	0	0	0	0	0
0	0	0	0	0	0	0	0	1	0	0	0
1	0	0	0	-79	2	0	0	-13	0	0	0
0	0	0	0	-18	0	0	0	0	-12	0	0
0	3	0	0	18	0	0	1	2	0	1	2
4	1	0	3	-1	0	0	0	0	1	1	0
0	0	3	0	-29	0	0	-4	1	0	0	0
5	0	1	0	-14	4	1	1		1	0	0
0	1	0	0	-78	0	0	0		0	1	0
0	0	0	0	21	0	2	-1		0	0	0
0	0	0	0	11	2	0	0		0	-19	2
1	1	0	0	-28	3	0	0		1	0	1
2	0	1	0	7	2	0	0		-24	1	0
0	0	0	0	-86	0	0	0		0	0	2
0	0	0	0	-65	0	0	0		0	1	1
0	0	0	0	1	1	0	0		2	0	0
0	0	0	0	1	0	2	1		1	0	1
1	0	8	0	1	0	0	-13		0	0	0
0	0	0	0	1	0	2	0		0	0	1
1	0	1	0	2	-12	0	0		4	0	0
1	0	3	0	0	0	0	0		0	1	1
0	0	0	0	0	1	0	1		0	0	0
0	0	0	2	0	0	2	0		0	1	0
0	0	0	0	0	0	0	0		1	0	0
0	1	0	2	1	0	0	0		1	1	0
0	0	0	0	0	0	0	1		1	0	-12
-2	0	0	0	0	2	0	0		0	2	0
-14	0	2	0	0	0	0	0		0	1	0
0	0	6	0	0	0	0	0		0	0	0
0	0	0	0	1	0	0	6		2	0	1
0	1	-9	0	1	-9	0	0		2	1	0
0	0	0	0	0	0	0	0		0	1	0
0	0	0	0	-19	0	0	0		0	0	1
0	-10	0	0	2	0	3	0		5	0	0
0	3	1	0	3	0	0	0		1	0	0
0	0	0	0	2	0	1	1		0	0	0
0	0	0	1	0	0	-12	0		0	0	0
0	3	1	0	0	0	0	1		0	1	1
0	0	0	0	0	0	0	0		0	0	0
0	0	1	0	0	1	0	1		0	2	0
0	0	1	0	0	0	1	1		1	0	0
0	1	-40	0	1	0	0	0		5	0	0
3	0	0	0	-20	0	3	0		0	0	0
2	0	0	0	1	0	1	0		0	0	1
1	0	0	0	0	1	0	0		0	0	0
1	1	0	0	0	1	1	3		0	0	2
0	-12	0	0	0	-38	0	3		0	0	0
0	0	0	0	1	137	0	0		2	0	1
0	0	0	0	0	23	0	0		0	0	1
0	0	0	0	0	-30	0	0		1	0	0
0	0	0	0	1	1	0	1		0	0	0
0	1	0	0	0	54	0	0		0	2	0
2	72	0	0	2	0	0	0		0	1	2
4	-10	0	0	0	0	0	0		1	1	-7
0	2	1	3	0	0	0	0		0	2	0
0	103	0	1	0	0	0	0		0	0	0
0	-27	0	0	0	0	-6	0		0	0	0
0	-156	0	0	0	0	0	0		0	0	0
0	98	0	0	0	0	0	0		0	0	0
0	2	0	0	0	0	0	0		0	1	0
0	79	1	1	0	3	1	0		5	0	0
0	63	0	0	1	0	0	0		0	1	0
0	-120	0	0	1	1	3	0		1	0	0
0	45	0	0	1	0	0	0		0	0	1
0	29	0	0	2	0	1	1		2	1	0
2	119	0	0	0	0	0	0		0	2	1
2	8	0	8	0	1	0	2		1	0	0
1	-106	0	0	0	4	0	0		0	1	2
0	1	0	1	3	3	0	0		0	0	0
0	0	0	3	1	0	0	0		0	0	0
0	1	0	0	0	0	2	0		0	0	0
0	0	1	0	0	1	0	0		0	0	0
0	0	0	0	0	0	0	0		1	0	0
0	1	0	0	7	-10	0	0		0	0	1
1	0	0	0	0	0	0	2		0	0	1
0	0	1	0	0	0	0	0		-12	-12	0
1	0	3	2	0	1	0	0		1	0	0
0	0	1	6	2	0	0	2		0	0	0
0	0	0	0	0	0	0	0		0	1	0
0	0	0	0	0	0	0	0		0	0	1
-12	1	0	-9	1	0	0	0		0	2	0
0	0	0	0	0	0	0	2		0	0	0
1	1	0	0	0	1	0	0		0	0	0
1	0	0	0	0	0	0	0		0	0	0
2	-10	0	1	-15	1	0	0		0	0	0
0	0	0	0	-98	2	0	0		0	3	0
0	1	0	0	-10	0	0	0		-5	0	1
1	2	1	1	-31	2	-33	2		2	0	0
0	0	0	0	6	0	-25	0		0	0	1
0	0	0	1	85	0	1	0		0	0	0
0	1	0	1	-32	0	0	0		0	0	1
0	0	0	-11	2	0	0	0		0	0	0
0	1	0	0	-115	0	0	0		0	0	2
0	1	0	0	1	0	1	3		1	0	1
0	0	0	0	0	0	1	0		1	0	0
0	0	0	0	1	0	0	1		1	0	0
0	0	1	0	1	1	0	-12		2	1	1
0	0	0	0	2	0	0	0		0	0	1
0	2	0	0	1	0	1	0		0	1	0
0	0	0	0	-8	0	0	0		0	0	0
0	-3	0	0	2	0	0	1		0	0	0
2	1	0	0	0	0	0	0		0	0	0
0	1	0	0	1	1	0	3		3	0	0
1	0	3	0	0	0	0	1		0	0	1
2	0	1	0	0	0	1	0		0	2	0
0	0	0	0	1	0	0	0		0	3	2
0	0	0	1	0	0	0	1		0	0	1
1	0	1	0	0	0	4	0		0	0	0
0	1	0	0	0	0	0	0		0	0	0
0	1	0	0	1	7	0	0		0	0	0
0	1	1	0	0	0	0	0		0	0	0
0	0	0	0	1	0	0	0		0	1	0
0	0	0	1	0	0	0	0		0	0	0
1	3	0	0	0	0	0	0		0	0	0
0	0	0	0	0	1	0	0		0	0	0
1	0	0	0	0	3	0	0		0	0	-10
-3	1	0	0	1	2	0	0		0	0	0
0	0	0	0	0	0	-6	0		0	0	0
0	1	0	0	-12	0	0	0		-6	1	0
2	0	0	0	0	0	7	-6		0	0	0
2	0	0	0	0	0	0	1		2	0	0
1	0	0	0	0	0	3	0		-13	0	1
0	0	0	1	0	0	0	0		0	1	1
1	0	0	0	0	1	0	0		-9	0	2
0	1	1	0	1	0	0	1		0	0	2
0	0	0	0	1	1	1	0		4	0	0
1	7	0	1	1	0	0	3		0	0	0
0	0	0	3	0	0	0	0		0	0	0
0	0	0	1	0	0	1	1		0	0	0
0	1	0	0	0	1	2	0		0	0	0
1	0	0	0	0	0	0	0		0	0	1
0	4	1	0	4	0	0	0		61	1	0
0	0	1	0	0	0	0	0		0	0	0
0	0	0	0	0	1	0	0		0	0	1
0	0	0	0	2	0	0	0		3	0	0
0	1	-10	0	0	0	0	2		1	1	0
0	1	3	0	0	0	0	0		0	1	1
0	0	0	0	1	3	1	0		1	0	2
0	0	3	1	0	0	0	0		0	0	0
0	0	0	0	-12	1	0	0		0	1	1
0	-2	3	0	0	2	2	0		1	0	0
0	-14	0	0	0	0	0	0		1	2	0
0	0	0	0	0	1	0	0		0	0	0
0	0	0	0	0	0	0	0		2	0	0
0	0	0	0	0	0	0	0		0	1	0
3	0	0	0	1	0	4	0		1	0	0
0	0	1	0	0	1	0	0		1	1	0
0	0	0	1	0	0	0	1		0	1	0
1	0	0	0	0	-13	2	0		1	0	-12
0	0	0	0	0	0	3	0		1	0	0
1	0	1	1	0	1	2	0		0	0	0
1	0	-12	0	0	0	0	0		0	0	1
2	0	0	0	1	79	0	0		0	1	0
1	0	0	0	0	1	0	0		0	0	0
0	0	0	0	0	3	1	-21		0	0	2
0	0	0	0	0	1	0	0		0	1	0
0	0	0	0	0	0	0	0		0	0	0
0	1	1	0	0	0	0	1		0	0	0
0	0	80	3	1	0	0	0		0	1	0
0	0	-43	1	0	1	3	0		0	0	0
0	0	29	0	0	0	-12	1		0	0	3
0	0	23	0	3	1	0	1		0	0	0
0	0	0	1	0	0	1	0		0	0	0
0	3	0	0	2	1	0	0		1	0	0
0	0	0	0	1	4	0	0		0	0	0
0	0	0	1	0	0	0	0		0	0	0
2	2	0	0	0	-16	0	0		1	0	0
0	1	0	0	65	0	0	1		0	0	0
3	1	0	0	-24	1	0	0		2	0	0
0	0	0	0	27	0	2	0		0	1	0
1	1	1	0	18	0	0	0		1	1	1
0	0	1	0	82	0	0	0		0	1	0
0	0	2	0	41	1	0	0		1	0	0
0	0	0	0	66	0	-9	0		0	-7	1
0	0	0	0	31	0	0	0		0	4	0
0	0	0	0	-14	0	0	1		0	0	0
0	0	0	0	1	0	0	0		0	0	0
0	0	0	0	1	0	0	0		0	0	0
0	0	1	0	56	0	0	0		0	1	0
0	0	0	1	-1	0	0	0		0	0	0
0	0	0	0	1	0	0	0		0	0	2
0	2	0	0	2	-11	0	-6		0	0	3
0	4	1	0	1	1	0	0		0	0	0
0	0	0	0	1	-6	1	7		3	0	0
0	0	3	0	0	0	0	0		0	0	0
0	0	1	0	1	0	0	3		0	0	0
0	0	0	1	0	0	0	0		1	0	0
0	0	0	1	0	1	0	0		0	0	1
0	0	1	0	0	0	0	0		0	0	0
0	-1	0	0	3	0	1	0		0	0	0
0	0	0	-10	-155	1	0	1		2	0	0
0	0	7	3	0	1	0	0		1	0	0
1	0	0	0	0	0	1	0		0	0	0
1	0	0	3	0	0	-24	0		0	2	0
0	0	0	0	0	1	54	1		0	-12	1
2	0	1	3	0	1	0	2		0	0	0
0	0	1	0	1	1	0	0		0	0	0
0	0	0	0	0	0	0	0		1	1	0
0	0	0	0	1	0	0	0		0	0	1
1	0	0	0	0	0	0	0		3	1	0
1	0	0	0	0	1	0	0		0	0	0
0	2	-2	1	1	0	1	0		0	0	0
0	2	-14	0	1	0	0	0		0	0	0
0	1	0	0	2	0	0	1		0	0	0
1	0	0	0	0	0	4	0		12	0	0
0	0	0	1	0	1	0	0		2	1	0
0	0	0	-12	0	0	3	0		0	1	0
1	0	0	0	1	0	0	0		1	0	1
2	0	0	0	0	0	1	2		0	0	0
0	0	0	0	0	0	0	0		0	0	0
0	0	0	0	0	0	0	0		-20	0	0
0	1	0	0	2	0	0	0		0	0	0
0	0	0	1	1	0	0	0		0	4	0
1	1	0	80	0	0	-10	0		0	0	1
-101	0	0	-43	0	0	0	4		1	0	1
0	0	0	0	3	0	0	0		1	0	0
2	0	0	0	0	0	0	0		1	1	0
0	0	0	0	0	0	0	2		0	1	1
1	0	0	0	0	0	1	3		0	1	2
0	-12	0	1	0	0	0	2		1	0	0
0	0	1	1	0	0	0	0		0	0	2
0	1	0	2	2	0	0	0		0	0	0
0	0	1	0	0	0	0	0		1	2	0
0	1	0	0	0	0	0	1		0	2	1
0	2	0	0	0	0	2	0		3	0	0
0	0	0	0	0	2	0	0		0	0	1
0	1	0	0	0	0	0	0		0	5	1
0	0	0	0	0	0	0	0		0	1	0
0	0	3	0	0	0	1	3		1	0	0
0	-7	1	0	-5	7	0	-12		0	0	0
0	0	1	0	-1	0	0	0		3	0	0
1	1	0	0	0	1	3	1		0	0	1
0	0	0	0	0	2	1	0		1	2	0
5	0	0	3	0	2	2	0		0	0	0
1	0	2	1	1	3	0	0		0	0	1
1	0	1	0	1	0	2	0		0	1	0
0	0	1	1	0	0	0	0		0	5	0
0	0	0	0	0	0	0	0		0	0	1
0	0	0	7	0	0	0	0		0	0	1
0	0	1	0	0	1	0	2		0	0	0
1	0	0	0	1	0	0	1		0	0	0
0	0	0	0	2	0	0	0		0	0	0
1	0	0	1	0	0	0	0		0	2	0
0	0	0	1	0	0	0	0		0	0	0
1	0	1	0	0	0	0	-9		0	1	0
0	0	0	0	0	2	0	0		1	0	0
0	0	0	0	0	0	1	0		0	1	1
0	0	0	-2	0	0	0	0		1	2	1
0	0	0	0	-20	-13	0	0		-71	1	1
0	0	0	0	24	0	0	0		0	0	0
0	0	0	0	-17	-71	0	0		2	0	-7
0	0	0	0	153	-10	0	0		1	0	4
0	2	0	0	33	-1	0	0		0	1	0
0	0	0	0	-37	-14	0	0		2	0	0
0	1	2	0	-14	-56	1	0		0	0	0
0	0	4	0	146	-57	0	0		0	0	2
0	1	0	0	3	2	0	1		0	0	1
0	0	0	0	116	0	0	0		0	0	0
2	3	0	0	30	0	0	0		0	1	0
-9	2	0	0	23	0	0	0		0	0	0
0	0	0	0	130	0	0	0		0	0	0
0	0	0	0	1	0	7	0		-6	2	0
0	0	-1	0	1	0	0	1		0	0	0
2	0	0	0	1	1	0	0		0	1	0
0	1	0	0	1	0	0	0		0	0	0
1	0	0	1	3	0	0	1		2	0	0
0	0	0	0	1	2	1	62		0	0	0
0	0	0	1	1	0	0	0		0	0	0
0	0	0	0	-10	0	1	0		-11	0	0
0	0	0	0	0	0	3	1		3	0	0
4	0	0	0	0	1	2	0		0	0	0
0	0	0	0	0	0	0	0		3	1	0
0	1	0	0	0	1	0	0		0	0	0
0	0	0	3	2	-20	0	0		0	0	0
1	1	0	1	0	1	0	0		1	-12	0
0	-3	2	1	-18	0	0	-10		0	1	2
0	0	2	0	1	0	0	0		0	0	-12
0	0	1	0	0	0	1	0		0	0	0
2	3	0	0	0	1	0	0		0	0	0
2	2	0	2	0	0	1	0		2	0	1
1	0	0	1	0	1	0	0		0	0	0
0	2	0	1	1	0	0	1		0	0	1
0	1	0	0	2	0	0	0		0	0	0
0	0	0	0	14	0	1	0		0	1	0
0	0	0	1	1	1	0	0		3	0	0
0	1	1	0	0	0	0	0		0	0	0
0	0	0	1	1	0	0	0		0	5	0
0	0	1	0	1	2	1	2		-14	0	1
0	1	0	0	3	0	0	0		0	0	1
0	0	1	0	1	0	0	0		0	-5	0
1	0	0	0	1	0	0	0		-10	2	0
0	0	0	1	0	0	0	0		2	0	0
-10	0	0	0	1	0	3	1		0	0	0
0	0	0	0	0	0	0	0		0	0	4
-6	0	0	0	0	1	1	0		3	0	0
0	0	0	0	0	0	0	0		1	0	0
0	1	-12	0	0	0	2	3		0	1	0
0	0	0	0	0	0	0	1		2	0	1
0	0	1	0	0	0	1	2		0	0	1
0	0	0	0	1	0	0	0		0	3	1
0	1	1	0	0	1	0	0		0	0	0
0	0	1	2	0	0	0	2		0	0	0
0	0	2	0	1	0	1	0		0	0	0
0	0	0	4	0	1	0	0		0	2	2
0	0	1	0	0	1	-13	0		0	0	2
0	0	0	0	0	1	0	0		0	0	0
0	0	0	0	1	-11	0	0		2	0	2
3	0	-7	0	2	0	1	0		0	0	0
0	0	0	0	0	2	0	0		0	0	0
0	0	0	0	0	1	0	0		0	0	5
0	1	1	-1	0	0	0	0		1	0	1
0	0	0	0	0	0	1	0		0	0	0
0	0	0	0	0	0	0	0		0	0	0
0	0	0	0	0	0	0	0		0	0	0
-1	0	0	0	1	0	0	1		3	0	0
0	0	0	0	0	0	1	0		0	0	2
1	0	0	0	0	0	0	0		0	0	0
0	0	0	0	0	0	0	0		2	0	0
1	0	1	0	3	1	0	0		0	0	1
0	0	0	0	0	0	0	0		0	0	5
0	0	0	0	0	3	0	0		0	0	0
0	0	0	0	0	0	1	0		0	0	0
0	0	0	0	0	0	0	1		0	-6	0
0	0	0	2	0	1	0	0		-4	0	0
1	3	0	2	0	-10	0	0		69	0	0
2	0	0	1	1	0	0	0		0	2	2
1	0	0	0	0	0	0	0		0	-13	0
0	1	0	0	0	3	0	0		0	1	1
1	0	0	0	0	0	0	0		0	0	0
0	0	0	0	0	2	0	7		0	-9	1
0	0	0	0	0	7	0	0		0	0	2
0	1	0	0	2	0	-11	0		0	4	1
0	1	2	0	0	2	1	0		0	0	0
0	0	0	1	0	1	0	0		0	0	0
0	2	1	0	0	0	-6	1		0	0	0
0	0	0	1	-12	0	0	0		0	0	1
0	0	1	0	0	0	0	4		0	0	0
1	0	0	1	0	0	0	1		3	0	1
1	1	3	0	0	2	1	0		0	0	0
0	2	2	0	0	0	0	3		1	61	0
0	0	0	0	-69	0	0	2		0	1	0
0	0	0	0	-2	0	0	0		0	0	0
0	0	0	0	4	0	0	0		0	1	2
1	0	0	0	42	0	0	0		0	0	0
1	0	0	-12	31	1	1	0		1	0	1
0	0	-5	0	-36	6	1	0		0	5	0
1	0	1	1	51	0	0	0		0	0	0
0	0	0	0	-14	0	0	1		1	1	0
2	0	0	1	1	0	1	0		1	1	0
0	0	0	1	-1	-15	1	1		1	0	0
0	0	0	2	1	0	1	0		0	2	0
0	0	0	0	1	85	1	0		0	0	1
0	0	0	1	1	2	0	0		1	1	0
0	0	0	0	1	2	0	1		1	1	0
0	1	0	0	1	0	0	0		-13	0	-12
0	0	1	-7	2	0	1	0		0	0	1
7	0	0	0	1	0	0	0		0	1	0
0	0	1	0	2	0	0	1		2	0	0
0	0	-3	0	0	1	0	0		0	1	0
0	2	0	1	0	0	0	0		1	0	0
0	0	0	0	0	1	0	0		0	0	0
0	0	3	0	0	0	0	0			0	0
0	3	2	0	1	0	0	0			0	0
3	0	0	0	0	1	1	3			0	0
0	0	0	0	0	1	0	3			0	1
0	1	2	0	0	0	0	0			0	0
1	1	1	0	-6	1	0	1			3	0
1	0	0	1	0	0	0	0			0	-2
1	0	0	0	0	0	1	0			0	0
-9	1	1	0	0	0	0	2			0	5
2	0	0	0	0	1	0	0			0	0
0	0	0	0	0	0	0	1			0	0
0	0	1	0	1	1	0	0			0	-5
0	0	1	0	0	1	0	0			1	2
0	0	0	0	0	0	0	0			0	0
-4	0	0	0	0	0	0	1			0	0
1	0	0	0	0	1	0	0			0	0
0	2	0	0	0	0	0	-13			1	0
0	0	0	0	1	1	0	0			0	0
0	0	0	0	0	0	0	0			2	1
0	0	0	0	1	0	0	1			0	0
0	0	0	0	0	0	0	1			1	0
0	0	0	0	1	0	0	0			0	3
0	0	1	0	0	1	0	0			1	0
0	0	0	2	0	1	0	1			0	0
0	0	0	0	0	0	0	0			0	0
0	0	0	1	0	4	0	0			-80	2
-16	0	1	0	0	0	0	0			4	0
0	0	0	1	2	0	2	1			0	0
0	1	0	0	0	0	0	0			0	0
0	0	0	3	0	0	0	0			3	0
1	0	0	2	0	0	0	0			0	0
-13	0	0	0	0	2	0	0			0	0
0	0	0	0	0	0	7	0			0	0
0	0	0	0	0	0	0	1			0	0
0	0	0	0	5	0	1	0			1	0
1	1	0	0	0	0	2	0			0	0
0	0	1	-5	0	0	2	0			0	0
0	1	0	1	3	1	0	0			0	0
0	0	0	0	0	0	0	0			2	0
0	0	0	0	2	-12	0	0			0	0
0	2	0	0	0	0	0	0			1	0
1	0	0	0	4	0	0	0			0	0
0	0	0	0	0	0	1	0			0	0
1	0	0	0	0	0	0	0			0	0
0	1	0	0	1	0	0	-11			0	-6
0	1	0	0	1	0	0	1			0	0
0	1	0	1	0	1	2	0			0	0
1	0	0	0	0	0	4	-6			0	2
0	1	0	1	0	0	0	0			1	-13
0	0	0	-3	1	0	0	0			0	1
0	0	0	0	0	0	2	0			0	0
0	0	1	0	0	0	0	1			3	-9
0	0	3	3	0	0	0	0			0	0
0	2	0	2	1	0	-11	0			0	4
0	1	0	0	0	0	0	0			0	0
0	1	1	0	1	0	-13	0			0	0
1	0	1	2	0	0	0	0			12	0
-4	0	0	1	0	0	2	1			2	0
0	0	0	0	0	0	-44	1			0	0
0	0	0	0	1	0	-41	0			1	0
1	0	1	1	2	0	0	0			0	0
1	0	1	0	4	0	0	1			0	1
0	0	0	0	0	0	0	1			0	0
1	1	2	0	0	1	2	1			1	0
1	2	0	1	-16	0	0	1			0	5
0	0	0	1	8	0	0	0			1	0
0	0	0	0	7	-6	0	0			1	1
0	0	1	0	27	0	0	0			0	1
0	1	2	0	23	0	1	1			0	0
0	0	0	0	21	0	0	0			1	2
0	1	0	0	-118	0	1	0			1	0
0	-101	0	0	-34	0	0	0			0	1
0	0	0	0	-1	1	0	0			0	1
0	2	0	0	1	0	2	0			0	0
0	0	0	0	3	1	0	0			0	0
0	1	0	1	1	0	0	0			3	1
1	-6	0	0	1	1	1	1			0	0
0	0	0	0	0	0	0	0			0	1
1	0	0	0	0	0	0	0			0	1
0	0	0	1	0	0	0	0			1	0
6	0	0	0	1	0	0	0			1	0
0	0	0	0	0	0	2	1			0	0
-8	0	0	0	0	0	0	0			3	0
0	0	1	0	0	3	0	-6			0	0
0	0	0	0	0	0	0	0			1	0
2	1	1	0	0	0	0	0			0	0
0	0	0	0	0	0	0	0			0	3
0	0	1	0	1	2	0	0			0	0
0	0	0	0	0	0	1	0			0	0
1	0	0	0	1	1	0	0			0	0
0	0	0	1	0	0	0	0			0	0
0	0	2	0	0	0	0	0			0	0
8	0	0	0	0	0	0	0			0	0
0	0	0	0	1	0	0	0			0	0
0	0	0	0	0	0	0	0			1	1
1	1	0	0	0	18	0	0			0	1
0	0	3	0	-18	-14	0	0			0	0
1	4	0	0	1	30	0	0			0	0
0	5	0	0	1	26	1	0			0	0
-12	1	1	0	1	1	0	0			0	0
0	1	1	0	0	-1	0	0			1	1
0	0	0	0	0	0	0	0			0	0
2	0	0	0	0	0	1	0			1	2
1	2	1	0	1	3	0	2			0	0
0	4	0	0	0	0	0	0			1	1
0	0	0	0	1	0	1	0			2	0
0	1	0	0	0	0	1	0			0	1
0	0	0	0	1	1	-11	0			0	-80
3	1	0	1	0	0	1	7			0	0
0	0	0	3	0	1	0	0			0	4
0	0	0	0	1	0	0	1			2	0
0	0	0	0	1	0	0	0			0	0
1	0	0	1	0	0	2	2			0	3
0	0	0	1	0	0	1	2			0	0
1	1	2	0	1	1	1	0			0	0
0	0	0	0	0	0	0	0			-6	0
0	1	2	0	0	0	0	0			0	0
2	0	3	1	0	0	0	0			0	1
1	1	0	1	1	1	0	0			0	0
1	0	0	0	0	0	0	0			2	0
0	0	0	2	0	1	0	1			0	0
0	0	0	0	0	1	0	0			0	2
1	0	0	0	1	1	0	0			0	-13
-5	0	0	0	1	2	0	0			-11	0
0	0	0	0	1	0	0	2			3	1
1	0	0	1	0	0	1	4			0	0
0	0	0	2	2	2	0	0			3	0
0	0	0	0	0	0	0	0			0	0
1	0	0	0	1	0	3	2			0	0
0	0	0	0	1	1	0	0			1	0
0	0	1	0	0	0	0	2			0	0
1	0	0	0	0	1	1	-11			0	0
0	0	0	0	0	1	-10	0			0	0
0	1	0	0	0	0	2	-13			0	0
2	0	0	0	0	0	0	0			2	0
4	2	0	0	3	0	0	2			0	1
0	-9	0	0	0	0	3	0			0	0
0	0	1	0	0	1	0	0			0	0
0	0	0	0	0	0	0	0			3	3
3	0	1	0	0	0	2	0			0	0
44	0	0	0	1	1	7	1			0	0
-12	2	0	1	1	2	0	0			2	0
33	0	2	0	0	1	0	1			0	0
67	1	0	1	8	0	2	0			3	12
15	0	0	0	-13	0	1	0			0	2
35	0	0	1	5	3	0	2			1	0
0	0	1	0	-15	0	0	0			0	1
51	0	-7	0	-47	1	0	-7			3	0
22	0	1	0	-12	0	0	0			2	0
66	2	1	2	-87	0	1	1			0	0
62	4	1	0	-63	0	0	0			0	0
-34	0	0	0	-119	0	0	0			0	1
48	0	1	0	-40	0	0	0			0	1
62	0	0	0	-33	2	0	0			0	0
-14	0	0	3	3	0	0	2			0	0
[truncated: 40,631 more rows]

## Sheet: C
Supplemental Table S6. In silico assessment of MELT accuracy and features.
(C) Assessment of length accuracy at various sequence coverages
	7.5x			15x			30x			60x
MEI	Mean	SD	N	Mean	SD	N	Mean	SD	N	Mean	SD	N
Alu	4.97	29.24	39593	2.36	21.27	42793	1.23	15.6	43938	0.83	12.82	44334
L1	65.07	486.78	4681	41.79	410.24	5061	25	325.56	5301	15.92	276	5398
SVA	-229.11	381.51	1912	-258.83	384.42	2144	-274.96	372.18	2209	-280.99	363.91	2231

## Sheet: D
Supplemental Table S6. In silico assessment of MELT accuracy and features.
(D) Assessment of strand accuracy at various sequence coverages
Test	Alu				L1				SVA
	7.5x	15x	30x	60x	7.5x	15x	30x	60x	7.5x	15x	30x	60x
1	91.7	94.35	93.18	93.51	84.21	88.62	89.43	86.99	66.67	83.33	80	77.78
2	92.38	93.71	94.31	94.83	79.44	84.75	90	89.26	80.49	86.67	89.13	91.3
3	92.06	93.9	93.74	94.36	83.93	89.26	90.98	91.06	75.61	86.36	89.13	84.78
4	91.82	95.28	94.62	94.31	72.57	88.98	89.34	88.52	75.68	88.37	81.4	79.55
5	91.78	94.01	94.16	94.34	88.5	89.92	89.26	89.34	80.56	90.91	88.89	91.11
6	92.68	94.53	93.66	92.82	75	83.33	85.25	86.89	84.21	90.48	88.37	88.1
7	91.91	93.68	94.13	94.4	83.93	86.44	91.8	91.8	83.33	88.37	90.7	88.64
8	92.52	94.08	94.87	93.33	79.49	81.97	82.93	84.55	76.32	88.37	86.05	84.09
9	92.57	94.13	94.46	95.17	81.82	91.23	87.29	87.5	83.33	93.33	89.13	86.96
10	91.77	94.09	93.94	93.95	75.23	86.55	88.98	90.83	79.49	88.64	95.56	95.45
11	91.48	93.82	93.2	94.5	82.61	88.98	89.26	90.08	78.95	95.45	93.18	95.56
12	93.51	95.43	94.74	93.67	70.8	87.07	89.17	90.98	78.05	88.64	93.33	93.33
13	91.54	92.98	93.46	92.74	70.94	84.3	87.7	89.43	77.5	88.37	81.82	79.55
14	93.42	94.62	94.86	95.16	84.4	91.23	91.53	92.5	86.11	85.71	83.72	84.44
15	90.94	93.51	94.59	94.62	75.68	87.39	86.07	86.89	80	90.91	90.91	91.11
16	92	94.51	94.86	93.53	75.45	87.5	89.17	89.26	87.88	92.86	85.37	80.95
17	91.3	94.82	95.43	95.04	78.9	93.28	94.12	93.28	75	89.74	90.24	90.91
18	92.22	93.99	94.35	94.3	76.92	86.78	88.71	87.9	75.68	81.4	84.44	84.44
19	92.91	95.05	94.92	94.41	80.91	89.66	89.08	90.83	78.79	87.8	90.91	91.11
20	91.72	94.51	94.37	93.43	83.76	92.62	92.68	90.24	84.62	90.91	88.89	88.64
21	91.61	94.67	94.53	95.7	80	86.21	86.44	84.17	71.11	84.09	88.89	86.96
22	91.6	94.19	93.62	93.23	76.15	86.32	90.68	89.92	75	90.91	88.89	91.11
23	93.33	95.07	94.27	92.74	79.63	83.9	88.33	87.6	72.97	76.74	77.78	80.43
24	92.5	94.06	94.41	95.29	77.06	86.84	88.98	88.14	84.62	95.12	93.33	91.3
25	91.17	94.85	95.23	94.22	77.88	83.9	85.95	87.6	91.67	92.31	91.11	91.3
26	91.07	93.3	93.26	93.05	78.38	85.71	88.24	88.24	80	89.13	93.18	93.18
27	91.04	92.92	94.44	93.22	79.44	89.83	87.6	88.52	90	100	100	100
28	90.2	93.84	94.07	94.37	77.88	88.89	90.83	92.44	76.92	88.1	88.89	86.96
29	93.35	93.01	94.45	94.27	77.27	86.09	90.52	89.57	87.8	86.05	88.89	88.89
30	92.38	93.95	95.03	94.87	77.48	88.43	91.06	87.9	72.73	90.24	97.62	93.02
31	93.81	94.41	94.39	95.69	77.19	86.55	91.67	90.83	87.18	95.35	93.18	91.11
32	92.37	94.09	94.19	94.58	84.82	90.83	91.8	90.98	78.38	86.05	86.36	84.09
33	93.28	94.92	95.15	95.39	79.28	83.61	87.7	86.29	78.38	88.64	89.13	89.13
34	91.93	94.55	94.7	93.85	78.5	87.93	89.83	89.92	70.73	81.82	86.67	84.09
35	91.19	94.08	94.45	94.27	76.79	86.78	90.08	89.43	71.05	86.36	93.33	91.3
36	92.19	92.49	93.11	92.61	78.3	88.6	91.45	91.6	74.36	85.71	88.37	88.37
37	92.98	94.43	94.48	94.45	79.13	92.5	89.26	90.98	75	76.19	83.72	84.09
38	92.21	95.33	95.24	94.04	77.88	89.92	90.91	89.34	75.68	88.1	88.37	88.37
39	94.16	95.34	95.94	95.84	79.09	88.03	90.68	90	74.36	86.36	90.91	88.89
40	93.34	94.76	95.13	93.91	82.14	88.7	90.68	91.53	92.5	95.45	97.78	97.78
41	94.07	94.95	95.42	93.79	84.82	89.66	90.68	89.08	80	86.36	93.33	91.11
42	91.55	93.5	93.72	94.83	79.44	90.27	89.57	88.89	78.95	90.48	88.89	88.64
43	91.86	94.55	95.21	93.71	74.77	87.72	90.35	89.57	78.95	90.24	90.7	86.36
44	92.41	95	95.58	95.16	76.58	87.07	88.89	89.74	82.86	92.31	90.48	90.7
45	91.74	94.39	93.98	93.7	74.53	87.29	86.67	87.5	78.95	85.37	85.71	86.05
46	90.83	93.06	94.34	92.86	73.15	87.72	87.29	89.08	86.49	90.91	93.18	88.64
47	91.78	93.93	94.2	93.92	77.88	87.29	90	90.91	70	79.55	80	80.43
48	92.34	94.17	96.08	96.18	81.31	89.74	90.08	90.91	81.58	86.05	86.96	86.67
49	91.89	94.63	94.55	93.77	76.58	88.24	88.52	89.43	76.32	86.05	84.44	84.44
50	91.56	94.12	94.82	94.54	83.19	87.18	93.39	92.56	81.08	97.73	97.73	97.78

## Sheet: E
Supplemental Table S6. In silico assessment of MELT accuracy and features.
(E) Alu subfamiliy assignments at various sequence coverages
Test	7.5x-Subfamily	7.5x-Family	15x-Subfamily	15x-Family	30x-Subfamily	30x-Family	60x-Subfamily	60x-Family
1	85.3129	10.6003	92.8235	4.58824	95.9091	2.72727	95.2968	3.02352
2	84	10.625	93.5897	4.54545	95.7907	2.61661	95.838	2.47469
3	86.7246	9.92556	95.7796	3.04807	95.7859	2.73349	96.1669	2.02931
4	83.0189	10.1887	92.562	5.19481	94.3872	3.55097	95.2164	2.84738
5	86.3464	8.34387	93.772	3.76028	95.7666	2.28833	96.7195	1.47059
6	82.197	11.7424	93.5972	4.19092	95.6965	2.49151	95.9596	2.6936
7	85.5091	10.1828	94.6301	3.81862	95.5121	2.3015	96.8	1.6
8	82.793	11.596	93.2715	4.87239	95.439	2.96465	95.5932	2.59887
9	83.2714	11.6481	92.7503	4.94822	95.7062	2.71186	96.5208	1.79574
10	84.6835	11.6456	93.2624	4.13712	94.508	2.97483	95.7763	2.51142
11	85.0617	8.51852	94.5158	3.3839	94.7846	2.83447	96.0718	2.0202
12	85.8926	9.23845	94.2556	3.39977	96.3429	2.62857	95.5882	2.94118
13	85.9453	10.5721	93.6709	3.79747	96.1669	2.02931	96.5363	1.78771
14	85.2903	8.77419	93.8012	2.92398	95.0913	2.62557	95.7207	2.13964
15	85.5346	9.0566	93.511	4.63499	94.482	3.71622	96.3004	2.46637
16	82.875	11.625	93.8084	3.27103	95.3143	2.17143	95.5732	2.04313
17	83.7596	11.1253	93.4118	3.41176	96.4612	2.16895	96.2796	1.91657
18	84.9435	8.90841	94.4641	3.298	95.5069	2.30415	96.3512	1.59635
19	85.3018	10.8924	93.1604	3.89151	94.5824	3.386	95.0838	3.46369
20	84.796	10.8776	93.3714	3.54286	96.0586	2.13964	96.2138	2.11581
21	83.8548	10.6383	94.2012	3.66864	95.2164	2.84738	95.5882	2.26244
22	84.4784	9.54198	93.4834	3.08057	95.1025	2.16401	95.5982	1.46727
23	87.1795	8.07692	94.3662	3.28638	95.0688	2.75229	95.9184	2.60771
24	83.3118	11.2549	92.2002	4.77299	94.7489	3.3105	95.5157	3.02691
25	86.3808	9.70996	94.5029	3.62573	95.0057	2.95119	95.8097	2.49151
26	83.0189	10.0629	93.6545	3.87779	95.0857	3.08571	95.672	2.61959
27	84.8259	10.8209	94.8897	3.71661	95.2381	3.51474	95.9322	2.48588
28	84.3672	11.0422	93.2558	5	95.7811	2.2805	95.8333	2.59009
29	85.069	9.91217	93.3566	4.662	95.1302	2.94451	95.7303	2.47191
30	82.338	12.4524	91.3405	5.81257	93.9954	3.69515	94.2987	3.53478
31	85.6061	8.71212	93.4808	3.2596	95.5378	2.28833	96.0272	1.70261
32	85.2417	10.0509	93.0475	4.28737	95.5581	2.3918	95.3672	2.48588
33	84.4527	9.70149	94.5727	3.81062	95.0395	3.15671	96.1798	2.13483
34	84.9937	10.8449	92.9316	4.98262	94.7012	3.83315	95.9732	2.57271
35	87.044	8.80503	93.3798	3.83275	95.5832	2.83126	95.8427	2.69663
36	85.9375	9.24479	93.3099	3.52113	94.8335	2.52583	95.7907	2.16155
37	85.8418	8.92857	93.0095	4.50237	94.9367	3.10702	95.017	2.49151
38	86.809	8.54271	92.6488	4.78413	95.8097	2.60476	95.1685	2.47191
39	84.0994	10.559	93.3566	4.77855	94.2503	3.26945	94.4882	3.48706
40	84.799	9.67337	94.8718	3.2634	95.923	2.94451	96.0541	2.81849
41	86.2113	9.66495	93.067	4.58284	94.7308	2.74914	94.6953	1.91874
42	84.6351	10.4994	91.9861	4.87805	95.4338	2.62557	94.3757	2.92463
43	85.1145	11.3232	93.3875	4.87239	95.7811	2.50855	95.7303	2.80899
44	85.8407	9.60809	94.6512	3.25581	95.2435	2.49151	95.7255	2.47469
45	86.0229	8.64041	94.152	3.39181	96.4773	1.93182	96.5129	1.79978
46	85.1759	11.3065	94.1176	3.76471	95.7225	2.77457	95.805	2.72109
47	87.6106	8.21745	94.5093	4.32243	95.6818	3.06818	95.3829	3.26577
48	86.4322	9.92462	95.5711	2.91375	95.2915	2.9148	96.6292	2.13483
49	83.27	11.9138	93.9252	4.20561	95.1192	2.83768	95.6965	2.49151
50	84.2569	11.2091	94.4637	4.26759	95.4955	2.7027	95.8797	2.22717

## Sheet: F
Supplemental Table S6. In silico assessment of MELT accuracy and features.
(F) Detection of 3' transductions at various sequence coverages
Test	7.5x	15x	30x	60x
1	0.752941	0.846154	0.894737	0.957895
2	0.732558	0.835052	0.886598	0.979592
3	0.741573	0.88172	0.904255	0.946809
4	0.730337	0.84375	0.876289	0.939394
5	0.719512	0.835165	0.88172	0.957447
6	0.876404	0.956522	0.967391	0.967742
7	0.706522	0.838384	0.939394	0.939394
8	0.785714	0.846154	0.904255	0.926316
9	0.764706	0.891304	0.915789	0.938144
10	0.741573	0.854167	0.917526	0.938776

## Sheet: G
Supplemental Table S6. In silico assessment of MELT accuracy and features.
(G) Detection of 5' inversions at various sequence coverages
All 5' Inversions						5' Inversion in L1 5'UTR (bp 1 to 590)
Test	7.5x	15x	30x	60x		Test	7.5x	15x	30x	60x
1	0.6	0.6	0.8	0.8		1	0.769231	0.808989	0.831579	0.824742
2	0.75	0.8	0.8	0.8		2	0.7	0.780488	0.811111	0.802198
3	0.5	1	1	1		3	0.690141	0.7375	0.777778	0.777778
4	0	1	1	1		4	0.697368	0.811111	0.826087	0.831579
5	0.3	0.454545	0.545455	0.727273		5	0.671429	0.772727	0.778947	0.810526
6	0.6	0.5	0.666667	0.666667		6	0.657143	0.806818	0.836957	0.854167
7	0.625	0.625	0.875	0.875		7	0.643836	0.710843	0.769231	0.797753
8	0.8	1	0.8	1		8	0.575342	0.793103	0.820225	0.847826
9	0.5	0.833333	0.833333	1		9	0.56338	0.694118	0.741176	0.775281
10	0.5	0.875	0.857143	0.875		10	0.623188	0.752941	0.78022	0.793478
11	0.3	0.4	0.6	0.7
12	0.333333	0.333333	0.666667	0.666667
13	0.5	0.625	0.75	0.875
14	0.666667	1	1	1
15	1	1	1	1
16	0.75	0.75	1	1
17	0.25	0.5	0.75	0.75
18	0.4	0.6	0.6	0.8
19	0.2	0.4	1	1
20	0.571429	0.75	0.75	0.875
21	0.111111	0.555556	0.888889	0.888889
22	0.375	0.6	0.7	0.7
23	0.333333	1	1	1
24	0.5	0.666667	0.5	0.5
25	0.428571	0.714286	0.857143	0.857143
26	0.6	1	1	1
27	0.428571	0.428571	0.714286	0.857143
28	0.625	0.75	0.777778	0.777778
29	0.222222	0.555556	0.666667	1
30	0.6	0.8	0.8	0.8
31	0.75	0.75	0.75	1
32	0.4	0.333333	1	1
33	0.285714	0.625	0.625	0.875
34	0.222222	0.6	0.909091	1
35	0.5	0.75	0.75	0.875
36	0	0.5	1	1
37	#N/A	#N/A	#N/A	#N/A
38	0.5	0.8	1	1
39	0.666667	0.666667	0.777778	0.888889
40	0.444444	0.8	1	1
41	0.714286	1	1	1
42	0.5	0.833333	1	1
43	0.2	0.4	0.6	0.6
44	0.5	0.75	0.875	0.875
45	0	0	0.6	0.6
46	0.714286	0.571429	0.714286	1
47	0.4	0.666667	0.666667	0.833333
48	0.2	0.6	1	0.833333
49	0.5	0.75	0.75	0.75
50	0.7	0.7	0.8	0.8

## Sheet: H
Supplemental Table S6. In silico assessment of MELT accuracy and features.
(H) Assessment of MEI deletion calls at various sequence coverages
Test	Alu				L1
	7.5x	15x	30x	60x	7.5x	15x	30x	60x
1	0.24	0.56	0.88	0.93	0.34	0.7	0.9	0.96
2	0.25	0.57	0.85	0.93	0.44	0.7	0.96	1
3	0.24	0.58	0.86	0.94	0.28	0.58	0.88	0.94
4	0.25	0.58	0.85	0.95	0.3	0.49	0.77	0.89
5	0.28	0.58	0.86	0.95	0.32	0.66	0.92	1
6	0.28	0.59	0.87	0.95	0.35	0.6	0.85	0.92
7	0.28	0.59	0.89	0.94	0.28	0.64	0.92	0.96
8	0.28	0.63	0.89	0.93	0.2	0.59	0.86	0.9
9	0.24	0.52	0.85	0.94	0.32	0.52	0.86	0.96
10	0.26	0.6	0.89	0.95	0.2	0.53	0.88	0.92
11	0.28	0.61	0.87	0.95	0.38	0.62	0.87	0.89
12	0.24	0.55	0.86	0.94	0.24	0.52	0.82	0.92
13	0.25	0.59	0.89	0.95	0.35	0.63	0.94	0.98
14	0.28	0.6	0.9	0.97	0.3	0.58	0.82	0.94
15	0.24	0.6	0.89	0.95	0.33	0.57	0.78	0.86
16	0.23	0.57	0.85	0.94	0.28	0.62	0.92	0.98
17	0.24	0.56	0.86	0.95	0.34	0.68	0.9	0.96
18	0.26	0.52	0.88	0.95	0.26	0.6	0.82	0.94
19	0.22	0.53	0.86	0.93	0.3	0.64	0.86	0.92
20	0.26	0.6	0.88	0.95	0.29	0.57	0.8	0.94
21	0.23	0.54	0.86	0.94	0.38	0.58	0.84	0.92
22	0.27	0.61	0.87	0.95	0.27	0.44	0.77	0.9
23	0.28	0.58	0.87	0.94	0.22	0.56	0.88	0.98
24	0.22	0.58	0.84	0.93	0.34	0.56	0.88	0.92
25	0.27	0.59	0.86	0.95	0.24	0.65	0.9	0.94

## Sheet: Legend
Supplemental Table S6. In silico assessment of MELT accuracy and features.
(A) Tranche distribution data related to Supplemental Fig. S4A.
For each MEI type (Alu, L1, SVA), the tranche (1 row for each tranche) distribution (as described in
Supplemental Table S2) is indicated at four different simulated coverages (7.5x, 15x, 30x, 60x). Each
number represents percent of sites in that given tranch for each MEI at each coverage, independent of
any other column (i.e. each column adds up to ~100%).
(B) Breakpoint data for Supplemental Fig. S4B. Each column lists the distance from the
correct position for all sites ascertained at each coverage level.
For each MEI type (Alu, L1, SVA) the breakpoint accuracy results are indicated from in silico testing at
four different simulated coverages (7.5x, 15x, 30x, 60x). Each column is a distance from the true
breakpoint and used to generate the histograms shown in Supplemental Fig. S4B.
(C) Statistics used to plot the length accuracy shown in Supplemental Fig. S4C.
Length accuracy results for in in silico testing for Alu, L1, SVA MEIs at four different simulated
coverages (7.5x, 15x, 30x, 60x). Each coverage and MEI type has the mean distance from the true
length of the site, the standard deviation, and total number of sites measured for this analysis.
(D) Percent properly determined strand accuracy for each test shown in Supplemental Fig. S4D.
In silico assessed recovery of strand information at four different simulated coverages (7.5x, 15x,
30x, 60x). For each experiment (Test column), shown is the percent of sites with accurate recovery
of the expected strand.
(E) Alu subfamily recovery data related to Supplemental Fig. S4E.
In silico assessed recovery of Alu subfamily information at four different simulated coverages (7.5x,
15x, 30x, 60x). For each coverage, there are two columns, each representing the percentage of
sites where exact subfamily was recovered (subfamily) or where family lineage (family) was
recovered.
(F) 3’ transduction detection data for Supplemental Fig. S4F
In silico assessed recovery of L1 sites with 3' Transductions at four different simulated coverages
(7.5x, 15x, 30x, 60x). Each column represents the percent of L1 sites with 3' transductions that
were properly recovered at each coverage level.
(G) 5’ inversion detection data for Supplemental Fig. S4G,H.
In silico assessed recovery of L1 sites with 5' inversions at four different simulated coverages
(7.5x, 15x, 30x, 60x). Each column represents the percent of L1 sites with 5' inversions that
were properly recovered at each coverage level. Also includes seperate control experiments
for detection of 5' Inversion in the 5' UTR of L1 (<=590bp)
(H) Percent sites properly ascertained by the MELT-DEL caller shown in Supplemental Fig. S5.
In silico assessed recovery of deletion mobile elment sites at four different simulated coverages
(7.5x, 15x, 30x, 60x). For each experiment (Test column), shown is the percent of sites that
were recovered in each test (i.e. sensitivity).
