# Supplementary material for: The Mobile Element Locator Tool (MELT): population-scale mobile element discovery and biology
Source: Genome Res. 2017 Nov;27(11):1916–29. doi: 10.1101/gr.218032.116 (PMC5668948; doi:10.1101/gr.218032.116)
Supplement: Supplemental Material [file supp_gr.218032.116_Supplemental_Table_S7.xlsx]

## Sheet: A
Supplemental Table S7. PCR assessment of MEIs.
(A) Coordinates, primers, PASS/FAIL status, and gDNA samples for Alu, L1, and SVA sites selected for PCR validation.
Chromosome	Position	MEI Type	AF	Strand	A Primer	D Primer	Expected Size	Pass?	Sample Tested	Notes
20	50465149	Alu	0.00431034	+	AACATCTCATGTCATCTCCAGGGC	TGACCCAATAACGGATCCAGAAGA	646	PASS	HG03642
10	129553760	Alu	0.00813517	+	CTTGTCAAGGGACTTGCAGAGAGG	TCTCCCAGTCTTTGTTGGAATTGG	545	PASS	HG02922
2	162618800	Alu	0.00234842	+	CCTGACCCTGGGCTATTTCATTTC	TATCAGCTCGGAGACTGCTGTGTT	589	PASS	NA18525
5	50990617	Alu	0.00948167	+	CTCATAAGAGTTGCTGTGGGGACAA	GGAGCCAATCAGGATAGGTTTCCA	1336	PASS	HG01879
1	56671110	Alu	0.00394355	+	TCTTTGAAACAATCCCATGCCACT	GTGGGGAGGAAAGAGTGCTAGGAG	726	PASS	HG03052
4	118719566	Alu	0.00519534	+	TAGCATGGCCTTCCTCTCCTACAG	GATTCCTGGGTTTCCATTCCTTACC	655	PASS	HG01879
18	44720612	Alu	0.00679852	-	AGCCTTAGGTTCAAATCCCAGGTG	CCCTTCTCTGAAATGCTAAAGGCAG	300	PASS	HG02922
3	116774540	Alu	0.00515677	-	TCCAAACATCCAGGCATCTAGCTC	AGGGCAAAAGTAGCCACACAAAGG	592	PASS	HG02568
4	80883493	Alu	0.00654837	+	AATGCCTATATGGGGAGGGGAGAC	ATCTTTGGCCTTTACCTTTCAGGG	516	PASS	HG00268
2	89003456	Alu	0.000206697	-	GTGACATTTTCCCCACTGTCTTGG	CTTCTTCATTCTCTGCTTGCTGCC	736	PASS	HG03006
9	92528259	Alu	0.0078125	-	CCCAAATACTCACAAGCAGCACG	GGCCAGCACAACACAGAGACTAAAA	668	PASS	NA19240
1	85293152	Alu	0.00536082	+	CATTTTCCCCTTCTCTCCAAGAGC	GAATGGTCAGCAGTGCCTGTTAGG	386	PASS	HG01879
2	31066163	Alu	0.00270158	+	GAGATCTCAGTTGCTCTTTGTGTGC	TCATATGTGGATAGCCAGGATCATTT	343	PASS	HG02922
16	59649799	Alu	0.00453421	+	GGAGGCAAATCCGTACATCACAGT	GCGATAAACCAAGACACCAGGTTG	582	PASS	HG02922
14	101487175	Alu	0.00906096	-	ACCATGTTCATCTGACCCATGCTC	CTGAACATCTGTGAGGTGCTGGAG	335	PASS	HG03052
16	87427315	Alu	0.00534539	-	GATGCGAAGTGATTATTTCCCGCT	CTCAGGGCCACTTTTAGGTTCCAG	813	PASS	HG01879
10	71550529	Alu	0.00843621	-	TAACTGTGGTGACTTGGAGGTGGG	AATTCTTCCAAGATGGCAGGTGCT	624	PASS	HG03052
1	222296156	Alu	0.0166461	-	AACAAGTTCTTCCAGGACAAGGGC	GGGAGAAACTTGATTGGTTTGGCT	539	PASS	HG00096
4	33632746	Alu	0.0196119	-	CTTTCTGGCTGATGGCTAGAGGCT	GCAAAGTTGCATGGCAAAAGGATA	550	PASS	HG02568
10	128586676	Alu	0.0197287	+	AGATCAAGTTGTGGGCAGATCGAG	GCTGCCTACTGTAACTGTGTCCCC	503	PASS	HG01051
9	18446980	Alu	0.0106918	-	TGAACGTGCAGAAACTGGACCATA	GCACAACATTCAGCTTCAGGGATT	780	PASS	HG03052
1	70106387	Alu	0.0154004	+	GTGAGCACTATGATTGTTCCTGA	TGTCCAAGTTCTCTATCCAGGT	649	PASS	HG03052
13	110735864	Alu	0.0178416	-	AAATCGAGGACAAATGAGAACACTCC	TTGCTGTATCCCATAGCTTTTTGC	858	PASS	HG02922
4	136208558	Alu	0.0256857	-	TTGAAGTGGGCACTTATGCAGCTT	CAAACCCTCTGGGTAATCTAGGCA	405	PASS	NA19017
3	23298159	Alu	0.0375469	+	TGCCTTGTCATATTTGAATACTTGGG	GACCCACACAGAAGAGCTGTGGTT	824	PASS	HG01051
6	91133173	Alu	0.0474227	+	TTCAAGTGTAGGGGATAGGGCTGC	GCTCATCCTTTGCTATTCCTTCGG	302	PASS	HG01879
2	69744669	Alu	0.05886	-	GCCCTCAAATGAAGAGGGAATGTT	TTGTCCCTTGGAATTTTTGGCATT	433	PASS	NA19648
10	73225651	Alu	0.00268484	+	CTCCTCGAGTGGCCTGGGTAATAG	ATGTGGGCAGAGGCACACTAACAT	804	PASS	NA19017
12	102855260	Alu	0.00684932	+	CAGGTTTTGAGACCCAGGGGATTA	TCAAGTTGGTGGAACCTTTCCTCA	764	PASS	NA12878
12	128827129	Alu	0.00310559	+	CTGGCCACGCTTCTTTGAAATTGT	TGGCAGCATCTGTCACCCTAAACT	764	FAIL	HG01500
11	65523523	Alu	0.0244021	-	ATCAGGCCTGCAGCTTTCTGTTT	CATCCCGGCTAAAACGGTGAAA	803	FAIL	HG00096
X	12793052	L1	0.000444642	-	TGGCAAAGCATCTAGAATGCAAAGA	AAAAGGTTTGGGGCTATGGAAAGA	378	PASS	HG00759	Used A+D
8	2784027	L1	0.000207125	+	CCTATTGTTGACGTCCTCCTTCCC	GCAGCAAGAAGTGGCAAGTGCTAA	412	PASS	HG03052	Used A+D
10	73389959	L1	0.000206186	+	ACAAAGCTTCATTTGTGGGGGAC	GCAAATCCCATTGACTCTCCCTTC	644	PASS	NA19625	Used A+D
14	53958718	L1	0.000422833	+	#N/A	GAATTGGGGTCTGGATTAGGCAC	679	PASS	HG01565
13	62077145	L1	0.0058309	-	#N/A	CCACCTATTGTAGATGCAAACCCG	305	PASS	HG03052
5	88350570	L1	0.0190856	-	#N/A	AGCCTTGCTTCTTGGGAAATGTGT	812	PASS	HG02922
14	86336839	L1	0.00781893	-	#N/A	CAGCCTGGGTGACATAACAACACC	792	PASS	HG00268
3	103699868	L1	0.00235043	-	#N/A	TCTGTACACCGTTTTGGCCTGTTC	436	PASS	HG02568
1	210113657	L1	0.000208333	-	#N/A	CCATGTCACCTGATGGCATTTTACT	877	PASS	HG00759
2	205077424	L1	0.00437136	-	#N/A	TTTGGTGGTTGTCCTAGGGATTACA	860	PASS	HG02568
2	199794441	L1	0.00681818	+	#N/A	GAAATCGATTAGGATTTTCGGGCA	813	PASS	NA19017
4	54368303	L1	0.00452861	-	#N/A	AAGGATGGATAAACCATGCCAGGA	570	PASS	NA18525
6	78515577	L1	0.000647668	+	#N/A	ACTGAGAGACACTTCAGCCTCCCA	848	PASS	HG01051
8	13898766	L1	0.00849565	+	#N/A	TGTTGCAAGTGCAATGGTGTGAT	760	PASS	HG02568
2	13353189	L1	0.000616523	-	#N/A	CAAGGTGTCCTTGTACCTGCAACA	749	PASS	HG00268
18	63161466	L1	0.00211238	+	#N/A	TGGCAAAGCTATCCGTAAAGCAAGT	492	PASS	NA19017
1	152458413	L1	0.00616016	-	#N/A	TCGACACCTCAAGAATTGCTTCGT	700	PASS	HG02568
10	79007271	L1	0.00165085	-	#N/A	GCTTCCCTTTCAGAGACAAGAGCC	739	PASS	HG01879
15	22484169	L1	0.000408497	-	#N/A	CACAGCTCACTGGTGACTCTGGAA	732	PASS	NA18525
4	97987025	L1	0.00102923	+	#N/A	TATGGTCCCTAATTGCCATCATGC	456	PASS	HG03052
6	126623598	L1	0.00596462	-	#N/A	TTAGGAAGGAAGTGAGGGACCAGA	335	PASS	HG01051
2	107997825	L1	0.00780929	-	#N/A	ATCATGTGACTCCCTCGTTTGGAC	435	PASS	HG01879
X	32379285	L1	0.0147256	-	#N/A	GGCAACAGAGAGAGTCTCCACCAC	817	PASS	HG01051
12	40147193	L1	0.0151957	-	#N/A	TGTTGAAAATGGCTTCCTGAGCTG	624	PASS	HG01879
8	140145247	L1	0.0125721	-	#N/A	TGCCCGGAATAAAGTTCGTAAACC	612	PASS	HG03052
3	20090533	L1	0.0219298	-	#N/A	ACGGGGAATTAGAACAGGCACATT	738	PASS	HG03006
11	43356955	L1	0.0327629	+	#N/A	CGTTGCCTCCCACCAGTTTATTTT	337	PASS	NA12878
16	32593537	L1	0.00797546	-	#N/A	AAGCGAAAAAGAGAAAATCCCGAG	521	PASS	HG01595
6	72038758	L1	0.00739523	-	#N/A	AAAGCAATTCATGATCCCAGCCTT	611	PASS	NA18939
6	159876310	L1	0.000824402	+	#N/A	ACAAAGAGTGCCACAGAGGACCAC	523	FAIL	HG01051
22	29065468	L1	0.00628667	-	#N/A	GGGGCCACATGTCTAATAAAGGTGA	534	FAIL	NA19648
5	37530768	SVA	0.0199245	+	#N/A	ACCTCTGGGATACAGCAACAGTGG	740	PASS	HG03052	Used SVA_2
20	46218700	SVA	0.0132548	-	#N/A	CTGCACCTGGCTGACTTGAACTTT	739	PASS	HG01500	Used SVA_2
X	26922374	SVA	0.0700576	+	#N/A	TTCAAAGGGCATAACATCGCATTT	528	PASS	NA12878	Used SVA_2
3	33922276	SVA	0.00531915	+	#N/A	TGTTTCCAGTGGGTTCATTTCCAC	777	PASS	HG01879	Used SVA_2
20	44339369	SVA	0.00776867	+	#N/A	AATCATGACGTGTGATGCTTCCAG	770	PASS	HG02922
1	28701078	SVA	0.00184805	-	#N/A	GTTTTGGTTCCCCCTAATCTTTGC	584	PASS	HG02922
12	125842892	SVA	0.0071249	-	#N/A	CCATGCTAAGAGCCATGAAGGAAA	466	PASS	HG02568
6	112243261	SVA	0.0010469	+	#N/A	TTGCTTATCTTGATTCCCACTTGC	647	PASS	HG01595
12	49526219	SVA	0.000413394	+	#N/A	AGGTTCAGATGGGTGGAGACACAC	678	PASS	HG02922
15	58387583	SVA	0.00268484	+	#N/A	ACAGCAAGCCAAAACAAAGTCCAA	731	PASS	HG03006
22	44749704	SVA	0.00724038	-	#N/A	TCTGGTAATGGCAGAAGCACACAG	736	PASS	HG01500
20	17302395	SVA	0.000828844	+	#N/A	CAACTTCGAAATCACCCAGCTCAG	879	PASS	HG03742
8	81777102	SVA	0.00123305	+	#N/A	CTCCACTCACTTGTTGCATGGCTA	716	PASS	HG00419
7	37146242	SVA	0.00906843	+	#N/A	TCAAAATATGGACCCTGGACTTGC	850	PASS	NA19625
17	17995477	SVA	0.0150206	-	#N/A	ACTAATGGCAGGGTGGAGTTCTGA	374	PASS	HG00759
10	50932284	SVA	0.0188989	+	#N/A	GCTATGATTGTGACACTGCCCTCC	595	PASS	HG03052
6	33795295	SVA	0.0180847	-	#N/A	AGTCACCTTCGCCTCACCTCTTTC	541	PASS	NA19017
X	122922879	SVA	0.0167421	-	#N/A	GAATTGCTTGAACCCAGCGGAT	702	PASS	HG01879
19	57553914	SVA	0.0158894	-	#N/A	CCTCGAGCTCTCCCACCTCTTT	500	PASS	HG02922
13	42223739	SVA	0.0295483	-	#N/A	GATGGGGGACACTCTGTCTCAACA	766	PASS	HG01500
19	18835612	SVA	0.0390887	-	#N/A	ATGAGCTGGCTCTAGGATCAAGGG	741	PASS	HG00759
14	78045153	SVA	0.0477083	+	#N/A	CTGGAATCGGCCAATCTGTAGTGT	560	PASS	HG01565
15	70839579	SVA	0.114322	-	#N/A	CCTCCACCTCACCAGTAGCATTGA	532	PASS	NA12878
5	180509755	SVA	0.146737	-	#N/A	TCCAATCAAAATCCCAGCAGGTTA	618	PASS	HG00759
5	177944580	SVA	0.0546908	-	#N/A	AAGGGCTTAGAATGCTCCCCTGAG	534	PASS	HG03052
4	164757573	SVA	0.0234838	+	#N/A	AATGGCGCACTTGGTATCACTGTT	758	FAIL	HG03642
2	157306380	SVA	0.203956	-	#N/A	TTTCACCTGCCAAGAAGCAACTGT	641	FAIL	HG00096
11	76229244	SVA	0.00104515	+	#N/A	TGCGCGCACACACACACTTTATAC	615	FAIL	HG01583

## Sheet: B
Supplemental Table S7. PCR assessment of MEIs.
(B) Internal primers used for amplification of L1 or SVA MEIs.
Target MEI	Sequence	Source
L1	GGGAGATATACCTAATGCTAGATGACACA	Scott et al, 2016
SVA	TCTGCCTAGGAAAACCAGAGAC	Sudmant et al, 2015
SVA_2	CTGACCTTCCCTCCACTATTGTCC	Bennett et al, 2004

## Sheet: Legend
Supplemental Table S7. PCR assessment of MEIs.
(A) Coordinates, primers, PASS/FAIL status, and gDNA samples for Alu, L1, and SVA
sites selected for PCR validation (Supplemental Fig. S7; also see Supplemental Methods above).
Column	Description
Chromosome	Chromosome in Hg19 coordinates
Position	Position in Hg19 coordinates
MEI Type	MEI type (either LINE-1, Alu, or SVA).
AF	Ascertained allele frequency of the site in the the 1KGP data generated by MELT 2.0.
Strand	Strand of the insertion (either '-' or '+').
A Primer	Sequence of the 'A' primer used for PCR amplification of MEIs (if used). #N/A if a C+D approach was used instead.
D Primer	Sequence of the 'D' primer used for PCR amplication of MEIs.
Expected Size	Expected size of the empty site.
Pass?	Was the MEI site confirmed with PCR analysis? Either PASS or FAIL.
Sample Tested	ID of the 1KGP genome used for PCR amplification.
Notes	Was alternate method used to confirm MEI presence?
(B) Internal primers used for amplification of L1 or SVA sites.
( 'C' primer sequences used in C+D PCR amplication approach; Supplemental Fig. S7).
Column	Description
Target MEI	Type of MEI for which this primer was used. Either LINE-1 or SVA.
Sequence	Sequence of the 'C' primer.
Source	Citation of the paper from which this primer was obtained.
