# Supplementary material for: The Mobile Element Locator Tool (MELT): population-scale mobile element discovery and biology
Source: Genome Res. 2017 Nov;27(11):1916–29. doi: 10.1101/gr.218032.116 (PMC5668948; doi:10.1101/gr.218032.116)
Supplement: Supplemental Material [file supp_gr.218032.116_Supplemental_Table_S8.xlsx]

## Sheet: A
Supplemental Table S8. Analysis of Alu subfamilies.
(A) Analysis of known Alu subfamilies in Figure 2A.
Subfamily	Total Sites	Count All	Count Shared	Count Specific	Prop All	Prop Shared	Prop Specific
Y	46	9	7	30	0.195652	0.152174	0.652174
Ya5	737	184	162	391	0.249661	0.21981	0.530529
Yb8	317	65	79	173	0.205047	0.249211	0.545741
Yc1	202	46	44	112	0.227723	0.217822	0.554455
Yg6	18	2	4	12	0.111111	0.222222	0.666667
Yk13	9	3	2	4	0.333333	0.222222	0.444444

## Sheet: B
Supplemental Table S8. Analysis of Alu subfamilies.
(B) Analysis of novel Alu subfamilies in Figures 2B,C.
ID	Total Sites	Count All	Count Shared	Count Specific	Prop All	Prop Shared	Prop Specific
1	7	1	3	3	0.142857	0.428571	0.428571
2	5	2	1	2	0.4	0.2	0.4
3	5	0	2	3	0	0.4	0.6
4	6	3	2	1	0.5	0.333333	0.166667
5	30	6	4	20	0.2	0.133333	0.666667
6	7	0	3	4	0	0.428571	0.571429
7	5	2	1	2	0.4	0.2	0.4
8	14	3	4	7	0.214286	0.285714	0.5
9	53	7	16	30	0.132075	0.301887	0.566038
10	5	1	1	3	0.2	0.2	0.6
11	28	9	7	12	0.321429	0.25	0.428571
12	5	3	0	2	0.6	0	0.4
13	21	5	4	12	0.238095	0.190476	0.571429
14	9	0	0	9	0	0	1
15	5	2	0	3	0.4	0	0.6
16	8	1	2	5	0.125	0.25	0.625
17	8	1	2	5	0.125	0.25	0.625
18	5	1	3	1	0.2	0.6	0.2
19	5	2	0	3	0.4	0	0.6
21	7	3	2	2	0.428571	0.285714	0.285714
22	29	4	10	15	0.137931	0.344828	0.517241
23	5	0	3	2	0	0.6	0.4
24	9	1	5	3	0.111111	0.555556	0.333333
25	32	7	12	13	0.21875	0.375	0.40625
26	6	1	1	4	0.166667	0.166667	0.666667
27	20	2	2	16	0.1	0.1	0.8
28	5	0	1	4	0	0.2	0.8
29	21	3	5	13	0.142857	0.238095	0.619048
30	17	6	4	7	0.352941	0.235294	0.411765
31	18	3	5	10	0.166667	0.277778	0.555556
32	67	20	20	27	0.298507	0.298507	0.402985
33	13	0	2	11	0	0.153846	0.846154
34	27	5	8	14	0.185185	0.296296	0.518519
35	6	1	2	3	0.166667	0.333333	0.5
36	5	1	2	2	0.2	0.4	0.4
37	6	1	0	5	0.166667	0	0.833333
38	9	2	2	5	0.222222	0.222222	0.555556
39	5	1	0	4	0.2	0	0.8
40	6	2	2	2	0.333333	0.333333	0.333333
41	15	4	7	4	0.266667	0.466667	0.266667
42	8	0	2	6	0	0.25	0.75
43	35	10	10	15	0.285714	0.285714	0.428571
44	6	2	4	0	0.333333	0.666667	0
45	17	3	4	10	0.176471	0.235294	0.588235
46	5	1	2	2	0.2	0.4	0.4
47	5	2	0	3	0.4	0	0.6
48	100	16	24	60	0.16	0.24	0.6
49	11	1	2	8	0.0909091	0.181818	0.727273
50	10	0	1	9	0	0.1	0.9
51	7	0	1	6	0	0.142857	0.857143
52	6	0	2	4	0	0.333333	0.666667
53	9	4	0	5	0.444444	0	0.555556
54	11	3	3	5	0.272727	0.272727	0.454545
55	8	3	0	5	0.375	0	0.625
56	62	13	14	35	0.209677	0.225806	0.564516
57	11	1	3	7	0.0909091	0.272727	0.636364
58	112	18	21	73	0.160714	0.1875	0.651786
59	11	4	1	6	0.363636	0.0909091	0.545455
60	104	21	23	60	0.201923	0.221154	0.576923
62	6	0	1	5	0	0.166667	0.833333
63	25	8	2	15	0.32	0.08	0.6
64	6	1	1	4	0.166667	0.166667	0.666667
65	12	0	5	7	0	0.416667	0.583333
66	7	3	0	4	0.428571	0	0.571429
67	10	1	2	7	0.1	0.2	0.7
68	8	3	1	4	0.375	0.125	0.5
70	5	0	2	3	0	0.4	0.6
71	6	1	0	5	0.166667	0	0.833333
72	18	5	3	10	0.277778	0.166667	0.555556
73	7	1	3	3	0.142857	0.428571	0.428571
74	9	2	2	5	0.222222	0.222222	0.555556
75	8	3	2	3	0.375	0.25	0.375
76	5	0	2	3	0	0.4	0.6
77	5	1	0	4	0.2	0	0.8
78	11	1	2	8	0.0909091	0.181818	0.727273
79	9	0	3	6	0	0.333333	0.666667
80	9	1	3	5	0.111111	0.333333	0.555556
81	50	9	11	30	0.18	0.22	0.6
82	17	3	3	11	0.176471	0.176471	0.647059
83	5	2	0	3	0.4	0	0.6	Not included in Figure 2
84	11	1	3	7	0.0909091	0.272727	0.636364	Not included in Figure 2

## Sheet: C
Supplemental Table S8. Analysis of Alu subfamilies.
(C) Novel Alu subfamilies in Figure 2C.
ID	Base Subfamily	change1	change2	change3	Suggested Family Name	Total Sites	AFR Allele Count	EUR Allele Count	EAS Allele Count	SAS Allele Count	Expected Allele Count	ChiSquare P	Additional Tab
1	AluY	a95g			AluYl1	7	360	72	128	8	142	2.11718e-107
2	AluY	g75a	g212a		AluYm1	5	116	85	128	84	103.25	0.00249802
3	AluYa1_1	a120c	c64t		AluYa1_1a2	5	61	9	59	0	32.25	7.46641e-21
4	AluYa1_1	d281	d85-94	a132g	AluYa1_1b3	6	802	744	655	939	785	9.92579e-12
5	AluYa1_1	g208a	c236t		AluYa1_1c2	30	974	1161	1228	1336	1174.75	9.54687e-13
6	AluYa1_2	c96a	c138t	g145a	AluYa1_2a3	7	70	72	33	29	51	6.45184e-07
7	AluYa1_2	g148a			AluYa1_2b1	5	1075	912	1204	895	1021.5	1.47425e-13
8	AluYa3_3	g208a	c57t		AluYa3_3a2	14	835	425	393	419	518	5.02628e-56
9	AluYa3_4	c98a			AluYa3_4a1	53	1827	1633	1481	1472	1603.25	3.23153e-11
10	AluYa3_4	c98a	c218t	a127g	AluYa3_4a1a2	5	145	267	572	152	284	3.02219e-91	G
11	AluYa4_2	t111c			AluYa4_2a1	28	1696	1374	2053	1683	1701.5	2.9383e-29
12	AluYa4_2	c23t			AluYa4_2b1	5	876	989	1254	715	958.5	1.09762e-34
13	AluYa4_2	a188g	c98t		AluYa4_2c2	21	848	521	606	908	720.75	3.58835e-31
14	AluYa4_3	g148a			AluYa4_3a1	9	45	0	0	33	19.5	1.33043e-17	I
15	AluYa4_3	c83a			AluYa4_3b1	5	279	186	242	243	237.5	0.000325791
16	AluYa4_4	g186a			AluYa4_4a1	8	202	153	234	141	182.5	9.26694e-07
17	AluYa4_4	g269c			AluYa4_4b1	8	106	78	120	89	98.25	0.0149607
18	AluYa4_5	t244a	a252c		AluYa4_5b2	5	198	126	162	3	122.25	5.55032e-38
19	AluYa4_5	g152c			AluYa4_5c1	5	34	214	490	509	311.75	4.2848e-109
21	AluYa4_5	c236t	t219a		AluYa4a1a1	7	329	719	737	750	633.75	2.85366e-42
22	AluYa4_5	c236t	g199a		AluYa4a1b1	29	400	379	452	428	414.75	0.0608608
23	AluYa5a1	g211c			AluYa5a1a1	5	17	16	9	51	23.25	6.26806e-10
24	AluYa5a1	a71g			AluYa5a1b1	9	110	134	161	91	124	5.89955e-05
25	AluYa5b1	i119a			AluYa5b1a1	32	2094	1521	1664	1860	1784.75	2.24854e-22
26	AluYa5b1	i119a	t200g		AluYa5b1a2	6	162	173	160	202	174.25	0.091462
27	AluYa5	c108t			AluYa5c1	20	408	196	119	441	291	1.96594e-55	D
28	AluYa5	a28g			AluYa5d1	5	32	16	19	0	16.75	8.6244e-07
29	AluYa5	i94aa			AluYa5e1	21	530	170	225	168	273.25	4.47801e-71
30	AluYa5	i94aa	c98t		AluYa5e2	17	844	659	720	697	730	8.10697e-06
31	AluYa5	a161c			AluYa5f1	18	400	810	650	916	694	6.18177e-47
32	AluYa5	a188g			AluYa5g1	67	4616	3491	4126	4833	4266.5	8.67161e-54
33	AluYa5	a188g	g190a		AluYa5g1a1	13	464	0	2	0	116.5	2.2915e-299	F
34	AluYa5	a188g	c98t		AluYa5g1b1	27	984	819	724	812	834.75	3.47148e-09
35	AluYa5	t225c			AluYa5h1	6	408	29	117	6	140	1.41471e-158
36	AluYa5	c248g			AluYa5i1	5	142	138	151	160	147.75	0.581943
37	AluYa5	a95t			AluYa5j1	6	187	10	10	9	54	2.38766e-94
38	AluYa5	g259a			AluYa5k1	9	409	343	373	262	346.75	2.06266e-07
39	AluYa5	c88t	c260t		AluYa5l2	5	30	222	208	262	180.5	6.39205e-38
40	AluYa5	g258a			AluYam1	6	603	410	520	612	536.25	1.1684e-10
41	AluYa5	i94a			AluYa5n1	15	576	947	874	1028	856.25	2.54045e-29
42	AluYa5	i94a	g224a		AluYa5n2	8	249	51	3	25	82	5.10751e-101
43	AluYa5	g90a			AluYa5o1	35	1992	1914	2170	1661	1934.25	6.11227e-15
44	AluYa5	g90a	a188g		AluYa5o2	6	270	274	326	593	365.75	1.01901e-41	E
45	AluYa5	a119g			AluYa5p1	17	648	206	288	256	349.5	1.73519e-75
46	AluYa5	g186t			AluYa5q1	5	178	61	4	70	78.25	1.35383e-43
47	AluYa5	t101c			AluYa5r1	5	288	470	641	196	398.75	2.23535e-63
48	AluYa5	c98t			AluYa5s1	100	3627	1927	2383	1879	2454	2.1255e-175
49	AluYa5	c98t	t86c		AluYa5s2	11	188	171	116	74	137.25	7.50719e-13
50	AluYa5	t133c	t219c	g221c	AluYa5t3	10	110	36	1	7	38.5	4.48896e-42
51	AluYa5	c213a			AluYa5u1	7	16	18	10	15	14.75	0.501891
52	AluYa5	t220g			AluYa5v1	6	121	20	3	0	36	4.09287e-59
53	AluYa5	a123c	c166t		AluYa5w2	9	258	500	582	405	436.25	1.17212e-28
54	AluYb5	c248g	a252g		AluYb5a2	11	1001	871	886	1331	1022.25	6.62127e-29
55	AluYb5	a252g			AluYb5b1	8	418	585	822	983	702	1.13416e-57	H
56	AluYb6_2	a252g			AluYb6_2a1	62	2045	1937	1891	2091	1991	0.00469233
57	AluYb6_2	a252g	c174g		AluYb6_2a2	11	329	283	147	542	325.25	2.09429e-53
58	AluYb6_2	c248g			AluYb6_2b1	112	3001	2855	3394	3615	3216.25	1.34053e-24
59	AluYb6_2	c248g	i252gcagtcc		AluYb6_2b1a1	11	297	595	839	504	558.75	1.97239e-58
60	AluYb6_2	c248g	a252g		AluYb6_2b1b1	104	4001	3592	4322	4794	4177.25	5.69926e-40
62	AluYb6_2	c248g	c174g	i201t	AluYb6_2b1c1a1	6	30	49	64	0	35.75	8.58384e-14
63	AluYb6_2	c248g	c174g	a252g	AluYb6_2b1c1b1	25	695	1187	1647	1218	1186.75	1.02121e-82
64	AluYb7_2	g253a			AluYb7_2a1	6	796	405	362	341	476	7.5709e-63
65	AluYb7_3	t134c	g214a		AluYb7_3a2	12	176	39	29	63	76.75	1.39036e-38
66	AluYb7_3	c243t	g261a	g207a	AluYb7_3b3	7	587	203	57	143	247.5	1.07317e-143
67	AluYb7_4	a28g	g199t	g237c	AluYb7_4a3	10	315	125	312	183	233.75	5.46969e-25
68	AluYb8	t256g			AluYb8a1	8	98	374	218	446	284	1.16723e-55
70	AluYb8	g253a	g12t		AluYb8b2	5	77	11	5	0	23.25	2.97679e-36
71	AluYb8	c126t			AluYb8c1	6	91	24	94	1	52.5	2.36247e-27
72	AluYb8	i207g			AluYb8d1	18	812	844	691	633	745	1.10099e-08
73	AluYb8	g91a	c150t		AluYb8e2	7	126	43	89	7	66.25	1.87839e-26
74	AluYb8	g55a			AluYb8f1	9	191	314	198	511	303.5	1.48722e-47
75	AluYb8	g72a			AluYb8g1	8	500	561	193	448	425.5	9.76615e-40
76	AluYc1	t200c	g199a		AluYc1a2	5	21	3	16	0	10	1.03193e-06
77	AluYc1	g215a			AluYc1b1	5	214	17	60	33	81	2.41663e-65
78	AluYc1	c92g	g99a		AluYc1c2	11	194	76	36	136	110.5	5.45725e-28
79	AluYc1	a191g			AluYc1d1	9	67	75	59	133	83.5	7.72518e-09
80	AluYc1	c236g			AluYc1e1	9	146	105	86	124	115.25	0.000641672
81	AluYc1	c87t			AluYc1f1	50	1619	1131	1112	1267	1282.25	8.59743e-28
82	AluYc1	i119aa	a191g		AluYc1g2	17	558	759	762	996	768.75	6.03946e-27
83	AluYf1	t124a	c156t	g99a	AluYf1a3	5	522	398	537	624	520.25	8.1393e-11	Not included in Figure 2
84	AluYh7	g152c			AluYh1a1	11	116	54	68	12	62.5	5.23047e-19	Not included in Figure 2

## Sheet: D
Supplemental Table S8. Analysis of Alu subfamilies.
(D) Family D, Figure 2D.
Chromosome	Position	Allele Frequency	AFR Allele Count	EUR Allele Count	EAS Allele Count	SAS Allele Count
1	240990120	0.0115	45	0	0	0
2	56971696	0.0038	15	0	0	0
2	222677220	0.0069	27	0	0	0
2	227946470	0.005	20	0	0	0
3	37750134	0.0133	12	8	16	16
3	122445747	0.1988	123	167	85	405
3	194362612	0.0099	39	0	0	0
4	13277659	0.0043	17	0	0	0
5	99365710	0.001	0	0	4	0
7	123282994	0.002	8	0	0	0
9	18690343	0.0025	10	0	0	0
9	82751046	0.0031	12	0	0	0
10	30107767	0.0036	0	14	0	0
10	90247452	0.0071	28	0	0	0
10	92338021	0.0036	14	0	0	0
14	20584420	0.0008	0	0	1	2
19	19454356	0.0051	0	7	13	0
20	11885954	0.0087	34	0	0	0
21	26733901	0.0046	0	0	0	18
X	134776925	0.001	4	0	0	0

## Sheet: E
Supplemental Table S8. Analysis of Alu subfamilies.
(E) Family E, Figure 2E.
Chromosome	Position	Allele Frequency	AFR Allele Count	EUR Allele Count	EAS Allele Count	SAS Allele Count
3	172910715	0.01249	42	4	3	0
4	35661271	0.01478	53	0	5	0
14	34493354	0.14755	75	217	190	97
15	79128425	0.07416	0	8	0	283
16	7796451	0.0158	0	11	51	0
20	9572284	0.10805	100	34	77	213

## Sheet: F
Supplemental Table S8. Analysis of Alu subfamilies.
(F) Family F, Figure 2F.
Chromosome	Position	Allele Frequency	AFR Allele Count	EUR Allele Count	EAS Allele Count	SAS Allele Count
3	25455106	0.00178	7	0	0	0
3	39576238	0.00586	23	0	0	0
3	130556643	0.0028	11	0	0	0
4	94229086	0.00357	14	0	0	0
5	95083844	0.00102	4	0	0	0
6	48211219	0.00153	6	0	0	0
6	117193117	0.00153	6	0	0	0
7	9792770	0.00076	3	0	0	0
7	109221898	0.01555	61	0	0	0
13	41901883	0.05352	209	0	1	0
13	72494861	0.00382	15	0	0	0
13	93810884	0.02625	102	0	1	0
14	62104687	0.00076	3	0	0	0

## Sheet: G
Supplemental Table S8. Analysis of Alu subfamilies.
(G) Family G, Figure 2G
Chromosome	Position	Allele Frequency	AFR Allele Count	EUR Allele Count	EAS Allele Count	SAS Allele Count
3	103453396	0.2811	145	266	540	152
12	78911289	0.0036	0	0	14	0
10	73993291	0.0023	0	1	8	0
4	138076283	0.0013	0	0	5	0
8	143080461	0.0013	0	0	5	0

## Sheet: H
Supplemental Table S8. Analysis of Alu subfamilies.
(H) Family H, Figure 2H.
Chromosome	Position	Allele Frequency	AFR Allele Count	EUR Allele Count	EAS Allele Count	SAS Allele Count
4	180363121	0.00127	5	0	0	0
6	34885389	0.00076	0	3	0	0
6	111107864	0.05734	3	33	11	178
10	86602949	0.00331	13	0	0	0
11	26601650	0.12411	101	67	87	232
11	58181128	0.00382	0	0	0	15
12	64480170	0.00051	0	0	2	0
14	60454171	0.52446	296	482	722	558

## Sheet: I
Supplemental Table S8. Analysis of Alu subfamilies.
(I) Family I, Figure 2I.
Chromosome	Position	Allele Frequency	AFR Allele Count	EUR Allele Count	EAS Allele Count	SAS Allele Count
2	153056950	0.00204	8	0	0	0
2	158339890	0.00178	7	0	0	0
3	72858230	0.0028	11	0	0	0
3	117409493	0.00076	3	0	0	0
11	56077880	0.00561	0	0	0	22
12	119950137	0.00051	0	0	0	2
17	59890631	0.00076	3	0	0	0
18	4266901	0.00331	13	0	0	0
X	115299124	0.00229	0	0	0	9

## Sheet: J
Supplemental Table S8. Analysis of Alu subfamilies.
(J) Raw data for assessment of Alu heterogeneity in 5 high coverage genomes.
Chromosome	Position	Bases Assessed	Bases Mutated	Allele Count
1	4288465	228	0	2
1	8446635	229	0	3
1	17234117	229	3	4
1	20944751	227	0	2
1	24941277	229	0	4
1	26228598	228	0	2
1	36474694	228	0	2
1	37215810	229	0	4
1	39677675	229	0	2
1	44208924	224	0	3
1	46679047	229	0	2
1	50912662	229	0	2
1	56879062	229	0	2
1	59871876	229	0	4
1	63461965	229	0	3
1	64882566	229	0	2
1	64958078	229	0	5
1	66055941	229	0	5
1	70061670	229	0	3
1	70091072	229	0	4
1	70912433	229	0	2
1	72514121	229	0	2
1	74471655	229	0	2
1	75148055	229	0	2
1	77468977	229	0	3
1	78607067	229	0	4
1	79582082	229	0	5
1	81524136	229	0	2
1	84913274	229	0	2
1	93167530	229	1	5
1	93498226	229	1	5
1	100994221	229	0	5
1	105054083	229	1	4
1	105138650	229	0	2
1	112992009	229	0	5
1	115201401	229	0	2
1	119080704	228	0	1
1	144951026	229	0	3
1	145098257	229	0	2
1	145152736	229	2	5
1	145211323	229	0	2
1	147855727	229	3	5
1	154123770	229	0	2
1	162761322	229	0	5
1	163088861	229	0	4
1	163314443	229	0	3
1	174333015	229	2	3
1	179491966	229	0	4
1	180857564	229	2	4
1	181047420	229	0	4
1	181588360	229	0	2
1	182420857	228	0	2
1	184950473	229	0	2
1	187522081	226	0	2
1	188186464	229	0	2
1	189247039	229	0	3
1	190874457	229	1	2
1	191477465	229	0	1
1	191580781	229	0	3
1	194675140	229	0	2
1	204238474	228	0	3
1	204345055	229	0	3
1	208691494	229	0	2
1	214911013	229	0	2
1	218001843	229	0	1
1	221969171	229	0	2
1	222870697	229	0	4
1	224241461	229	0	2
1	225996433	229	1	5
1	227462956	229	0	2
1	228959933	229	0	4
1	231085161	229	0	3
1	232587774	228	0	3
1	234070564	229	0	5
1	234805728	229	0	4
1	237967627	229	0	2
1	239426267	228	0	3
1	245989321	229	0	5
1	246406719	229	0	2
1	246592342	229	0	3
2	1194865	229	0	3
2	1471731	229	0	3
2	2539950	226	0	4
2	3630321	229	0	2
2	3718461	229	0	2
2	5562912	229	0	3
2	9888801	229	0	4
2	11353707	229	0	4
2	11426375	229	0	4
2	15163766	229	0	3
2	15519553	229	0	4
2	19748416	229	0	1
2	21381180	229	2	3
2	21796827	229	0	5
2	27527254	229	6	5
2	28054085	229	0	2
2	29806427	229	0	2
2	31559696	229	1	5
2	31952210	229	0	5
2	33231774	229	0	2
2	34255392	229	1	4
2	36476695	229	0	2
2	39315339	229	1	5
2	40613688	229	0	3
2	43024076	219	0	5
2	44825850	229	1	4
2	46196199	229	0	4
2	46928953	229	0	4
2	47319298	229	0	4
2	49733494	229	0	5
2	50602644	229	2	4
2	51613486	229	0	2
2	55116602	228	0	2
2	56373531	229	0	3
2	57247962	229	0	4
2	62501912	229	0	4
2	63779236	229	0	5
2	65163783	227	0	4
2	65333803	229	0	5
2	66658991	229	0	5
2	68143079	229	0	1
2	68733422	229	0	1
2	70783525	229	0	2
2	74125490	229	0	3
2	75387900	229	1	4
2	83831729	229	0	2
2	84728755	229	0	5
2	106452578	228	0	3
2	106585627	228	0	3
2	112041403	229	0	2
2	112447436	229	0	4
2	114106446	229	0	3
2	114222097	228	0	5
2	122085261	229	0	3
2	123330661	229	0	4
2	126370734	229	0	3
2	126641642	229	0	2
2	128638904	229	0	3
2	138259798	229	0	3
2	141534067	229	0	4
2	142114164	229	0	2
2	145346767	229	0	4
2	148477019	229	0	4
2	153248280	229	0	5
2	154160685	229	0	3
2	154752595	229	0	3
2	158279986	229	0	2
2	158510372	229	1	4
2	159285147	229	0	2
2	163678626	229	0	2
2	168732510	227	0	2
2	170036335	229	0	2
2	173316737	229	0	2
2	174728864	229	0	2
2	175735945	229	0	2
2	176728297	229	0	5
2	178351466	229	0	4
2	178648956	229	0	3
2	189853875	229	1	2
2	189959421	229	0	3
2	192840053	229	0	3
2	192982697	229	0	3
2	195578293	229	0	3
2	198763462	229	1	3
2	207976902	229	0	3
2	208472417	229	0	5
2	212845764	229	0	2
2	212925324	229	0	5
2	215201641	228	0	4
2	216548435	229	0	3
2	218265091	229	1	4
2	219576609	229	0	1
2	220937928	229	0	2
2	223882884	217	0	5
2	226753690	229	0	4
2	229229743	229	1	2
2	233845893	229	0	4
2	239883408	229	0	2
3	2962004	229	5	3
3	4205161	229	0	4
3	7130382	229	0	4
3	7133401	229	1	3
3	11204180	229	0	2
3	12818468	228	1	4
3	14083172	229	0	2
3	18995913	229	0	2
3	19035452	229	0	5
3	21470474	226	0	2
3	25278459	229	2	3
3	28840179	219	0	2
3	29239899	229	0	2
3	31881398	229	1	4
3	36839159	216	0	3
3	44340304	229	0	5
3	45542662	229	0	4
3	45692507	229	0	2
3	46661859	229	0	3
3	47782873	229	0	4
3	48746044	229	0	2
3	50879175	228	0	5
3	51763944	229	0	3
3	60460857	229	0	2
3	63540965	229	0	2
3	66091026	229	0	3
3	67689923	229	0	2
3	74255420	229	0	2
3	76985883	229	0	3
3	80964882	229	0	2
3	82056145	228	0	2
3	83304066	227	0	5
3	84832133	229	0	2
3	96596494	229	0	2
3	98726776	220	0	4
3	100177266	229	1	3
3	100410560	229	1	4
3	103453396	229	0	2
3	106289201	229	0	3
3	107893335	229	0	2
3	110987478	229	0	1
3	111226375	229	0	4
3	113047156	229	0	2
3	120318952	229	0	4
3	122445747	223	0	2
3	128395222	229	0	5
3	129938431	229	0	5
3	142460039	229	0	2
3	151748850	229	0	3
3	156239877	229	0	3
3	157962929	229	0	2
3	162637609	229	1	3
3	165336826	224	0	3
3	166362314	229	0	4
3	166390230	228	0	4
3	169951024	229	0	2
3	171319300	228	0	2
3	171626388	229	0	4
3	174250911	229	2	3
3	174410750	229	0	4
3	175673943	229	0	2
3	176143034	229	2	5
3	178111045	229	0	4
3	180190410	229	0	2
3	180484110	228	0	2
3	182299013	229	0	2
3	188883226	229	0	2
3	190999464	229	0	3
4	1301833	229	0	1
4	22286866	229	0	1
4	23511024	229	0	2
4	26438630	229	0	3
4	28320770	229	0	4
4	29907839	229	2	3
4	30892082	229	0	2
4	31444954	229	0	3
4	31591472	228	0	2
4	31841426	229	0	2
4	37358797	229	0	2
4	39410559	229	0	4
4	40700755	229	0	4
4	41598293	229	0	2
4	42088056	229	0	3
4	43399986	229	0	4
4	54415654	229	0	2
4	56371962	227	0	2
4	61055999	229	0	2
4	61825109	229	0	3
4	64563186	229	0	3
4	67106616	229	0	4
4	68944779	229	1	4
4	72714702	229	0	2
4	72719816	229	0	2
4	73889677	229	0	4
4	76993824	229	0	3
4	79159515	229	0	3
4	79289449	218	0	2
4	79322982	229	0	4
4	81899822	229	0	2
4	82630148	229	0	4
4	86470382	229	0	4
4	88634242	229	0	3
4	93076112	227	0	2
4	95413280	229	0	2
4	100376807	229	0	3
4	103133356	225	0	4
4	104744617	229	0	3
4	105597134	229	0	3
4	110934970	229	0	2
4	112698433	229	0	3
4	114018264	229	0	3
4	115549930	229	0	4
4	120720096	229	0	2
4	122413817	217	0	3
4	125350263	229	0	2
4	129207248	229	0	3
4	130401786	229	0	2
4	134922359	227	0	2
4	135130281	228	0	2
4	138299005	227	0	2
4	139225217	229	0	5
4	143258316	229	0	2
4	145395308	229	0	4
4	148053950	229	0	4
4	151293914	229	0	3
4	154901061	229	0	4
4	162356657	229	0	2
4	166190784	229	0	3
4	167338794	229	0	3
4	170834597	229	0	4
4	172288851	229	0	2
4	174044228	229	0	3
4	174149455	229	0	3
4	174786708	228	0	2
4	175211588	229	0	2
4	175534305	229	0	3
4	179198329	229	0	5
4	179444735	229	2	4
4	180256969	229	0	3
4	185651677	229	0	2
4	185977809	229	1	2
4	186361924	229	1	5
4	188686157	229	0	3
5	1585517	229	0	3
5	1812652	229	0	5
5	3995199	229	0	4
5	5595248	229	2	5
5	6218098	229	0	3
5	10634994	229	0	3
5	16716627	229	0	3
5	17712622	229	0	4
5	20928872	229	0	2
5	24150541	229	0	2
5	32762578	229	0	2
5	32925657	229	0	2
5	34113270	229	0	3
5	40181658	229	0	5
5	43541805	229	17	3
5	50785686	229	0	2
5	54402129	229	1	2
5	54865800	229	1	5
5	61635361	229	0	4
5	61857118	229	0	2
5	73145926	229	0	2
5	75874710	229	0	2
5	76753604	229	0	2
5	77654187	227	0	3
5	84384492	229	0	3
5	84516075	229	0	2
5	84544402	229	0	2
5	84929791	229	1	3
5	94994220	229	0	2
5	99093623	229	0	4
5	100497396	229	0	5
5	103464426	228	1	3
5	108026595	229	0	3
5	109051004	229	0	3
5	114355263	229	0	3
5	118977635	229	1	3
5	122582810	229	0	2
5	124147824	229	0	3
5	130853258	229	0	4
5	132170761	229	0	3
5	139595138	229	0	4
5	141758655	228	0	3
5	141917539	228	0	2
5	142355011	229	0	3
5	143407146	217	0	4
5	152529738	229	0	3
5	158717172	229	0	2
5	159122155	229	0	3
5	162231951	229	1	4
5	168911933	225	0	2
5	170201339	229	0	5
5	174760806	229	0	2
5	180349604	229	0	2
6	6034776	229	0	3
6	13718477	218	0	3
6	17416398	224	0	2
6	18346400	229	0	3
6	19137109	229	0	4
6	19346454	229	0	3
6	20887919	229	1	4
6	23978357	229	0	4
6	29998496	229	0	4
6	31439016	229	0	3
6	32449295	229	1	2
6	32469188	229	13	2
6	32480052	229	1	4
6	32486116	229	0	2
6	32514488	228	0	2
6	32521221	228	0	2
6	32546394	228	0	2
6	32657952	228	1	3
6	32687168	229	5	3
6	36968553	229	0	3
6	40046909	229	0	4
6	40170295	229	0	3
6	43895487	229	0	4
6	44798632	229	0	2
6	45260479	229	0	5
6	47312785	229	0	2
6	47708271	229	0	2
6	50756933	229	0	2
6	51929672	229	0	1
6	52537128	227	1	2
6	52651114	224	0	4
6	52652833	224	0	4
6	52691462	223	0	5
6	53648758	229	0	5
6	55007928	229	0	3
6	57465236	229	0	4
6	58146657	229	0	3
6	66163982	229	0	4
6	66816124	223	0	5
6	68311311	226	0	4
6	68314068	229	0	5
6	68502445	229	0	3
6	69543462	229	0	3
6	69642782	229	0	2
6	70327746	229	0	2
6	71729316	229	0	2
6	72254382	229	0	3
6	72580496	228	0	3
6	74504855	229	1	5
6	74668019	229	0	2
6	77357789	229	1	2
6	77548621	228	0	3
6	78416769	227	0	2
6	81381061	229	0	2
6	82297438	229	0	2
6	88698077	229	0	2
6	93576148	229	0	5
6	93853192	228	0	2
6	94930783	229	0	1
6	95368373	227	0	2
6	96509180	229	0	5
6	99471374	228	0	3
6	100328161	229	0	3
6	100407499	229	0	2
6	102172012	229	0	2
6	102220581	229	0	3
6	102958482	229	0	4
6	104350579	229	0	4
6	104490683	229	0	4
6	104772669	229	0	3
6	110626754	229	0	2
6	116844156	229	0	2
6	116898686	229	0	3
6	119394056	229	0	2
6	120380263	229	0	2
6	120568262	229	0	5
6	122980009	229	0	4
6	125421421	229	0	3
6	126423676	229	0	3
6	129895109	229	0	3
6	131028588	228	0	2
6	131113279	229	0	2
6	131273499	229	0	3
6	133160120	229	1	4
6	140417842	229	0	2
6	141134067	229	0	4
6	141770882	228	0	3
6	143951375	228	0	3
6	153633385	229	0	2
6	159166302	229	0	3
6	159204431	228	0	3
6	163467402	229	0	2
6	163742412	228	0	2
6	163814230	229	0	5
6	167124812	229	0	5
6	170500768	229	0	4
7	22799818	229	0	2
7	22853492	229	0	4
7	25059646	229	1	3
7	27804522	229	26	2
7	32831241	229	0	2
7	33679701	229	0	2
7	36252166	228	1	4
7	37836651	229	0	5
7	38209213	229	0	3
7	38759715	229	0	3
7	39749709	229	0	3
7	42647660	229	0	4
7	47670422	229	0	3
7	47832653	229	0	3
7	49057624	229	0	4
7	52809400	229	0	2
7	53448000	229	0	2
7	55851357	229	0	2
7	56244918	229	2	5
7	63880196	229	0	2
7	76567224	229	0	3
7	82430525	229	0	4
7	82851756	229	0	2
7	82947153	229	0	4
7	85013802	229	1	2
7	88380351	229	0	2
7	91751552	229	0	3
7	93357393	229	0	4
7	94779065	229	0	2
7	97067538	229	0	2
7	104895589	229	0	3
7	105564465	229	0	4
7	109283352	229	0	3
7	110501740	229	0	2
7	113654434	229	0	2
7	115865235	229	0	3
7	118083314	229	1	4
7	120538086	227	0	3
7	124593024	229	0	4
7	124879111	228	0	4
7	127929330	229	0	5
7	128150843	228	0	2
7	129157161	229	0	5
7	136067483	229	0	2
7	136178809	227	0	3
7	138504459	229	0	2
7	147585790	229	0	3
7	148100161	221	0	2
7	148178646	229	0	2
7	153966050	229	0	2
7	154858220	229	0	3
7	155110596	224	0	2
7	157350794	229	0	2
7	157448787	229	0	4
8	3626974	228	0	2
8	9463661	229	0	3
8	9665673	229	0	5
8	9807901	229	1	5
8	13561289	229	0	3
8	13975433	229	0	3
8	15399348	227	0	2
8	15548520	229	0	2
8	17336018	229	0	2
8	17943136	229	0	2
8	18617477	229	0	3
8	19658938	229	1	4
8	24779114	217	0	3
8	25172660	223	0	4
8	26073403	229	0	5
8	26215665	229	0	2
8	30644025	229	0	2
8	32359986	229	0	2
8	34469659	229	0	2
8	35069037	229	0	4
8	38864077	229	0	4
8	41270468	229	0	4
8	42039906	229	1	4
8	49045494	229	0	3
8	61526797	229	0	3
8	65461772	229	0	3
8	68981808	229	0	5
8	71774807	229	0	2
8	71914591	229	0	3
8	73065375	229	0	2
8	80903545	229	0	2
8	83351478	229	0	2
8	85437274	229	3	4
8	87079637	223	0	4
8	87770103	229	0	2
8	90669905	229	0	4
8	92677086	227	0	2
8	94162488	228	0	3
8	96467794	229	0	2
8	96657280	229	0	3
8	96783548	229	0	4
8	103554126	224	1	5
8	106664522	229	0	3
8	107207888	228	0	4
8	110101605	228	0	2
8	114792920	229	0	2
8	122155287	229	0	3
8	126024111	229	0	2
8	129244941	229	0	3
8	130712205	229	0	2
8	137062205	229	0	2
8	138295195	229	0	4
8	139057085	229	0	1
8	139325979	229	0	5
8	141048062	229	0	3
9	262463	228	0	2
9	1631826	229	0	2
9	2351303	229	3	3
9	6780329	229	0	2
9	7035327	229	0	3
9	7852538	229	0	5
9	10461263	229	1	4
9	12601800	229	0	3
9	16682313	225	0	3
9	21038502	229	0	2
9	21109523	229	0	4
9	21261949	229	0	3
9	22288724	229	0	5
9	22395722	229	0	5
9	28195389	229	0	2
9	28960619	229	0	4
9	30734684	229	0	3
9	32080547	229	0	2
9	33700134	229	0	2
9	37594249	229	0	5
9	38767774	229	0	4
9	38791174	229	0	2
9	40609334	225	0	4
9	74544792	229	0	2
9	75542985	229	0	3
9	76197800	229	0	3
9	79451284	229	0	2
9	81596134	229	1	3
9	93057522	229	0	4
9	95680508	229	0	2
9	96371386	229	0	2
9	97314256	229	0	2
9	97387416	227	0	4
9	101090325	229	0	2
9	105450619	229	0	4
9	109235274	229	0	2
9	111912272	228	0	1
9	112261393	229	0	2
9	120390733	228	0	2
9	123055181	229	0	4
10	2077560	229	0	5
10	2241011	229	0	2
10	2388062	229	0	3
10	2721270	229	0	2
10	3569025	229	0	4
10	9474855	229	0	2
10	9510994	229	0	5
10	9904407	229	0	2
10	12457219	229	0	2
10	14396698	229	0	2
10	19550733	229	0	2
10	21192833	229	0	2
10	25618711	229	0	2
10	26852979	229	0	3
10	27929928	229	1	5
10	29102541	229	0	5
10	29105298	228	0	5
10	30614778	229	1	3
10	35995068	229	0	4
10	36593631	229	0	3
10	53209407	228	0	2
10	54396005	229	0	2
10	54466942	229	0	4
10	54805970	229	0	4
10	55291425	229	0	2
10	55983295	229	0	3
10	56181235	229	0	2
10	56902369	229	0	5
10	57974632	229	0	5
10	58902214	218	0	2
10	60984921	229	0	4
10	66837069	229	0	2
10	67431003	229	0	3
10	68217408	229	0	2
10	69994906	229	0	4
10	71610175	228	3	4
10	73193547	229	2	2
10	89373681	229	0	3
10	92215072	229	0	5
10	92227511	229	0	2
10	96763987	224	0	2
10	107891561	224	1	5
10	108991284	229	0	5
10	112010768	222	0	2
10	114073874	229	0	5
10	115048265	229	0	2
10	117006342	229	0	5
10	118094981	229	0	3
10	123228984	229	0	2
10	124736004	229	0	4
10	129190292	229	0	2
10	132145586	229	0	2
10	134029014	229	0	2
11	428027	229	1	4
11	5885149	229	0	3
11	7092800	229	0	3
11	7352462	229	0	3
11	7612697	229	0	4
11	8446373	229	0	2
11	8887317	229	0	2
11	10637493	228	0	4
11	13813034	229	0	3
11	14500027	229	0	3
11	16019994	229	0	3
11	19963012	229	0	2
11	23358517	229	0	5
11	23522804	229	0	4
11	24792959	229	0	5
11	25605138	229	0	4
11	25653710	229	0	3
11	27039982	229	0	3
11	32388079	229	0	4
11	32434278	229	0	4
11	32892058	229	0	3
11	33235122	229	0	3
11	37706295	228	0	4
11	38801075	229	1	5
11	40494018	229	0	5
11	43191343	229	0	4
11	43877448	229	0	2
11	48933125	229	0	5
11	49282683	229	0	2
11	55320507	229	0	2
11	56303363	229	0	4
11	60293400	229	1	3
11	61145214	229	0	5
11	65503484	229	0	4
11	72320922	229	0	3
11	77294981	229	0	2
11	81283884	229	0	2
11	84701731	229	0	3
11	87149867	229	0	2
11	92608491	229	0	5
11	95823128	224	0	3
11	98774702	229	0	4
11	100781393	229	0	2
11	102525481	229	0	2
11	103201276	229	0	4
11	103792604	229	2	3
11	104144748	229	0	2
11	104786608	229	0	5
11	105836051	229	0	3
11	106044581	229	1	5
11	106170481	229	0	5
11	110276938	229	0	2
11	117683506	229	0	1
11	123618336	229	0	2
11	126941133	229	1	3
11	127997835	229	0	2
11	128997480	223	0	4
11	130675924	228	0	4
11	134659555	229	0	2
12	1057146	229	0	3
12	2089856	229	0	3
12	2323900	227	0	2
12	4770885	229	0	3
12	5769602	217	0	3
12	9369239	229	0	3
12	9871162	229	1	3
12	10234202	229	0	5
12	11072856	229	0	2
12	14173879	229	0	4
12	15104647	229	0	4
12	18368798	229	0	2
12	20908685	229	0	4
12	22085955	229	0	4
12	22123796	229	0	5
12	24451731	229	0	3
12	24518627	229	0	3
12	25462949	229	0	3
12	26697612	229	0	2
12	26958536	229	0	3
12	27864811	229	0	3
12	28438608	229	0	3
12	30420657	229	0	3
12	30471069	229	0	3
12	31120751	229	0	2
12	31406649	229	0	3
12	32076427	229	0	4
12	40210407	225	0	2
12	40673027	229	1	2
12	40832796	229	0	2
12	43717940	229	0	2
12	45419555	229	2	4
12	46175166	229	3	5
12	48312490	229	0	2
12	58359071	229	0	5
12	58458223	229	0	4
12	59219062	229	1	4
12	59355394	228	0	2
12	59491937	229	1	2
12	60677845	228	0	3
12	61704147	229	0	3
12	61838511	229	0	3
12	62417392	229	0	3
12	62880052	228	0	3
12	63277705	229	0	2
12	63630483	229	0	3
12	67011588	229	0	2
12	71525479	229	0	2
12	75201653	229	0	4
12	75320691	229	0	3
12	75931101	229	0	4
12	78396948	228	0	3
12	80309803	228	0	3
12	80480726	229	0	2
12	81315233	229	0	4
12	83061509	229	0	3
12	84086124	229	0	3
12	86653570	226	1	5
12	87870823	229	0	5
12	88338170	229	0	4
12	96705377	229	0	3
12	97495358	229	0	3
12	101450693	229	0	5
12	104015098	228	0	2
12	105438378	229	0	4
12	114545429	224	0	2
12	130455055	229	0	4
13	22188494	229	0	4
13	22530362	229	0	3
13	24482756	229	0	2
13	24620695	229	0	2
13	26816264	229	0	4
13	29538890	229	1	5
13	30031581	229	0	2
13	38181991	229	0	2
13	42571560	229	0	5
13	42940088	229	0	5
13	46268079	229	0	3
13	47095353	229	0	5
13	50042764	229	0	4
13	54606529	229	0	2
13	56186576	229	0	5
13	58761425	227	0	3
13	59377684	229	0	3
13	59396895	229	0	5
13	61162472	229	0	3
13	61367408	229	0	4
13	61787418	229	0	3
13	62588972	229	0	2
13	62721074	229	0	5
13	64964535	229	0	2
13	65496843	229	0	2
13	66014522	229	0	3
13	78584671	229	0	3
13	78651687	229	0	3
13	79271601	229	0	5
13	80199092	229	0	2
13	81373740	229	0	1
13	81810192	229	0	4
13	83747484	229	0	3
13	89900358	229	0	2
13	90038686	229	0	4
13	90401846	229	0	2
13	90550575	229	0	5
13	90903276	229	0	2
13	90947651	229	0	5
13	92161674	229	0	3
13	92261286	229	0	4
13	92825238	228	0	4
13	92883857	229	0	2
13	93828421	224	0	5
13	94105819	229	0	2
13	99765009	229	0	5
13	100082627	229	0	4
13	101535973	229	0	2
13	101577244	229	1	2
13	102389382	229	1	3
13	104558095	229	0	2
13	108669030	229	0	3
13	108719818	229	0	3
13	111076811	229	0	4
13	113520967	229	0	3
14	20484312	229	0	4
14	25581763	224	0	2
14	26524451	229	0	2
14	33254201	229	0	2
14	34055451	226	0	3
14	34493354	229	0	1
14	38359643	229	0	4
14	40312966	229	1	5
14	40579685	229	0	3
14	40882900	229	0	5
14	44522313	229	0	2
14	45014099	229	0	5
14	47836102	229	0	2
14	51432094	229	0	5
14	51719000	229	0	2
14	52643767	224	0	3
14	53778127	229	0	4
14	53800186	229	0	3
14	54815743	229	0	2
14	55795871	229	0	4
14	57508006	227	0	2
14	60454171	229	0	5
14	60575499	229	0	5
14	60741400	228	0	2
14	63226297	229	0	3
14	65015043	229	0	5
14	66263166	228	0	2
14	66934461	229	0	2
14	71480284	229	0	2
14	74186546	229	0	3
14	74942158	229	0	3
14	75499581	229	0	5
14	77116243	229	0	2
14	78982709	227	0	3
14	84632740	229	0	2
14	86630702	228	0	2
14	87375567	229	0	2
14	87399089	229	0	2
14	91185194	229	0	3
14	92125068	229	0	5
14	93830941	229	0	3
14	98494393	229	0	5
14	103028457	229	1	4
14	106480860	229	0	2
14	106788861	229	0	2
15	22769074	229	0	4
15	25735669	229	0	4
15	26872523	229	0	3
15	27765791	229	0	4
15	34113099	224	1	3
15	35473633	229	0	4
15	36096324	228	0	3
15	38718004	229	0	3
15	45569923	229	0	3
15	46126006	229	0	3
15	49609604	229	0	2
15	54286401	229	0	2
15	54448991	229	0	3
15	60657259	229	0	5
15	61216544	229	1	4
15	63287086	229	3	3
15	67294860	229	0	3
15	67644904	229	0	2
15	70408630	229	0	4
15	70747315	229	0	3
15	71153757	229	0	2
15	72639551	229	0	4
15	73983319	229	0	3
15	79795885	229	0	5
15	81392597	229	0	3
15	92573054	229	0	3
15	93372761	229	0	5
15	94715743	229	0	2
15	94819903	229	0	4
15	97321243	229	0	2
15	97770234	229	1	5
15	100343324	229	0	3
15	100810993	229	0	5
15	100812817	229	0	5
16	7541395	217	0	3
16	8418196	229	2	3
16	11086408	229	0	3
16	12049712	229	0	3
16	14499317	229	0	2
16	22846017	228	0	2
16	23865300	229	0	4
16	24327581	229	0	4
16	53874981	229	0	4
16	60041162	229	0	3
16	61092204	229	0	2
16	65482204	229	0	4
16	69395848	229	0	2
16	80217439	229	0	4
16	80696994	223	0	2
16	80848077	228	0	3
16	82912115	229	0	4
16	83666374	229	0	4
16	85108708	229	0	2
16	87191672	229	0	4
16	89291389	229	0	3
17	3802555	229	4	5
17	13045155	229	0	3
17	13799656	229	0	5
17	14527654	229	0	4
17	17734394	228	0	3
17	25595069	229	0	4
17	29842491	229	0	2
17	30893862	229	1	4
17	32734421	229	0	4
17	35427970	229	2	5
17	35922028	229	0	2
17	36169343	229	0	5
17	46505002	229	0	4
17	48998434	228	0	2
17	51031208	229	0	2
17	51957128	229	0	3
17	55780428	229	0	2
17	65303518	229	0	3
17	67875362	229	0	3
17	74046824	229	0	4
17	76347346	228	9	5
17	78056044	229	13	5
17	79120759	229	0	3
18	853490	229	1	5
18	1235790	229	0	5
18	3669136	228	0	2
18	10911136	228	0	4
18	12396641	229	0	4
18	19705161	229	0	2
18	25871829	229	0	5
18	27156370	229	0	3
18	27182104	229	0	3
18	27800861	229	0	5
18	36512546	229	0	4
18	38348168	229	0	5
18	38686586	229	0	3
18	49301388	227	0	2
18	49931759	229	0	3
18	50452268	229	0	2
18	50986552	229	0	2
18	53146075	225	0	2
18	54706193	229	1	5
18	55949368	226	0	2
18	57372771	228	0	4
18	59713734	229	0	3
18	60686113	229	0	4
18	62173798	226	1	4
18	63487287	229	0	4
18	66399175	229	0	4
18	66572501	229	0	5
18	73953939	229	0	5
18	74563049	229	0	2
18	74638701	229	0	5
18	75846483	229	0	3
19	3762013	228	0	2
19	12827978	229	0	2
19	15927952	229	3	5
19	20745988	229	1	4
19	30448212	229	0	4
19	31690684	229	0	5
19	35073552	229	0	3
19	53309849	229	0	3
19	56966061	229	0	3
19	57023579	229	0	2
19	57425532	229	2	4
20	1546228	229	0	4
20	1990376	229	0	3
20	3242418	229	0	2
20	8670617	219	0	5
20	8816504	229	0	2
20	10377921	228	0	2
20	13704161	229	0	2
20	15087673	229	0	4
20	16830806	229	0	5
20	26190974	229	0	2
20	32793460	229	0	3
20	38210682	229	0	3
20	38301653	229	0	2
20	47206191	225	0	4
20	50570373	229	0	2
20	52725238	229	1	5
20	53761850	229	1	5
21	10725308	229	0	2
21	14415002	229	1	5
21	21256658	229	0	2
21	23243085	229	0	2
21	23817341	229	0	4
21	24975502	229	0	2
21	26354237	229	0	4
21	26497431	229	0	2
21	28249247	229	0	3
21	28561038	229	0	3
21	37237944	229	0	5
21	47042373	229	0	3
22	17705308	229	0	4
22	19906775	229	27	5
22	22534136	229	0	5
22	23170887	229	0	5
22	23872682	229	0	2
22	34430612	229	1	5
22	40403412	229	1	4
22	50273448	224	0	3
X	2039024	229	2	5
X	2496936	229	1	5
X	32001083	229	0	2
X	33302850	224	0	3
X	34242454	229	0	5
X	35028103	229	0	5
X	39939333	229	0	2
X	47708097	228	0	1
X	76574661	229	0	2
X	106661474	229	0	4
X	116627643	229	0	2
X	116838864	228	0	2
X	119527856	229	0	2
X	126583432	229	0	2
X	130921952	229	0	3
X	136349840	229	0	3
X	149451325	229	0	2
X	152001805	229	0	2
Y	3407718	225	0	2

[truncated: 1 more sheets: Legend]
