# Supplementary material for: The Mobile Element Locator Tool (MELT): population-scale mobile element discovery and biology
Source: Genome Res. 2017 Nov;27(11):1916–29. doi: 10.1101/gr.218032.116 (PMC5668948; doi:10.1101/gr.218032.116)
Supplement: Supplemental Material [file supp_gr.218032.116_Supplemental_Table_S10.xlsx]

## Sheet: A
Supplemental Table S10. Analysis of 5’ inversions.
(A) 5’ inversions detected in this study.
Source	# offspring	# inverted	# measured	% inverted
All 1KGP	4118	298	1634	0.1823745
Chimp	4381	265	1817	0.145845
2:156527848	41	2	14	0.142857
6:13191033	14	0	6	0
1:119401003	13	5	9	0.555556
Non-hot transducers	53	5	30	0.166667
Source elements below this line are summed as "non-hot transducers" above
X:11731399	4	0	1	0
1:84518059	3	0	2	0
3:89509975	3	0	2	0
14:59220402	3	0	1	0
4:80894087	3	0	1	0
3:172749134	2	1	2	0.5
4:75642765	2	0	1	0
6:24811906	2	1	2	0.5
8:135082986	2	0	1	0
22:29065303	2	0	1	0
1:114045879	2	0	1	0
1:81404888	1	1	1	1
1:86398783	1	0	1	0
1:187312896	1	0	1	0
2:29669568	1	0	0	NM
2:144010793	1	1	1	1
2:148952342	1	1	1	1
3:55788580	1	0	0	NM
3:55788581	1	0	0	NM
3:80590176	1	0	1	0
3:86184828	1	0	0	NM
4:99513586	1	0	1	0
4:128965442	1	0	1	0
5:79074736	1	0	1	0
5:85812536	1	0	0	NM
6:29919990	1	0	0	NM
6:63368207	1	0	1	0
10:100542698	1	0	1	0
12:3608361	1	0	0	NM
12:117814460	1	0	0	NM
17:67177630	1	0	0	NM
18:15095262	1	0	1	0
X:11953207	1	0	0	NM
X:82314613	1	0	1	0
X:146741285	1	0	1	0
2:173186025	1	0	1	0

## Sheet: B
Supplemental Table S10. Analysis of 5’ inversions.
(B) Rates of 5’ inversion for specific source elements in this study and the literature.
Chr	Pos	Study	# inverted	# measured	% inverted	PMID	Notes
22	29059272-29065303	Tubio et. al. 2014	42	93	0.451613	25082706	In 290 tumors of 12 tumor types
6	13191015-13191013	Tubio et. al. 2014	39	89	0.438202	25082706	In 290 tumors of 12 tumor types
3	123590727-123590709	Tubio et. al. 2014	8	38	0.210526	25082706	In 290 tumors of 12 tumor types
14	59220408-59220378	Tubio et. al. 2014	15	36	0.416667	25082706	In 290 tumors of 12 tumor types
2	156527841-156527820	Tubio et. al. 2014	6	21	0.285714	25082706	In 290 tumors of 12 tumor types
5	89450783-89450771	Tubio et. al. 2014	5	18	0.277778	25082706	In 290 tumors of 12 tumor types
X	11953208-11959433	Tubio et. al. 2014	7	18	0.388889	25082706	In 290 tumors of 12 tumor types
2	156527848	This study	6	14	0.428571	N/A	In 1KGP
5	39787755-39793773	Tubio et. al. 2014	6	13	0.461538	25082706	In 290 tumors of 12 tumor types
14	59160899	Scott et. al. 2016	10	12	0.833333	27197217	In one CRC tumor
14	31150830-31150811	Tubio et. al. 2014	5	8	0.625	25082706	In 290 tumors of 12 tumor types
1	119401003	This study	6	8	0.75	N/A	In 1KGP
18	57071172-57077202	Tubio et. al. 2014	2	7	0.285714	25082706	In 290 tumors of 12 tumor types
1	119394975-119401003	Tubio et. al. 2014	1	7	0.142857	25082706	In 290 tumors of 12 tumor types
20	23406746-23412777	Tubio et. al. 2014	2	7	0.285714	25082706	In 290 tumors of 12 tumor types
6	19765124-19771149	Tubio et. al. 2014	0	7	0	25082706	In 290 tumors of 12 tumor types
X	11725369-11731399	Tubio et. al. 2014	1	7	0.142857	25082706	In 290 tumors of 12 tumor types
12	3608362-3614394	Tubio et. al. 2014	3	6	0.5	25082706	In 290 tumors of 12 tumor types
13	61462309-61462332	Tubio et. al. 2014	2	6	0.333333	25082706	In 290 tumors of 12 tumor types
5	154595987-154596015	Tubio et. al. 2014	0	6	0	25082706	In 290 tumors of 12 tumor types
6	29920101-29920277	Tubio et. al. 2014	2	6	0.333333	25082706	In 290 tumors of 12 tumor types
6	13191033	This study	1	6	0.166667	N/A	In 1KGP
Source elements below this line were excluded from figures (see tab E)
Unk	Non-hot transducers	This study	10	29	0.344828	N/A	In 1KGP
Unk	Unk	Scott 2016	5	8	0.625	27197217	Unknown or not determined source element in one CRC
17	18776467	Scott 2016	3	5	0.6		In one CRC tumor
1	84518060-84524089	Tubio 2014	3	5	0.6		In 290 tumors of 12 tumor types
2	135117676-135117685	Tubio 2014	0	5	0		In 290 tumors of 12 tumor types
7	141620482-141626512	Tubio 2014	2	5	0.4		In 290 tumors of 12 tumor types
9	115560408-115566439	Tubio 2014	3	5	0.6		In 290 tumors of 12 tumor types
6	29919725	Helman 2014	3	4	0.75		In one HNSC tumor
10	111572184-111578215	Tubio 2014	3	4	0.75		In 290 tumors of 12 tumor types
1	87144764-87150794	Tubio 2014	1	4	0.25		In 290 tumors of 12 tumor types
2	36570274-36570269	Tubio 2014	2	4	0.5		In 290 tumors of 12 tumor types
5	112703080-112703070	Tubio 2014	1	4	0.25		In 290 tumors of 12 tumor types
7	53652494-53652523	Tubio 2014	2	4	0.5		In 290 tumors of 12 tumor types
11	87840675-87840657	Tubio 2014	0	3	0		In 290 tumors of 12 tumor types
18	12106045-12106068	Tubio 2014	1	3	0.333333		In 290 tumors of 12 tumor types
1	114039843-114045879	Tubio 2014	1	3	0.333333		In 290 tumors of 12 tumor types
3	151148535-151148548	Tubio 2014	1	3	0.333333		In 290 tumors of 12 tumor types
3	55788573-55788577	Tubio 2014	2	3	0.666667		In 290 tumors of 12 tumor types
4	112628956-112628982	Tubio 2014	1	3	0.333333		In 290 tumors of 12 tumor types
5	109480275-109480254	Tubio 2014	0	3	0		In 290 tumors of 12 tumor types
8	135082987-135089016	Tubio 2014	1	3	0.333333		In 290 tumors of 12 tumor types
12	117814460	Scott 2016	1	2	0.5		In one CRC tumor
14	58290138-58290461	Rodic 2015	0	2	0		In one PDAC tumor
17	64637258-64637272	Tubio 2014	1	2	0.5		In 290 tumors of 12 tumor types
2	23190961-23191000	Tubio 2014	1	2	0.5		In 290 tumors of 12 tumor types
3	20090525-20090512	Tubio 2014	1	2	0.5		In 290 tumors of 12 tumor types
6	24811907-24817711	Tubio 2014	0	2	0		In 290 tumors of 12 tumor types
6	9950853-9950856	Tubio 2014	1	2	0.5		In 290 tumors of 12 tumor types
7	65751841-65757871	Tubio 2014	2	2	1		In 290 tumors of 12 tumor types
9	85664455-85670486	Tubio 2014	0	2	0		In 290 tumors of 12 tumor types
1	84518059	This study	0	2	0		In 1KGP
3	89509975	This study	0	2	0		In 1KGP
3	172749134	This study	1	2	0.5		In 1KGP
6	24811906	This study	1	2	0.5		In 1KGP
8	57161596	Helman 2014	1	1	1		In one HNSC tumor
22	29059272	Helman 2014	0	1	0		In one HNSC tumor
8	135082972	Helman 2014	0	1	0		In one HNSC tumor
3	55788568	Helman 2014	0	1	0		In one HNSC tumor
18	57071169	Helman 2014	0	1	0		In one HNSC tumor
1	119394975-119401003	Solyom 2012	1	1	1		1 3' transduction (Ins #50) in 1 CRC tumor
8	73787792-73793823	Evrony 2012	0	1	0		1 somatic 5' transduction
10	19377514-19383547	Tubio 2014	0	1	0		In 290 tumors of 12 tumor types
11	14737455-14743484	Tubio 2014	1	1	1		In 290 tumors of 12 tumor types
11	62111912-62111910	Tubio 2014	0	1	0		In 290 tumors of 12 tumor types
11	87566584-87566645	Tubio 2014	0	1	0		In 290 tumors of 12 tumor types
13	61221130-61221153	Tubio 2014	0	1	0		In 290 tumors of 12 tumor types
13	77186959-77192986	Tubio 2014	0	1	0		In 290 tumors of 12 tumor types
14	52667751-52667802	Tubio 2014	0	1	0		In 290 tumors of 12 tumor types
15	56251153-56251200	Tubio 2014	0	1	0		In 290 tumors of 12 tumor types
15	68688010-68688056	Tubio 2014	0	1	0		In 290 tumors of 12 tumor types
15	84052404-84058368	Tubio 2014	0	1	0		In 290 tumors of 12 tumor types
1	121274033-121280059	Tubio 2014	0	1	0		In 290 tumors of 12 tumor types
1	196188501-196194532	Tubio 2014	1	1	1		In 290 tumors of 12 tumor types
1	214403533-214403527	Tubio 2014	0	1	0		In 290 tumors of 12 tumor types
1	72353887-72359918	Tubio 2014	1	1	1		In 290 tumors of 12 tumor types
21	19082273-19082366	Tubio 2014	0	1	0		In 290 tumors of 12 tumor types
22	29059271-29065303	Tubio 2014	1	1	1		In 290 tumors of 12 tumor types
3	27529295-27529293	Tubio 2014	0	1	0		In 290 tumors of 12 tumor types
3	38330319-38330371	Tubio 2014	0	1	0		In 290 tumors of 12 tumor types
3	53399324-53405352	Tubio 2014	1	1	1		In 290 tumors of 12 tumor types
3	89509975-89516006	Tubio 2014	1	1	1		In 290 tumors of 12 tumor types
3	97929285-97929325	Tubio 2014	0	1	0		In 290 tumors of 12 tumor types
4	141359616-141359617	Tubio 2014	1	1	1		In 290 tumors of 12 tumor types
4	152732645-152732711	Tubio 2014	1	1	1		In 290 tumors of 12 tumor types
4	23616395-23622409	Tubio 2014	0	1	0		In 290 tumors of 12 tumor types
4	80888061-80894087	Tubio 2014	0	1	0		In 290 tumors of 12 tumor types
5	15439647-15439633	Tubio 2014	0	1	0		In 290 tumors of 12 tumor types
5	31978821-31978826	Tubio 2014	0	1	0		In 290 tumors of 12 tumor types
5	80911910-80917937	Tubio 2014	0	1	0		In 290 tumors of 12 tumor types
6	123853932-123853976	Tubio 2014	1	1	1		In 290 tumors of 12 tumor types
6	157968403-157968568	Tubio 2014	0	1	0		In 290 tumors of 12 tumor types
6	72799421-72799524	Tubio 2014	0	1	0		In 290 tumors of 12 tumor types
7	138717121-138716859	Tubio 2014	1	1	1		In 290 tumors of 12 tumor types
7	23825391-23825417	Tubio 2014	0	1	0		In 290 tumors of 12 tumor types
7	30478858-30484890	Tubio 2014	0	1	0		In 290 tumors of 12 tumor types
8	126595131-126601133	Tubio 2014	1	1	1		In 290 tumors of 12 tumor types
8	57161904-57161887	Tubio 2014	0	1	0		In 290 tumors of 12 tumor types
8	73787792-73793823	Tubio 2014	0	1	0		In 290 tumors of 12 tumor types
X	105712516-105718549	Tubio 2014	1	1	1		In 290 tumors of 12 tumor types
X	140515278-140515267	Tubio 2014	0	1	0		In 290 tumors of 12 tumor types
X	31225057-31225044	Tubio 2014	1	1	1		In 290 tumors of 12 tumor types
X	11731399	This study	1	1	1		In 1KGP
14	159220402	This study	0	1	0		In 1KGP
4	80894087	This study	0	1	0		In 1KGP
4	75642765	This study	0	1	0		In 1KGP
8	135082986	This study	0	1	0		In 1KGP
22	29065303	This study	1	1	1		In 1KGP
1	114045879	This study	0	1	0		In 1KGP
1	81404888	This study	1	1	1		In 1KGP
1	187312896	This study	0	1	0		In 1KGP
2	144010793	This study	1	1	1		In 1KGP
2	148952342	This study	1	1	1		In 1KGP
3	80590176	This study	0	1	0		In 1KGP
4	99513586	This study	0	1	0		In 1KGP
4	128965442	This study	0	1	0		In 1KGP
5	79074736	This study	1	1	1		In 1KGP
6	63368207	This study	0	1	0		In 1KGP
10	100542698	This study	0	1	0		In 1KGP
18	15095262	This study	1	1	1		In 1KGP
X	82314613	This study	0	1	0		In 1KGP
X	146741285	This study	1	1	1		In 1KGP
2	173186025	This study	0	1	0		In 1KGP
11	14114182-14114187	Tubio 2014	0	0	0		In 290 tumors of 12 tumor types
1	165553149-165553134	Tubio 2014	0	0	0		In 290 tumors of 12 tumor types
1	91775352-91775384	Tubio 2014	0	0	0		In 290 tumors of 12 tumor types
3	145254661-145254643	Tubio 2014	0	0	0		In 290 tumors of 12 tumor types
4	143300658-143300663	Tubio 2014	0	0	0		In 290 tumors of 12 tumor types
6	115326054-115326147	Tubio 2014	0	0	0		In 290 tumors of 12 tumor types
6	145500621-145500846	Tubio 2014	0	0	0		In 290 tumors of 12 tumor types
6	51531356-51536769	Tubio 2014	0	0	0		In 290 tumors of 12 tumor types
8	64289182-64289241	Tubio 2014	0	0	0		In 290 tumors of 12 tumor types
9	111564969-111564954	Tubio 2014	0	0	0		In 290 tumors of 12 tumor types

## Sheet: C
Supplemental Table S10. Analysis of 5’ inversions.
(C) Rates of germline and somatic 5’ inversion in the literature.
Study	# inverted	# measured	% inverted	Location	PMID	Notes
Ostertag et. al. 2001	16	66	0.242424	Germline	11731496	Ta and pre-Ta L1s
Myers et. al. 2002	79	399	0.197995	Germline	12070800	L1-Tas in human ref genome draft
Szak et. al. 2002	6063	72148	0.0840356	Germline	12372140	Younger L1s (including Hs, P1, P2, P3) in human genome; Including 11 FL-L1s
Salem et. al. 2003	100	356	0.280899	Germline	12589758	L1-preTas in human ref genome draft
Xing et. al. 2009	11	52	0.211538	Germline	19439515	Non-REF L1 insertions in one individual
Hancks et. al. 2016	7	28	0.25	Germline	27158268	Germline L1 insertions that caused disease
Ewing et. al. 2011	206	953	0.216159	Germline	20980553	Non-REF L1 insertions in 310 individuals from 1000 Genomes Project
Lee et. al. 2012	47	183	0.256831	Somatic	22745252	In 43 tumors of 5 tumor types
Solyom et. al. 2012	10	35	0.285714	Somatic	22968929	In 16 colon tumors
Shukla et. al. 2013	2	10	0.2	Somatic	23540693	In 19 liver tumors
Helman et. al. 2014	397	802	0.495012	Somatic	24823667	In 200 tumors of 11 tumor types; No option for "not measured" for 5' inversion
Tubio et. al. 2014	973	2533	0.384129	Somatic	25082706	In 290 tumors of 12 tumor types
Rodic et. al. 2015	35	75	0.466667	Somatic	26259033	In 20 pancreatic tumors; Found 465 somatic insertions, but only did PCR+Sanger of 75 from 3 tumors
Doucet-O'Hare et. al. 2015	11	35	0.314286	Somatic	26283398	In 20 esophageal cancer/precancerous lesions; Found 118 somatic insertions, but only sequenced 5' end of 35
Scott et. al. 2016	19	27	0.703704	Somatic	27197217	In one L1-initiated colon tumor
This study	488	1517	0.321688	Germline	N/A	All 1KGP
This study	990	2542	0.389457	Germline	N/A	Chimp

## Sheet: D
Supplemental Table S10. Analysis of 5’ inversions.
(D) Rates of somatic 5’ inversion in tumors.
Study	Tumor Type	# tumors	# inverted	# measured	% inverted	PMID	Notes
Tubio et. al. 2014	Bone	25	2	6	0.333333	25082706
Tubio et. al. 2014	Breast	87	17	58	0.293103	25082706
Helman et. al. 2014	Breast	36	17	38	0.447368	24823667	BRCA (breast carcinoma); No option for "not measured" 5' inversion
Tubio et. al. 2014	Colon	15	62	167	0.371257	25082706
Lee et. al. 2012	Colon	5	41	137	0.29927	22745252	Colorectal
Helman et. al. 2014	Colon	3	43	94	0.457447	24823667	COAD (colon adenocarcinoma); No option for "not measured" 5' inversion
Solyom et. al. 2012	Colon	16	10	35	0.285714	22968929	Colorectal
Scott et. al. 2016	Colon	1	19	27	0.703704	27197217	Colorectal
Helman et. al. 2014	Endometrial	17	40	83	0.481928	24823667	UCEC (uterine corpus endometrioid carcinoma); No option for "not measured" 5' inversion
Doucet-O'Hare et. al. 2015	Esophagus	20	11	35	0.314286	26283398	BE (Barrett's esophagus, premalignant) and EAC (esophageal adenocarcinoma)
Rodic et. al. 2015	GI	2	29	54	0.537037	26259033	Gastric adenocarcinoma and small bowel adenocarcinoma, initially misdiagnosed as PDAC
Helman et. al. 2014	Head & neck	28	99	203	0.487685	24823667	HNSC (head and neck squamous cell carcinoma); No option for "not measured" 5' inversion
Tubio et. al. 2014	Head & neck	6	41	105	0.390476	25082706	HNC
Shukla et. al. 2013	Liver	19	2	10	0.2	23540693	HCC (hepatocellular carcinoma)
Tubio et. al. 2014	Lung	37	818	2045	0.4	25082706
Helman et. al. 2014	Lung	52	184	357	0.515406	24823667	LUAD (lung adenocarcinoma) and LUSC (lung squamous cell carcinoma); No option for "not measured" 5' inversion
Lee et. al. 2012	Ovarian	8	3	18	0.166667	22745252
Rodic et. al. 2015	Pancreas	2	6	21	0.285714	26259033	PDAC (pancreatic ductal adenocarcinoma)
Tubio et. al. 2014	Pancreas	1	3	14	0.214286	25082706
Tubio et. al. 2014	Prostate	60	30	133	0.225564	25082706
Lee et. al. 2012	Prostate	7	3	26	0.115385	22745252
Helman et. al. 2014	Rectal	2	11	21	0.52381	24823667	READ (rectal adenocarcinoma); No option for "not measured" 5' inversion
Tissues below this line were excluded from figures
Helman 2014	OV	6	3	5	0.6	24823667	No option for "not measured" 5' inversion
Helman 2014	LUSC Exome	3	3	3	1	24823667
Helman 2014	UCEC Exome	2	1	2	0.5	24823667
Tubio 2014	Bladder	2	0	2	0	25082706
Miki 1992	CRC	1	1	1	1	1310068
Helman 2014	KIRC	18	0	1	0	24823667	No option for "not measured" 5' inversion
Helman 2014	HNSC Exome	1	1	1	1	24823667
Tubio 2014	Glioma	1	0	1	0	25082706
Tubio 2014	Melanoma	5	0	1	0	25082706
Tubio 2014	Renal	5	0	1	0	25082706
Tubio 2014	Mesothelioma	1	0	0	0	25082706

## Sheet: Legend
Supplemental Table S10. Analysis of 5’ inversions.
(A) 5' inversions detected in this study.
Column	Description
General Description	Total number of insertions in the entire 1KGP cohort, assessed chimpanzee genomes, and active transducing elements highlighted in main text figure 3A-E.
Source	Either the data set analyzed (All 1KGP - human 1KGP data; Chimp - all assessed chimpanzee genomes), a specific 'hot' FL-L1 element (i.e. 2:156527848), or all other FL-L1 elements determined to give rise to at least 1 offspring in this study (Non-hot transducers).
# offspring	Total number of sites assessed for 5' inversions in each dataset.
# inverted	Total number of sites that had 5' inversions in each dataset.
# measured	Total number of sites that could be accurately measured in each dataset.
% inverted	Percent of sites inverted given by: # inverted divided by #measured.
(B) 5' inversion rates for specific source elements.
Column	Description
General Description	Inversion rates for particular active FL-L1 elements identified in this study and in the literature.
Chr	Chromosome in Hg19 coordinates.
Pos	Position in Hg19 coordinates. Either #-# if a reference FL-L1, or a single coordinate for a non-reference site.
Study	Study from where this active FL-L1 element was identified.
# inverted	Total number of sites that had 5' inversions in each dataset.
# measured	Total number of sites that could be accurately measured in each dataset.
% inverted	Percent of sites inverted given by: # inverted divided by #measured.
PMID	Pubmed ID of the study given in 'Study'.
Notes	Additional information for a particular FL-L1 element.
(C) 5' inversion rates determined by other studies.
Column	Description
General Description	Inversion rates across studies designed to idenfity 5' inversions.
Study	Study from where this active FL-L1 element was identified.
# inverted	Total number of sites that had 5' inversions in each dataset.
# measured	Total number of sites that could be accurately measured in each dataset.
% inverted	Percent of sites inverted given by: # inverted divided by #measured.
Location	Tissue type analyzed in this study. Either germ-line or somatic.
PMID	Pubmed ID of the study given in 'Study'.
Notes	Additional information for a particular FL-L1 element.
(D) Somatic 5' inversion rates in different tumor types
Column	Description
General Description	5' Inversion rates across different tumor types.
Study	Study from where this active FL-L1 element was identified.
Tumor Type	Tumor type analyzed in any given 'Study'.
# tumors	Total number of tumors analyzed in the 'Study'.
# inverted	Total number of sites that had 5' inversions in each dataset.
# measured	Total number of sites that could be accurately measured in each dataset.
% inverted	Percent of sites inverted given by: # inverted divided by #measured.
PMID	Pubmed ID of the study given in 'Study'.
Notes	Additional information for a particular FL-L1 element.
