# Supplementary material for: The Mobile Element Locator Tool (MELT): population-scale mobile element discovery and biology
Source: Genome Res. 2017 Nov;27(11):1916–29. doi: 10.1101/gr.218032.116 (PMC5668948; doi:10.1101/gr.218032.116)
Supplement: Supplemental Material [file supp_gr.218032.116_Supplemental_Table_S11.xlsx]

## Sheet: A
Supplemental Table S11. Characterization of ancient hominid introgression.
(A) Three SVA MEIs found only in ancient genomes.
Chr	Position	Info	Denisovan GT	Neanderthal GT	Status	ACB	ASW	BEB	CDX	CEU	CHB	CHS	CLM	ESN	FIN	GBR	GIH	GWD	IBS	ITU	JPT	KHV	LWK	MSL	MXL	PEL	PJL	PUR	STU	TSI	YRI
13	32328982	TSD=null;ASSESS=2;INTERNAL=NM_130806,INTRONIC;SVTYPE=SVA;SVLEN=100;MEINFO=SVA,1215,1315,-;DIFF=n1-1214,t1267c,g1268a,i1283c,g1310t;LP=6;RP=1;RA=2.585;PRIOR=false	0/1:-30,-4.82,-58.9	0/0:-0,-2.41,-48	ANCIENT	0	0	0	0	0	0	0	0	0	0	0	0	0	0	0	0	0	0	0	0	0	0	0	0	0	0
14	90912037	TSD=null;ASSESS=2;INTERNAL=NR_033986,PROMOTER;SVTYPE=SVA;SVLEN=232;MEINFO=SVA,1083,1315,-;DIFF=n1-1082,c1119a,c1129a,g1168a,c1182a,g1191c,g1268a,c1274t,t1292c,c1302t;LP=16;RP=1;RA=4;PRIOR=false	0/1:-97.32,-12.64,-118	0/1:-50,-4.21,-24	ANCIENT	0	0	0	0	0	0	0	0	0	0	0	0	0	0	0	0	0	0	0	0	0	0	0	0	0	0
8	21879104	TSD=null;ASSESS=2;INTERNAL=NM_182795,PROMOTER;SVTYPE=SVA;SVLEN=66;MEINFO=SVA,1249,1315,+;DIFF=n1-1248,g1268a,t1292c;LP=1;RP=5;RA=-2.322;PRIOR=false	0/1:-30,-4.21,-41.5	0/0:-0,-1.81,-36	ANCIENT	0	0	0	0	0	0	0	0	0	0	0	0	0	0	0	0	0	0	0	0	0	0	0	0	0	0

## Sheet: B
Supplemental Table S11. Characterization of ancient hominid introgression.
(B) 13 SVA MEIs shared by ancient and modern human genomes.
Chr	Position	Info	Denisovan GT	Neanderthal GT	Status	ACB	ASW	BEB	CDX	CEU	CHB	CHS	CLM	ESN	FIN	GBR	GIH	GWD	IBS	ITU	JPT	KHV	LWK	MSL	MXL	PEL	PJL	PUR	STU	TSI	YRI
10	3083763	TSD=AAAAATGGT;ASSESS=5;INTERNAL=null,null;SVTYPE=SVA;SVLEN=1240;MEINFO=SVA,75,1315,null;DIFF=n1-914,g938a,c945a,t970c,t985c,g1009t,n1015-1081,c1129g,c1163a,c1164t,g1191a,n1214-1217,t1267c,g1268a,g1310t;LP=1;RP=1;RA=0;PRIOR=true	1/1:-20,-1.2,-0	0/0:-0,-1.2,-24	SHARED	0.333333	0.269231	0.26	0.25	0.419355	0.221649	0.310185	0.290698	0.345745	0.360825	0.47619	0.322115	0.441441	0.427184	0.324742	0.277778	0.14	0.354839	0.335443	0.322034	0.228916	0.311111	0.377778	0.25	0.455882	0.302198
11	33197326	TSD=ATATTGGTTCATTCTTGACTTTGT;ASSESS=2;INTERNAL=NR_034027,INTRONIC;SVTYPE=SVA;SVLEN=1267;MEINFO=SVA,48,1315,null;DIFF=n1-47,n73-74,a78c,a143g,t152c,g153c,c158t,a167g,g192c,t193c,c201t,t202g,c205t,d211,n212,a218g,g219a,t221a,g225a,a231g,c232t,t236c,n248-1316;LP=1;RP=1;RA=0;PRIOR=true	0/1:-20,-4.82,-72	0/0:-0,-2.41,-48	SHARED	0.00526316	0	0	0	0	0	0.00462963	0	0	0	0	0	0	0	0	0	0	0	0	0	0	0	0	0	0	0
11	77581672	TSD=null;ASSESS=0;INTERNAL=NM_024684,INTRONIC;SVTYPE=SVA;SVLEN=1167;MEINFO=SVA,148,1315,null;DIFF=n1-892,g938a,c945a,t970c,t985c,n993-1091,c1129g,c1146a,c1163a,c1164t,g1219c,t1267c,g1268a,g1310t,n1316;LP=1;RP=1;RA=0;PRIOR=true	0/1:-18.8,-2.41,-23	0/0:-0,-2.41,-44	SHARED	0	0	0	0	0	0	0	0.00555556	0	0	0	0	0	0	0	0	0	0	0	0	0	0	0	0	0	0
14	23194635	TSD=null;ASSESS=4;INTERNAL=null,null;SVTYPE=SVA;SVLEN=294;MEINFO=SVA,1021,1315,null;DIFF=n1-1020,t1029c,c1043t,a1053g,i1056a,c1056a,g1067a,t1074c,a1079t,c1081t,g1082t,c1177a,c1182t,c1190t,t1197a,a1213g,n1218-1316;LP=1;RP=1;RA=0;PRIOR=true	0/1:-1.4,-1.2,-4.4	0/0:-0,-1.81,-23.1	SHARED	0.015625	0	0	0	0	0	0	0	0	0	0	0	0	0	0	0.00555556	0	0.00520833	0	0	0	0	0	0	0	0
16	89148745	TSD=null;ASSESS=4;INTERNAL=null,null;SVTYPE=SVA;SVLEN=354;MEINFO=SVA,961,1315,null;DIFF=n1-960,g1009t,c1019t,a1041g,a1053g,g1067a,a1068g,a1079g,a1102g,a1116g,c1129g,a1132g,c1157t,g1268a,t1292c;LP=1;RP=1;RA=0;PRIOR=true	0/0:-0,-3.61,-71.4	1/1:-20,-1.2,-0	SHARED	0	0	0.027027	0	0	0	0	0	0	0	0	0	0	0.00490196	0.00515464	0	0	0	0	0	0	0.010989	0	0	0	0
17	17522497	TSD=null;ASSESS=3;INTERNAL=null,null;SVTYPE=SVA;SVLEN=407;MEINFO=SVA,908,1315,null;DIFF=n1-907,n910-911,n915,n918-920,n923,g938a,c945a,t970c,t985c,g1009t,a1053g,g1067a,a1079g,c1129g,c1146a,c1163a,c1164t,t1267c,g1268a,g1310t;LP=1;RP=1;RA=0;PRIOR=true	0/1:-17.76,-3.01,-23.5	0/0:-0,-1.81,-35.4	SHARED	0	0	0	0	0	0	0	0.0114943	0	0.0505051	0.0465116	0	0.00471698	0	0	0	0	0	0	0.00847458	0	0	0.0176471	0	0.0145631	0
19	44377945	TSD=GTGCAAATATTTTCT;ASSESS=5;INTERNAL=NM_001033719,EXON_2;SVTYPE=SVA;SVLEN=1267;MEINFO=SVA,48,1315,null;DIFF=n1-946,t970c,t985c,g1009t,a1053g,g1067a,a1079g,c1129g,c1146a,c1163a,c1164t,t1267c,g1268a,g1310t;LP=1;RP=1;RA=0;PRIOR=true	1/1:-20,-1.2,-0	0/0:-0,-1.2,-24	SHARED	0.0797872	0.169643	0	0	0	0	0	0.0176471	0.125	0	0	0	0.207207	0	0	0	0	0.107527	0.107143	0.0163934	0	0	0.0549451	0	0	0.163043
20	5268423	TSD=GACACTGGATTCTT;ASSESS=5;INTERNAL=null,null;SVTYPE=SVA;SVLEN=1311;MEINFO=SVA,5,1316,null;DIFF=n1-955,g1009t,c1019t,a1053g,g1067a,d1077-1078,n1081,a1087g,c1129g,c1149t,c1157t,g1268a,t1292g;LP=1;RP=1;RA=0;PRIOR=true	0/1:-8.99,-1.81,-5.22	0/0:-0,-1.2,-22	SHARED	0.290698	0.26	0.306667	0.530612	0.342391	0.483333	0.5	0.283951	0.304348	0.368421	0.386905	0.29798	0.28125	0.278846	0.308511	0.357955	0.458763	0.388235	0.240741	0.203704	0.272152	0.382353	0.278409	0.284211	0.402913	0.269663
6	33030313	TSD=CTCTTTTTCTT;ASSESS=5;INTERNAL=NM_033554,TERMINATOR;SVTYPE=SVA;SVLEN=1308;MEINFO=SVA,8,1316,null;DIFF=n1-987,g1009t,a1040t,a1053g,a1079g,c1129g,c1177a,t1180a,g1226c,g1268a,c1285g;LP=1;RP=1;RA=0;PRIOR=true	0/1:-40,-3.01,-12	0/0:-0,-1.81,-36	SHARED	0.322581	0.31	0.236842	0.706186	0.153846	0.510417	0.654206	0.209302	0.373626	0.0561224	0.2	0.235849	0.454545	0.1875	0.21134	0.449438	0.580808	0.345745	0.474359	0.139344	0.261905	0.264368	0.244186	0.213542	0.145631	0.60119
8	36144576	TSD=AAAAAAAAAAAAAAAAAAAA;ASSESS=5;INTERNAL=null,null;SVTYPE=SVA;SVLEN=1175;MEINFO=SVA,140,1315,null;DIFF=n1-970,c984t,t985c,g1009t,a1053g,g1063a,g1067a,a1079g,c1129g,c1146a,c1163a,c1164t,t1267c,g1268a,g1310t;LP=1;RP=1;RA=0;PRIOR=true	0/1:-29.98,-3.61,-12.2	0/0:-0,-1.2,-24	SHARED	0.0406977	0.0363636	0	0	0	0	0	0	0.0304878	0	0	0	0.0625	0.00520833	0	0	0	0.0406977	0.0714286	0	0	0.0174419	0.011236	0.0114943	0	0.047619
8	146253403	TSD=CCCTCAGTTTTTATTGATTATTATTTT;ASSESS=5;INTERNAL=null,null;SVTYPE=SVA;SVLEN=1296;MEINFO=SVA,20,1316,null;DIFF=n1-971,a1053g,g1067a,t1075c,a1079g,c1129g,a1260g,g1268a,t1292c;LP=1;RP=1;RA=0;PRIOR=true	0/1:-13.66,-3.01,-19.3	1/1:-16.7,-1.2,-0	SHARED	0.0322581	0.0660377	0.0320513	0.0969388	0.103261	0.105263	0.0972222	0.0903614	0.0806452	0.109375	0.10241	0.0428571	0.0663717	0.0961538	0.09	0.0879121	0.08	0.106383	0.060241	0.0932203	0.0792683	0.103261	0.115385	0.0555556	0.102941	0.0797872
12	125842892	TSD=AATGCTAATATCTT;ASSESS=5;INTERNAL=NM_052907,INTRONIC;SVTYPE=SVA;SVLEN=1307;MEINFO=SVA,9,1316,null;DIFF=n1-1023,a1053g,g1067a,a1079g,g1082c,g1083a,c1129g,c1163a,c1164t,t1267c,g1268a,c1274t,g1310t;LP=6;RP=1;RA=2.585;PRIOR=false	1/1:-25.6,-1.81,-0.01	1/1:-30,-1.81,-0	SHARED	0.0274725	0.0283019	0	0	0	0	0	0.00588235	0.0421053	0	0	0	0.018018	0	0	0	0	0.021978	0.0180723	0	0	0	0	0	0.00485437	0.0265957
20	3381150	TSD=AGAAATTCATCTATAAAT;ASSESS=5;INTERNAL=NM_001009984,INTRONIC;SVTYPE=SVA;SVLEN=1310;MEINFO=SVA,6,1316,null;DIFF=n1-983,g1009t,c1019t,a1053g,g1067a,a1079g,g1099a,c1129g,c1157t,i1185aaggcc,c1252g,g1268a,t1292c;LP=1;RP=6;RA=-2.585;PRIOR=false	0/1:-20,-2.41,-24	0/0:-0,-4.21,-84	SHARED	0.0246914	0.0106383	0.0149254	0.0102041	0.0170455	0.0116279	0.0277778	0	0.0641026	0.016129	0.0185185	0.0163043	0.09	0.0104167	0	0	0.00568182	0.0352941	0.030303	0	0.00684932	0.00574713	0.00561798	0.011236	0.0151515	0.0535714

## Sheet: C
Supplemental Table S11. Characterization of ancient hominid introgression.
(C) Tabulation of data presented in Figures 6C,D.
Population	Continental Superpopulation(s)	# Individuals in Pop	% Alu Shared with Denisovan	Den STDEV	% Alu Shared with Neanderthal	Nea STDEV
ESN	AFR	97	2.53876	0.390944	0.796674	0.255129
GWD	AFR	113	2.51626	0.353943	0.770748	0.237381
LWK	AFR	97	2.56765	0.51834	0.712727	0.231035
MSL	AFR	84	2.60934	0.483538	0.751635	0.200589
YRI	AFR	97	2.56002	0.404619	0.753246	0.255569
ACB	AFR/AMR	96	2.60657	0.461681	0.785529	0.210881
ASW	AFR/AMR	59	2.49516	0.593459	0.760149	0.418931
CLM	AMR	91	2.52946	0.447724	1.0809	0.399053
MXL	AMR	64	2.50994	0.609129	1.05323	0.423638
PEL	AMR	85	2.61326	0.390538	1.18428	0.268966
PUR	AMR	96	2.5827	0.514982	1.07972	0.325076
CDX	EAS	98	2.76609	0.32832	1.30816	0.234924
CHB	EAS	97	2.79845	0.348287	1.3178	0.302389
CHS	EAS	108	2.8016	0.408385	1.33189	0.281302
JPT	EAS	92	2.66559	0.309395	1.31538	0.270345
KHV	EAS	100	2.72057	0.34745	1.27029	0.259842
CEU	EUR	94	2.6054	0.34521	1.07544	0.224534
FIN	EUR	99	2.64947	0.390469	1.17447	0.298744
GBR	EUR	86	2.53169	0.433207	1.08952	0.265116
IBS	EUR	106	2.69014	0.405417	1.0943	0.283339
TSI	EUR	107	2.57875	0.540719	1.10018	0.474672
BEB	SAS	79	2.68764	0.542797	1.11887	0.34069
GIH	SAS	106	2.70214	0.367097	1.06183	0.234
ITU	SAS	103	2.83046	0.483207	1.07438	0.317135
PJL	SAS	96	2.76418	0.571492	1.104	0.358481
STU	SAS	103	2.6847	0.420995	1.08199	0.310543

## Sheet: D
Supplemental Table S11. Characterization of ancient hominid introgression.
(D) Raw data for Figure 6E.
Chromosome	Position	Bar Number	Archaic Shared	HAP+/MEI+	HAP+/MEI-	HAP-/MEI+	HAP-/MEI-	HAP+/MEI./.	HAP-/MEI./.	r2-RH	Total Individuals	MEI Type	Gene	Location in Gene	Gene Function
6	102846094	1	NEANDERTHAL	149	22	5	381	12	46	0.783579	615	LINE-1	null	null
6	104374917	2	NEANDERTHAL	58	12	0	542	0	3	0.81054	615	Alu	null	null
10	9683707	3	BOTH	57	8	0	456	7	87	0.861741	615	Alu	null	null
13	81612466	4	NEANDERTHAL	45	8	0	550	1	11	0.836859	615	Alu	LINC00377	INTRONIC	LincRNA
1	198469350	5	NEANDERTHAL	39	5	17	540	1	13	0.588136	615	Alu	null	null
15	54194258	6	NEANDERTHAL	38	10	8	547	1	11	0.628056	615	Alu	null	null
4	115382209	7	NEANDERTHAL	37	7	7	555	2	7	0.686412	615	Alu	null	null
4	126446092	8	NEANDERTHAL	35	6	0	564	1	9	0.844745	615	Alu	null	null
12	99742214	9	NEANDERTHAL	35	1	5	540	3	31	0.840889	615	Alu	ANKS1B	INTRONIC	Ankyrin repeat domain protein
2	76150209	10	NEANDERTHAL	25	9	8	538	0	35	0.534069	615	Alu	null	null
4	131421317	11	BOTH	24	4	0	576	0	11	0.851191	615	Alu	null	null
5	13231906	12	NEANDERTHAL	21	4	1	577	1	11	0.794416	615	LINE-1	null	null
3	166376842	13	NEANDERTHAL	20	11	1	570	0	13	0.600625	615	Alu	null	null
13	67725856	14	NEANDERTHAL	20	4	1	585	0	5	0.786414	615	Alu	PCDH9	INTRONIC	Protocadherin 9
12	10149155	15	NEANDERTHAL	19	0	3	589	0	4	0.859329	615	Alu	CLEC1B	INTRONIC	C-type lectin
2	169472066	16	NEANDERTHAL	19	1	50	535	1	9	0.236488	615	Alu	CERS6	INTRONIC	Ceramide synthase (Lipid biosynthesis)
3	67584369	17	NEANDERTHAL	16	0	12	577	0	10	0.559803	615	LINE-1	SUXLG2	INTRONIC	Succinate-CoA Ligase
12	58561372	18	NEANDERTHAL	13	1	5	591	0	5	0.663084	615	Alu	null	null
1	162263027	19	NEANDERTHAL	13	0	18	577	0	7	0.406661	615	Alu	NOS1AP	INTRONIC	Nitric oxide function
15	47095246	20	BOTH	9	0	0	577	0	29	1	615	LINE-1	null	null
4	132548314	21	NEANDERTHAL	7	1	0	598	0	9	0.873477	615	Alu	null	null
2	192116583	22	BOTH	5	0	0	605	0	5	1	615	Alu	MYO1B	INTRONIC	Myosin (Muscle function)
14	104226446	23	NEANDERTHAL	5	1	3	584	0	22	0.516242	615	Alu	PPP1R13B	INTRONIC	Protein Phosphotase 1, Subunit 13B
3	144402023	24	NEANDERTHAL	4	0	2	569	0	40	0.664388	615	LINE-1	null	null
8	14771331	25	BOTH	4	0	9	570	0	32	0.30294	615	Alu	SGCZ	INTRONIC	Zeta sarcoglycan
8	4759056	26	NEANDERTHAL	4	0	11	579	0	21	0.261735	615	Alu	CSMD1	INTRONIC	Unknown
2	192075970	27	NEANDERTHAL	4	0	24	560	0	27	0.136974	615	Alu	null	null
18	41933843	28	NEANDERTHAL	3	0	5	598	0	9	0.371856	615	Alu	LINC01478	INTRONIC	LincRNA
2	189209762	29	NEANDERTHAL	3	0	10	574	0	28	0.226862	615	Alu	GULP1	INTRONIC	Unknown
1	56535817	30	NEANDERTHAL	3	56	15	533	1	7	0.001681	615	LINE-1	null	null
19	32280083	31	NEANDERTHAL	2	0	0	588	0	25	1	615	Alu	null	null
9	115664024	32	NEANDERTHAL	2	0	5	605	0	3	0.283343	615	Alu	null	null
2	116617240	33	NEANDERTHAL	1	0	0	587	0	27	1	615	Alu	null	null
5	45198514	34	NEANDERTHAL	1	0	4	598	0	12	0.198648	615	Alu	null	null
7	9611283	35	NEANDERTHAL	1	0	32	570	0	12	0.0286964	615	Alu	null	null
11	56336833	36	NEANDERTHAL	1	1	48	556	1	8	0.00783225	615	Alu	OR5M10	TERMINATOR	Olfactory Receptor
X	38097245	37	NEANDERTHAL	0	8	1	600	0	6	n.d.	615	LINE-1	null	null
10	59018655	38	BOTH	0	0	2	604	0	9	n.d.	615	Alu	null	null
2	236838870	39	NEANDERTHAL	0	0	3	605	0	7	n.d.	615	Alu	AGAP1	INTRONIC	Akyrin repeat containing
4	104367895	40	NEANDERTHAL	0	0	3	600	0	12	n.d.	615	Alu	LOC101929448	TERMINATOR	Unknown
12	88277462	41	NEANDERTHAL	0	1	3	581	0	30	n.d.	615	Alu	null	null
X	80842462	42	NEANDERTHAL	0	0	3	575	0	37	n.d.	615	Alu	null	null
2	192343986	43	NEANDERTHAL	0	1	4	597	0	13	n.d.	615	Alu	null	null
6	2290014	44	NEANDERTHAL	0	0	7	579	0	29	n.d.	615	Alu	LOC100508120	INTRONIC	Unknown
6	56387576	45	NEANDERTHAL	0	0	15	594	0	6	n.d.	615	Alu	DST	INTRONIC	Dystonin (Cell Adhesion)
3	188313041	46	NEANDERTHAL	0	0	16	568	0	31	n.d.	615	Alu	LPP	INTRONIC	Cell Adhesion
X	143420722	47	NEANDERTHAL	0	22	24	552	0	17	n.d.	615	Alu	null	null
11	26191093	48	NEANDERTHAL	0	0	53	542	0	20	n.d.	615	Alu	null	null
15	32954696	49	NEANDERTHAL	0	0	86	519	0	10	n.d.	615	Alu	SCG5	INTRONIC	Secretogranin V

## Sheet: E
Supplemental Table S11. Characterization of ancient hominid introgression.
(E) Raw data for Figure 6F.
Chromosome	Position	Bar Number	Archaic Shared	HAP+/MEI+	HAP+/MEI-	HAP-/MEI+	HAP-/MEI-	HAP+/MEI./.	HAP-/MEI./.	r2-RH	Total Individuals	MEI Type
20	12543592	1	BOTH	6	0	0	577	2	30	1	615	Alu
6	80080473	2	NEANDERTHAL	0	0	1	605	0	9	n.d.	615	Alu
9	80365050	3	NEANDERTHAL	1	0	1	568	0	45	0.499142	615	Alu
11	100911793	4	NEANDERTHAL	103	14	1	474	7	16	0.844561	615	Alu
6	96391917	5	NEANDERTHAL	3	1	4	575	0	32	0.317194	615	Alu
14	43740637	6	NEANDERTHAL	129	12	6	457	3	8	0.83869	615	Alu
13	64569858	7	NEANDERTHAL	28	1	8	552	0	26	0.738053	615	LINE-1
15	60992790	8	NEANDERTHAL	0	0	9	599	0	7	n.d.	615	Alu
1	82850409	9	NEANDERTHAL	2	1	9	584	1	18	0.117306	615	Alu
13	66628763	10	NEANDERTHAL	49	19	10	514	1	22	0.557561	615	Alu
15	74452594	11	NEANDERTHAL	0	0	11	592	0	12	n.d.	615	Alu
1	187522081	12	BOTH	0	0	12	559	0	44	n.d.	615	Alu
3	120309385	13	NEANDERTHAL	0	0	16	564	0	35	n.d.	615	Alu
8	69587130	14	NEANDERTHAL	0	0	16	589	0	10	n.d.	615	Alu
12	47730698	15	NEANDERTHAL	10	18	26	544	0	17	0.0765629	615	Alu
7	142673652	16	BOTH	0	0	27	572	0	16	n.d.	615	Alu
15	87700642	17	NEANDERTHAL	0	0	27	576	0	12	n.d.	615	Alu
10	68217408	18	NEANDERTHAL	44	9	30	521	1	10	0.448096	615	Alu
7	42580004	19	BOTH	5	1	33	536	2	38	0.100552	615	Alu
3	113203549	20	NEANDERTHAL	16	4	41	553	0	1	0.199898	615	Alu
8	73761381	21	NEANDERTHAL	0	0	41	531	0	43	n.d.	615	Alu
3	149142389	22	BOTH	4	2	52	530	1	26	0.0390853	615	Alu
2	48276534	23	NEANDERTHAL	21	2	53	534	1	4	0.2304	615	Alu
1	77634327	24	BOTH	0	0	60	541	0	14	n.d.	615	Alu
4	117350583	25	NEANDERTHAL	0	0	73	520	0	22	n.d.	615	Alu
6	139294734	26	NEANDERTHAL	0	0	91	510	0	14	n.d.	615	Alu
X	5781754	27	NEANDERTHAL	0	0	96	497	0	22	n.d.	615	Alu
1	13178057	28	NEANDERTHAL	0	0	98	508	0	9	n.d.	615	LINE-1
1	163088865	29	BOTH	50	8	129	412	1	15	0.162328	615	Alu
4	134922359	30	BOTH	0	0	130	480	0	5	n.d.	615	Alu
1	56405404	31	BOTH	62	3	136	398	1	15	0.213721	615	LINE-1
X	152001805	32	BOTH	0	0	149	433	0	33	n.d.	615	Alu
6	66163982	33	NEANDERTHAL	79	7	153	361	6	9	0.19963	615	Alu
1	232587774	34	NEANDERTHAL	161	10	163	274	1	6	0.262451	615	Alu
7	117356251	35	BOTH	0	0	166	434	0	15	n.d.	615	Alu
14	106480860	36	NEANDERTHAL	0	0	192	290	0	133	n.d.	615	Alu
4	77023821	37	NEANDERTHAL	0	0	242	333	0	40	n.d.	615	Alu
11	81283884	38	BOTH	0	0	250	351	0	14	n.d.	615	Alu
13	61734497	39	NEANDERTHAL	71	2	284	243	6	9	0.0831746	615	LINE-1
5	159122155	40	NEANDERTHAL	0	0	285	314	0	16	n.d.	615	Alu
13	90401846	41	NEANDERTHAL	12	0	289	272	1	41	0.019321	615	Alu
15	35473633	42	NEANDERTHAL	2	0	344	255	0	14	0.00246016	615	Alu
3	176143034	43	BOTH	0	0	356	224	0	35	n.d.	615	Alu
1	78607067	44	NEANDERTHAL	0	0	360	232	0	23	n.d.	615	Alu
19	31690684	45	NEANDERTHAL	0	0	393	201	0	21	n.d.	615	Alu
1	181047425	46	NEANDERTHAL	5	0	397	204	0	9	0.004225	615	Alu
6	32687172	47	NEANDERTHAL	0	0	401	158	0	56	n.d.	615	Alu
10	124736004	48	BOTH	46	2	411	148	1	7	0.0194882	615	Alu
12	32076427	49	BOTH	41	1	459	106	1	7	0.0119028	615	Alu
12	10234202	50	NEANDERTHAL	0	0	464	136	0	15	n.d.	615	Alu
1	66055941	51	BOTH	0	0	471	125	0	19	n.d.	615	Alu
3	98726776	52	BOTH	2	1	506	90	0	16	n.d.	615	Alu
9	7852538	53	BOTH	5	0	510	88	0	12	0.00142884	615	Alu
6	13503049	54	BOTH	0	0	526	67	0	22	n.d.	615	LINE-1
1	100994221	55	BOTH	0	0	550	36	0	29	n.d.	615	Alu
3	31881398	56	BOTH	5	0	556	46	0	8	0.00068121	615	Alu
14	20484312	57	NEANDERTHAL	0	0	557	33	0	25	n.d.	615	Alu
4	186361924	58	BOTH	0	0	560	27	0	28	n.d.	615	Alu
15	23743561	59	NEANDERTHAL	0	0	582	33	0	0	n.d.	615	LINE-1
2	147020933	60	BOTH	6	0	584	6	0	19	0.00010404	615	LINE-1

## Sheet: Legend
Supplemental Table S11. Characterization of ancient hominid introgression.
(A) 3 SVA MEIs found only in ancient genomes.
Columan	Description
Chr	Chromosome
Position	Coordinate for MEI insertion site
Info	Info field from VCF file
Denisovan GT	MEI genotype in Denisovan
Neanderthal GT	MEI genotype in Neanderthal
Status	Whether shared with modern humans or not
ACB, etc.	MEI allele frequencies in 26 modern human populations (from 1000 Genomes, phase III)
(B) 13 SVA MEIs shared by ancient and modern human genomes.
Columan	Description
Chr	Chromosome
Position	Coordinate for MEI insertion site
Info	Info field from VCF file
Denisovan GT	MEI genotype in Denisovan
Neanderthal GT	MEI genotype in Neanderthal
Status	Whether shared with modern humans or not
ACB, etc.	MEI allele frequencies in 26 modern human populations (from 1000 Genomes, phase III)
(C) Tabulation of data presented in Figure 6C,D.
Columan	Description
Population	1000 Genomes Project Phase III population (26 total)
Continential Superpopulation(s)	Contiental Superpopulation(s) to which the population belongs
# Individuals in Pop	# Individuals examined in the study from the listed population
% Alu Shared with Denisovan	% Alu shared between modern humans and Denisovan
Den STDEV	Standard deviation of sharing between modern humans and Denisovan
% Alu Shared with Neanderthal	% Alu shared between modern humans and Neanderthal
Nea STDEV	Standard deviation of sharing between modern humans and Neanderthal
(D) Raw data for Figure 6E.
Each row represents one bar plotted in order (Bar Number), with Hg19 chromosome and position. For
each site, there were a total of six possibilities for haplotype/MEI sharing: HAP+/MEI+ (Haplotype and
MEI sites shared in individual), HAP+/MEI- (Haplotype present but no MEI), HAP-/MEI+ (Haplotype not
present but MEI at site), HAP+/MEI./. (Haplotype present but insufficient sequence coverage to
genotype MEI), HAP-/MEI- (Neither haplotype nor MEI present in individual), HAP-/MEI./. (haplotype
not present and insufficient sequence coverage to genotype MEI). If an insertion occurred within a
gene, then the gene name (gene), location of the MEI within the gene (gene location), and the putative
gene function (gene function) are listed.
Column	Description
Chromsome	Human Chromosome for haplotype (Hg19)
Position	Chromosomal coordinate
Bar number	Bar number (left to right) in Figure 6E
Archaic shared	Whether shared with Neanderthal or Denisovan (or both)
HAP+/MEI+	Number of HAP+/MEI+ haplotypes counted
HAP+/MEI-	Number of HAP+/MEI- haplotypes counted
HAP-/MEI+	Number of HAP-/MEI+ haplotypes counted
HAP-/MEI-	Number of HAP-/MEI- haplotypes counted
HAP+/MEI./.	Number of HAP+/MEI./. haplotypes counted (./. = no genotype measured)
HAP-/MEI./.	Number of HAP-/MEI./. haplotypes counted (./. = no genotype measured)
r2-RH	r2 value calculated using the Rogers and Huff method (PMID: 19433632)
Total Individuals	Total number of individuals examined
MEI Type	Whether Alu or LINE-1 (L1) MEI detected
Gene	Whether MEI found within an annotated gene
Location in Gene	Location within gene
Gene Function	Gene function (if known)
(E) Identical table to (D), but for the analysis shown in Figure 6F.
Column	Description
Chromsome	Human Chromosome for haplotype (Hg19)
Position	Chromosomal coordinate
Bar number	Bar number (left to right) in Figure 6E
Archaic shared	Whether shared with Neanderthal or Denisovan (or both)
HAP+/MEI+	Number of HAP+/MEI+ haplotypes counted
HAP+/MEI-	Number of HAP+/MEI- haplotypes counted
HAP-/MEI+	Number of HAP-/MEI+ haplotypes counted
HAP-/MEI-	Number of HAP-/MEI- haplotypes counted
HAP+/MEI./.	Number of HAP+/MEI./. haplotypes counted (./. = no genotype measured)
HAP-/MEI./.	Number of HAP-/MEI./. haplotypes counted (./. = no genotype measured)
r2-RH	r2 value calculated using the Rogers and Huff method (PMID: 19433632)
Total Individuals	Total number of individuals examined
MEI Type	Whether Alu or LINE-1 (L1) MEI detected
Gene	Whether MEI found within an annotated gene
Location in Gene	Location within gene
Gene Function	Gene function (if known)
