# Supplementary material for: The Mobile Element Locator Tool (MELT): population-scale mobile element discovery and biology
Source: Genome Res. 2017 Nov;27(11):1916–29. doi: 10.1101/gr.218032.116 (PMC5668948; doi:10.1101/gr.218032.116)
Supplement: Supplemental Material [file supp_gr.218032.116_Supplemental_Table_S12.xlsx]

## Sheet: Sheet1
Supplemental Table S12. Libraries included in MELT.
Citations and/or download sites are listed for the external libraries that are used with MELT ver. 2.0.
Library	Citation	Website
jAligner	(Moustafa 2014)	http://jaligner.sourceforge.net
Htsjdk	(Li et al. 2009)	http://samtools.github.io/htsjdk
jDRMAA	#N/A	http://www.drmaa.org
Biojava	(Prilic et al. 2012)	http://biojava.org
Jtr	#N/A	http://jtr.sourceforge.net
Apache CLI	#N/A	http://commons.apache.org/proper/commons-cli/
Apache Exec	#N/A	http://commons.apache.org/proper/commons-exec/
Apache IO	#N/A	http://commons.apache.org/proper/commons-io/
Apache Math	#N/A	http://commons.apache.org/proper/commons-math/
