# Supplementary material for: The Mobile Element Locator Tool (MELT): population-scale mobile element discovery and biology
Source: Genome Res. 2017 Nov;27(11):1916–29. doi: 10.1101/gr.218032.116 (PMC5668948; doi:10.1101/gr.218032.116)
Supplement: Supplemental Material [file supp_gr.218032.116_Supplemental_Table_S13.xlsx]

## Sheet: A
Supplemental Table S13. Reference mobile element sequences used for MEI discovery
Element	Source	Modifications?	Sequence
Alu	Stewart et al. 2011 (PMID: 21876680)		GGCCGGGCGCGGTGGCTCACGCCTGTAATCCCAGCACTTTGGGAGGCCGAGGCGGGCGGATCACGAGGTCAGGAGATCGAGACCATCCTGGCTAACACGGTGAAACCCCGTCTCTACTAAAAATACAAAAAATTAGCCGGGCGTGGTGGCGGGCGCCTGTAGTCCCAGCTACTCGGGAGGCTGAGGCAGGAGAATGGCGTGAACCCGGGAGGCGGAGCTTGCAGTGAGCCGAGATCGCGCCACTGCACTCCAGCCTGGGCGACAGAGCGAGACTCCGTCTC
L1	Dombrowski et al. 1993 (PMID: 8393568)		GGGGGAGGAGCCAAGATGGCCGAATAGGAACAGCTCCGGTCTACAGCTCCCAGCGTGAGCGACGCAGAAGACGGTGATTTCTGCATTTCCATCTGAGGTACCGGGTTCATCTCACTAGGGAGTGCCAGACAGTGGGCGCAGGCCAGTGTGTGTGCGCACCGTGCGCGAGCCGAAGCAGGGCGAGGCATTGCCTCACCTGGGAAGCGCAAGGGGTCAGGGAGTTCCCTTTCTGAGTCAAAGAAAGGGGTGACGGTCGCACCTGGAAAATCGGGTCACTCCCACCCGAATATTGCGCTTTTCAGACCGGCTTAAGAAACGGCGCACCACGAGACTATATCCCACACCTGGCTCGGAGGGTCCTACGCCCACGGAATCTCGCTGATTGCTAGCACAGCAGTC…
SVA	Stewart et al. 2011 (PMID: 21876680)	Removed Alu sequence on 5' end	CTCCCTCTCCCTCACCCTCTCCCCATGGTCTCCCTCTCCCTCTCTTTCCACGGTCTCCCTCTGATGCCGAGCCGAAGCTGGACGGTACTGCTGCCATCTCGGCTCACTGCAACCTCCCTGCCTGATTCTCCTGCCTCAGCTTGCCGAGTGCCTGCGATTGCAGGCGCGCGCCGCCACGCCTGACTGGTTTTCGTATTTTGTTAGTGGAGACGGGGTTTCGCTGTGTTGGCCGGGCTGGTCTCCAGCTCCTAACCGCGAGTGATCCACCAGCCTCGGCCTCCCGAGGTGCTGGGATTGCAGACGGAGTCTCGTTCACTCAGTGCTCAATGATGCCCAGGCTGGAGTGCAGTGGCGTGATCTCGGCTCGCTACAACCTCCACCTCCCAGCAGCCTGCCTTG…

## Sheet: Legend
Supplemental Table S13. Reference mobile element sequences used for MEI discovery
Citations and reference sequences are listed for the Alu, L1, and SVA MEs used in this study. In order to
increase specificity of SVA detection, the Alu homologous sequence on the 5’ end of SVA was removed
prior to performing MEI discovery.
Column	Description
Element	Alu, L1, or SVA
Source	Publication citation for DNA sequence
Modifications?	Whether the reference MEI sequence was modified and, if so, how it was modified.
DNA sequence	DNA sequence for reference element
